# Supplementary material for: Four-component acyloxy-trifluoromethylation of arylalkenes mediated by a photoredox catalyst
Source: Royal Society of Chemistry journal article supplement (doi:10.1039/c8ob02239a), 2018-10-09
Supplement: c8ob02239a1.pdf [file c8ob02239a1.pdf]

Supporting Information for

**Four-Component Acyloxytrifluoromethylation of Arylalkenes Mediated by  
Photoredox Catalyst**

Xiaocong Zhou,<sup>a,b</sup> Guijie Li,<sup>\*,a</sup> Zongzhou Shao,<sup>a</sup> Kun Fang,<sup>a</sup> Hongjun Gao,<sup>b</sup> Yuanqiang Li<sup>b</sup> and Yuanbin She<sup>\*,b</sup>

<sup>a</sup> College of Chemical Engineering, Zhejiang University of Technology, Hangzhou, Zhejiang 310014,  
P.R. China

<sup>b</sup> Zhejiang Jiuzhou Pharmaceutical Technology Co., Ltd. Hangzhou, Zhejiang 310051, P.R. China

*E-mail: guijieli@zjut.edu.cn; sheyb@zjut.edu.cn*

**Table of Contents**

|   |                                                                        |         |
|---|------------------------------------------------------------------------|---------|
| 1 | <b>General Information</b>                                             | S2      |
| 2 | <b>Table S1.</b> Screening of Additives and Photocatalysts             | S3      |
| 3 | <b>Reaction of Arylalkenes and Umemoto Reagent</b>                     | S4-S12  |
| 4 | <b>Control Experiments</b>                                             | S13     |
| 5 | <b>D-Labeling Experiment</b>                                           | S13-S14 |
| 6 | <b>O<sup>18</sup>-Labeling Experiment</b>                              | S14-S15 |
| 7 | <b>Light-dark interval experiment</b>                                  | S16     |
| 8 | <b>Quantum Yield Measurement</b>                                       | S16-S20 |
| 9 | <sup>1</sup> H, <sup>13</sup> C, <sup>19</sup> F NMR, and HRMS spectra | S21-S64 |

**General Information.**  $^1\text{H}$ ,  $^{13}\text{C}$ , and  $^{19}\text{F}$  NMR spectra were measured on a 400, 100, and 376 MHz spectrometers in  $\text{CDCl}_3$  or  $\text{DMSO-}d_6$ , respectively. If  $\text{CDCl}_3$  used as solvent,  $^1\text{H}$  NMR spectra were recorded with residual  $\text{CDCl}_3$  ( $\delta = 7.26$  ppm) as internal reference; if  $\text{DMSO-}d_6$  used as solvent,  $^1\text{H}$  NMR spectra were recorded with residual  $\text{H}_2\text{O}$  ( $\delta = 3.33$  ppm) as internal reference;  $^{13}\text{C}$  NMR spectra were recorded with  $\text{CDCl}_3$  ( $\delta = 77.00$  ppm) as internal reference;  $^{19}\text{F}$  chemical shifts were given as  $\delta$  in ppm downfield from  $\text{CFCl}_3$ . The following abbreviations (or combinations thereof) were used to explain the  $^1\text{H}$ ,  $^{13}\text{C}$ , and  $^{19}\text{F}$  NMR multiplicities: s = singlet, d = doublet, t = triplet, q = quartet, p = quintet, m = multiplet, br = broad. All of the new compounds were analyzed for HRMS on an EI-TOF mass spectrometer using electrospray ionization in positive ion mode. The detection of compound **5** was analyzed for HRMS on an accurate mass Q TOF LC/MS. Unless otherwise noted, all reagents and substrates were obtained commercially and used without further purification.

**Table S1.** Screening of Additives and Photocatalysts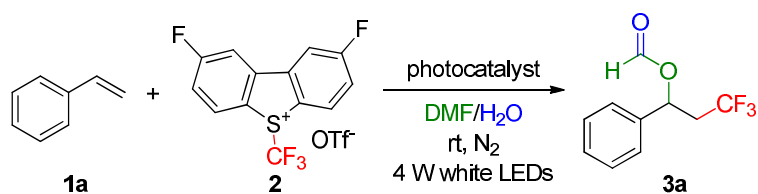

| Entry | Photocatalyst                                        | Additive (2.0 equiv)            | Yield <sup>a</sup> |
|-------|------------------------------------------------------|---------------------------------|--------------------|
| 1     | Ru(bpy) <sub>3</sub> (PF <sub>6</sub> ) <sub>2</sub> | K <sub>2</sub> HPO <sub>4</sub> | 10                 |
| 2     | Ru(bpy) <sub>3</sub> (PF <sub>6</sub> ) <sub>2</sub> | NaHCO <sub>3</sub>              | 14                 |
| 3     | Ru(bpy) <sub>3</sub> (PF <sub>6</sub> ) <sub>2</sub> | K <sub>2</sub> CO <sub>3</sub>  | N.D                |
| 4     | <i>fac</i> -Ir(ppy) <sub>3</sub>                     | ---                             | 21                 |
| 5     | [Ir(ppy) <sub>2</sub> (bpy)]PF <sub>6</sub>          | ---                             | 8                  |
| 6     | [Ir(ppy) <sub>2</sub> (dtbbpy)]PF <sub>6</sub>       | ---                             | 18                 |
| 7     | Ir[dFppy] <sub>2</sub> (dtbbpy)PF <sub>6</sub>       | ---                             | 11                 |

<sup>a</sup>The yields were determined by <sup>19</sup>F NMR spectroscopies of crude reaction mixtures with 1-chloro-4-(trifluoromethyl)benzene as an internal standard.

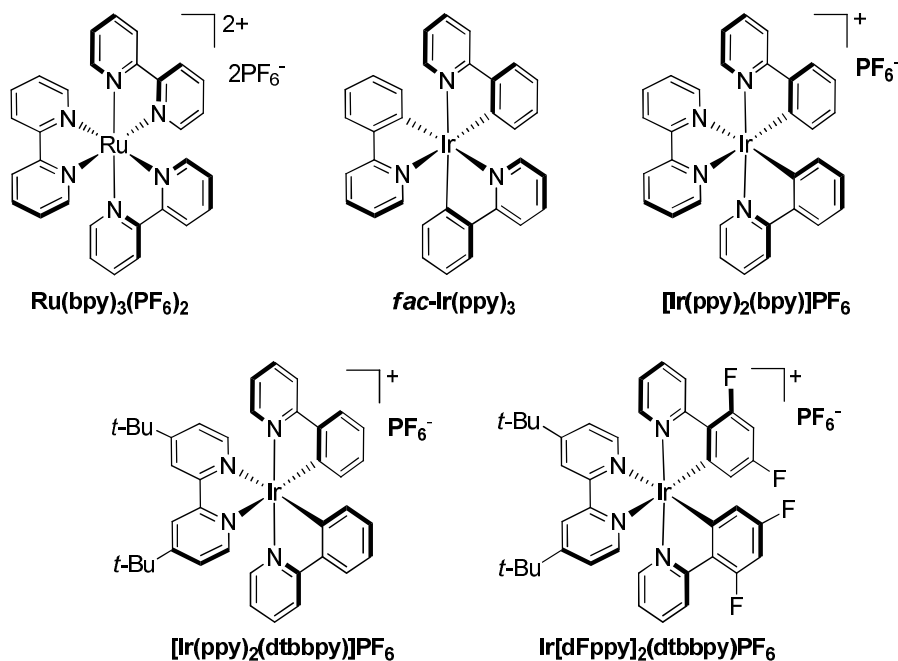

### General Procedure for the Reaction of Arylalkenes and Umemoto Reagent

A 10 mL Schlenk tube equipped with a magnetic stir bar was charged with arylalkene **1** (1.2 equiv), Umemoto reagent **2** (1.0 equiv), DMF or DMA (5.0 mL/mmol **2**), H<sub>2</sub>O (1.0 equiv) and Ru(bpy)<sub>3</sub>(PF<sub>6</sub>)<sub>2</sub> (0.5 mol %). The mixture was evacuated and back-filled with nitrogen three times. The tube was irradiated for 6 h by a 4 W white LED lamp placed at a distance of 1-2 cm. After that, 20 mL of water was added to the reaction mixture, which was then extracted with ethyl acetate (50 mL×3). The combined organic phases were washed with water, dried over MgSO<sub>4</sub> and concentrated in vacuum. The residue was purified by silica gel column chromatography to give the corresponding product **3** or **4**.

#### *3,3,3-Trifluoro-1-phenylpropyl formate (3a)*

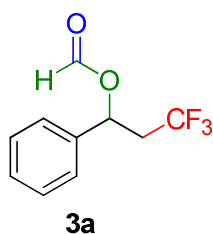

Following the general procedure, styrene **1a** (125 mg, 1.2 mmol, 1.2 equiv), **2** (438 mg, 1.0 mmol, 1.0 equiv), DMF (5.0 mL), H<sub>2</sub>O (18  $\mu$ L, 1.0 mmol, 1.0 equiv) and Ru(bpy)<sub>3</sub>(PF<sub>6</sub>)<sub>2</sub> (4.3 mg, 0.005 mmol, 0.5 mol %) irradiated by 4 W white LEDs for 6.0 h. After purification by silica gel column chromatography using 0-5 % ethyl acetate in hexanes as the eluent, the title compound was obtained as a colorless oil (161.2 mg, 74%). <sup>1</sup>H NMR (400 MHz, CDCl<sub>3</sub>):  $\delta$  = 2.51-2.63 (m, 1H), 2.80-2.93 (m, 1H), 6.22 (dd,  $J$  = 9.6, 3.6 Hz, 1H), 7.33-7.41 (m, 5H), 8.07 (s, 1H); <sup>13</sup>C NMR (100 MHz, CDCl<sub>3</sub>):  $\delta$  = 40.24 (q,  $J$  = 27.7 Hz), 69.07 (q,  $J$  = 3.3 Hz), 125.00 (q,  $J$  = 275.7 Hz), 126.35, 128.88, 128.97, 137.90, 159.36; <sup>19</sup>F NMR (376 MHz, CDCl<sub>3</sub>):  $\delta$  = -64.14 (s, 3F); HRMS (EI):  $m/z$  calcd for C<sub>10</sub>H<sub>9</sub>F<sub>3</sub>O<sub>2</sub> [M]<sup>+</sup> 218.0555, found 218.0558.

#### *3,3,3-Trifluoro-1-(p-tolyl)propyl formate (3b)*

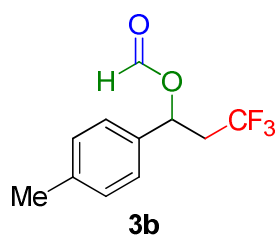

Following the general procedure, 1-methyl-4-vinylbenzene **1b** (142 mg, 1.2 mmol, 1.2 equiv), **2** (438 mg, 1.0 mmol, 1.0 equiv), DMF (5.0 mL), H<sub>2</sub>O (18  $\mu$ L, 1.0 mmol, 1.0 equiv) and Ru(bpy)<sub>3</sub>(PF<sub>6</sub>)<sub>2</sub> (4.3

mg, 0.005 mmol, 0.5 mol %) irradiated by 4 W white LEDs for 6.0 h. After purification by silica gel column chromatography using 0-5 % ethyl acetate in hexanes as the eluent, the title compound was obtained as a colorless oil (194.1 mg, 84%).  $^1\text{H}$  NMR (400 MHz,  $\text{DMSO-}d_6$ ):  $\delta$  = 2.30 (s, 3H), 2.83-2.97 (m, 1H), 3.05-3.19 (m, 1 H), 6.09 (dd,  $J$  = 3.6, 9.2 Hz, 1H), 7.21 (d,  $J$  = 8.0 Hz, 2H), 7.34 (d,  $J$  = 8.0 Hz, 2H), 8.30 (s, 1H);  $^{13}\text{C}$  NMR (100 MHz,  $\text{CDCl}_3$ ):  $\delta$  = 20.89, 40.00 (q,  $J$  = 28.0 Hz), 68.89 (q,  $J$  = 3.0 Hz), 125.08 (q,  $J$  = 276.0 Hz), 126.29, 129.43, 134.95, 138.82, 159.36;  $^{19}\text{F}$  NMR (376 MHz,  $\text{CDCl}_3$ ):  $\delta$  = -64.13 (s, 3F); HRMS (EI):  $m/z$  calcd for  $\text{C}_{11}\text{H}_{11}\text{F}_3\text{O}_2$   $[\text{M}]^+$  232.0711, found 232.0714.

*1-(4-Tert-butylphenyl)-3,3,3-trifluoropropyl formate (3c)*

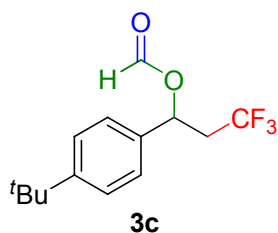

Following the general procedure, 1-*tert*-butyl-4-vinylbenzene **1c** (384 mg, 2.4 mmol, 1.2 equiv), **2** (876 mg, 2.0 mmol, 1.0 equiv), DMF (10.0 mL),  $\text{H}_2\text{O}$  (36  $\mu\text{L}$ , 2.0 mmol, 1.0 equiv) and  $\text{Ru}(\text{bpy})_3(\text{PF}_6)_2$  (8.6 mg, 0.01 mmol, 0.5 mol %) irradiated by 4 W white LEDs for 6.0 h. After purification by silica gel column chromatography using 0-5 % ethyl acetate in hexanes as the eluent, the title compound was obtained as a colorless oil (473.6 mg, 86%).  $^1\text{H}$  NMR (400 MHz,  $\text{CDCl}_3$ ):  $\delta$  = 1.31 (s, 9H), 2.49-2.61 (m, 1H), 2.80-2.93 (m, 1H), 6.21 (dd,  $J$  = 9.4, 3.4 Hz, 1H), 7.30 (d,  $J$  = 8.4 Hz, 2H), 7.40 (d,  $J$  = 8.4 Hz, 2H), 8.06 (s, 1H);  $^{13}\text{C}$  NMR (100 MHz,  $\text{CDCl}_3$ ):  $\delta$  = 31.18, 34.60, 40.16 (q,  $J$  = 28.3 Hz), 68.85 (q,  $J$  = 3.3 Hz), 125.11 (q,  $J$  = 276.0 Hz), 125.80, 126.14, 134.87, 152.09, 159.44;  $^{19}\text{F}$  NMR (376 MHz,  $\text{CDCl}_3$ ):  $\delta$  = -64.21 (s, 3F); HRMS (EI):  $m/z$  calcd for  $\text{C}_{14}\text{H}_{17}\text{F}_3\text{O}_2$   $[\text{M}]^+$  274.1181, found 274.1184.

*1-(Biphenyl-4-yl)-3,3,3-trifluoropropyl formate (3d)*

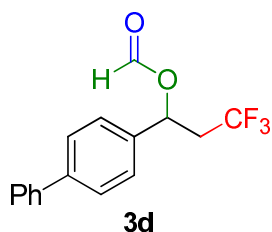

Following the general procedure, 4-vinylbiphenyl **1d** (432 mg, 2.4 mmol, 1.2 equiv), **2** (876 mg, 2.0 mmol, 1.0 equiv), DMF (10.0 mL),  $\text{H}_2\text{O}$  (36  $\mu\text{L}$ , 2.0 mmol, 1.0 equiv) and  $\text{Ru}(\text{bpy})_3(\text{PF}_6)_2$  (8.6 mg, 0.01 mmol, 0.5 mol %) irradiated by 4 W white LEDs for 6.0 h. After purification by silica gel column chromatography using 0-5 % ethyl acetate in hexanes as the eluent, the title compound was

obtained as a white solid (534.1 mg, 91%).  $^1\text{H}$  NMR (400 MHz,  $\text{CDCl}_3$ ):  $\delta$  = 2.55-2.67 (m, 1H), 2.84-2.98 (m, 1H), 6.27 (dd,  $J$  = 9.4, 3.8 Hz 1H), 7.37 (t,  $J$  = 7.2 Hz 1H), 7.43-7.47 (m, 4H), 7.57-7.62 (m, 4H), 8.10 (s, 1H);  $^{13}\text{C}$  NMR (100 MHz,  $\text{CDCl}_3$ ):  $\delta$  = 40.18 (q,  $J$  = 28.3 Hz), 68.88 (q,  $J$  = 3.3 Hz), 125.02 (q,  $J$  = 276.0 Hz), 126.84, 127.09, 127.61, 127.64, , 128.82, 136.74, 140.20, 141.96, 159.44;  $^{19}\text{F}$  NMR (376 MHz,  $\text{CDCl}_3$ ):  $\delta$  = -64.07 (s, 3F); HRMS (EI):  $m/z$  calcd for  $\text{C}_{16}\text{H}_{13}\text{F}_3\text{O}_2$   $[\text{M}]^+$  294.0868, found 294.0865.

*1-(2,5-Dimethylphenyl)-3,3,3-trifluoropropyl formate (3e)*

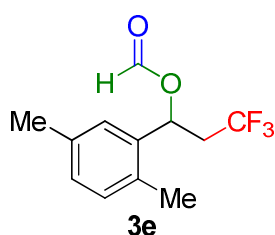

Following the general procedure, 1,4-dimethyl-2-vinylbenzene **1e** (317 mg, 2.4 mmol, 1.2 equiv), **2** (876 mg, 2.0 mmol, 1.0 equiv), DMF (10.0 mL),  $\text{H}_2\text{O}$  (36  $\mu\text{L}$ , 2.0 mmol, 1.0 equiv) and  $\text{Ru}(\text{bpy})_3(\text{PF}_6)_2$  (8.6 mg, 0.01 mmol, 0.5 mol %) irradiated by 4 W white LEDs for 6.0 h. After purification by silica gel column chromatography using 0-5 % ethyl acetate in hexanes as the eluent, the title compound was obtained as a colorless oil (325.8 mg, 66%).  $^1\text{H}$  NMR (400 MHz,  $\text{CDCl}_3$ ):  $\delta$  = 2.32 (s, 3H), 2.39 (s, 3H), 2.42-2.49 (m, 1H), 2.74-2.87 (m, 1H), 6.39 (dd,  $J$  = 9.4, 3.0 Hz, 1H), 7.02-7.07 (m, 2H), 7.15 (s, 1H), 8.06 (s, 1H);  $^{13}\text{C}$  NMR (100 MHz,  $\text{CDCl}_3$ ):  $\delta$  = 18.23, 20.84, 39.81 (q,  $J$  = 28.3 Hz), 65.94 (q,  $J$  = 2.7 Hz), 125.16 (q,  $J$  = 275.7 Hz), 126.12, 129.36, 130.66, 131.55, 136.12, 136.31, 159.35;  $^{19}\text{F}$  NMR (376 MHz,  $\text{CDCl}_3$ ):  $\delta$  = -64.60 (s, 3F); HRMS (EI):  $m/z$  calcd for  $\text{C}_{12}\text{H}_{13}\text{F}_3\text{O}_2$   $[\text{M}]^+$  246.0868, found 246.0860.

*3,3,3-Trifluoro-1-(4-fluorophenyl)propyl formate (3f)*

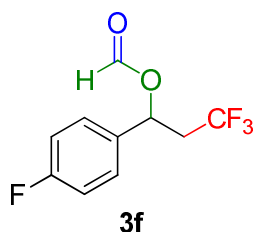

Following the general procedure, 1-fluoro-4-vinylbenzene **1f** (144 mg, 1.2 mmol, 1.2 equiv), **2** (438 mg, 1.0 mmol, 1.0 equiv), DMF (5.0 mL),  $\text{H}_2\text{O}$  (18  $\mu\text{L}$ , 1.0 mmol, 1.0 equiv) and  $\text{Ru}(\text{bpy})_3(\text{PF}_6)_2$  (4.3 mg, 0.005 mmol, 0.5 mol %) irradiated by 4 W white LEDs for 6.0 h. After purification by silica gel column chromatography using 0-5 % ethyl acetate in hexanes as the eluent, the title compound was obtained as a colorless oil (181.2 mg, 77%).  $^1\text{H}$  NMR (400 MHz,  $\text{CDCl}_3$ ):  $\delta$  = 2.49-2.61 (m, 1H),

2.78-2.92 (m, 1H), 6.19 (dd,  $J = 9.2, 4.0$  Hz, 1H), 7.05-7.10 (m, 2H), 7.35-7.38 (m, 2H), 8.05 (s, 1H);  $^{13}\text{C}$  NMR (100 MHz,  $\text{CDCl}_3$ ):  $\delta = 40.09$  (q,  $J = 27.6$  Hz), 68.40 (q,  $J = 3.0$  Hz), 115.85 (q,  $J = 18.0$  Hz), 124.96 (q,  $J = 275.7$  Hz), 128.36 (d,  $J = 8.0$  Hz), 133.82 (d,  $J = 3.0$  Hz), 159.28, 162.83 (d,  $J = 249.5$  Hz);  $^{19}\text{F}$  NMR (376 MHz,  $\text{CDCl}_3$ ):  $\delta = -112.40$  (s, 1F),  $-64.14$  (s, 3F); HRMS (EI):  $m/z$  calcd for  $\text{C}_{10}\text{H}_8\text{F}_4\text{O}_2$   $[\text{M}]^+$  236.0460, found 236.0462.

*1-(4-Bromophenyl)-3,3,3-trifluoropropyl formate (3g)*

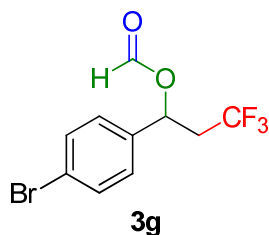

Following the general procedure, 1-bromo-4-vinylbenzene **1g** (220 mg, 1.2 mmol, 1.2 equiv), **2** (438 mg, 1.0 mmol, 1.0 equiv), DMF (5.0 mL),  $\text{H}_2\text{O}$  (18  $\mu\text{L}$ , 1.0 mmol, 1.0 equiv) and  $\text{Ru}(\text{bpy})_3(\text{PF}_6)_2$  (4.3 mg, 0.005 mmol, 0.5 mol %) irradiated by 4 W white LEDs for 6.0 h. After purification by silica gel column chromatography using 0-5 % ethyl acetate in hexanes as the eluent, the title compound was obtained as a colorless oil (242.8 mg, 82%).  $^1\text{H}$  NMR (400 MHz,  $\text{DMSO}-d_6$ ):  $\delta = 2.88$ -3.01 (m, 1H), 3.07-3.21 (m, 1H), 6.11 (dd,  $J = 9.2, 4.0$  Hz, 1H), 7.44 (d,  $J = 8.4$  Hz, 2H), 7.61 (d,  $J = 8.4$  Hz, 2H), 8.32 (s, 1H);  $^{13}\text{C}$  NMR (100 MHz,  $\text{CDCl}_3$ ):  $\delta = 39.99$  (q,  $J = 27.7$  Hz), 68.43 (q,  $J = 3.0$  Hz), 122.99, 124.83 (q,  $J = 275.7$  Hz), 128.07, 132.04, 136.85, 159.19;  $^{19}\text{F}$  NMR (376 MHz,  $\text{CDCl}_3$ ):  $\delta = -64.01$  (s, 3F); HRMS (EI):  $m/z$  calcd for  $\text{C}_{10}\text{H}_8\text{BrF}_3\text{O}_2$   $[\text{M}]^+$  295.9660, found 295.9656.

*1-(4-Chlorophenyl)-3,3,3-trifluoropropyl formate (3h)*

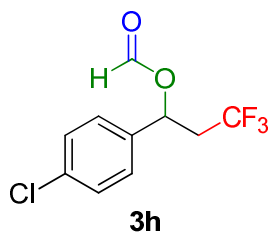

Following the general procedure, 1-chloro-4-vinylbenzene **1h** (166 mg, 1.2 mmol, 1.2 equiv), **2** (438 mg, 1.0 mmol, 1.0 equiv), DMF (5.0 mL),  $\text{H}_2\text{O}$  (18  $\mu\text{L}$ , 1.0 mmol, 1.0 equiv) and  $\text{Ru}(\text{bpy})_3(\text{PF}_6)_2$  (4.3 mg, 0.005 mmol, 0.5 mol %) irradiated by 4 W white LEDs for 6.0 h. After purification by silica gel column chromatography using 0-5 % ethyl acetate in hexanes as the eluent, the title compound was obtained as a colorless oil (194.0 mg, 77%).  $^1\text{H}$  NMR (400 MHz,  $\text{CDCl}_3$ ):  $\delta = 2.48$ -2.61 (m, 1H), 2.77-2.91 (m, 1H), 6.17 (dd,  $J = 9.0, 4.2$  Hz, 1H), 7.31 (d,  $J = 8.4$  Hz, 2H), 7.37 (d,  $J = 8.4$  Hz, 2H), 8.05

(s, 1 H);  $^{13}\text{C}$  NMR (100 MHz,  $\text{CDCl}_3$ ):  $\delta = 39.93$  (q,  $J = 28.7$  Hz), 68.34 (q,  $J = 3.0$  Hz), 124.88 (q,  $J = 275.0$  Hz), 127.77, 129.01, 134.76, 136.36, 159.21;  $^{19}\text{F}$  NMR (376 MHz,  $\text{CDCl}_3$ ):  $\delta = -64.02$  (s, 3F); HRMS (EI):  $m/z$  calcd for  $\text{C}_{10}\text{H}_8\text{ClF}_3\text{O}_2$   $[\text{M}]^+$  252.0165, found 252.0174.

*1-(3-Chlorophenyl)-3,3,3-trifluoropropyl formate (3i)*

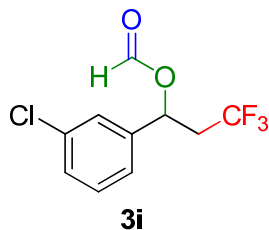

Following the general procedure, 1-chloro-3-vinylbenzene **1i** (333 mg, 2.4 mmol, 1.2 equiv), **2** (876 mg, 2.0 mmol, 1.0 equiv), DMF (10.0 mL),  $\text{H}_2\text{O}$  (36  $\mu\text{L}$ , 2.0 mmol, 1.0 equiv) and  $\text{Ru}(\text{bpy})_3(\text{PF}_6)_2$  (8.6 mg, 0.01 mmol, 0.5 mol %) irradiated by 4 W white LEDs for 6.0 h. After purification by silica gel column chromatography using 0-5 % ethyl acetate in hexanes as the eluent, the title compound was obtained as a colorless oil (258.0 mg, 51%).  $^1\text{H}$  NMR (400 MHz,  $\text{DMSO}-d_6$ ):  $\delta = 2.92$ -3.04 (m, 1H), 3.10-3.24 (m, 1H), 6.13 (dd,  $J = 9.2, 3.2$  Hz, 1H), 7.45 (bs, 3H), 7.59 (s, 1H), 8.34 (s, 1H);  $^{13}\text{C}$  NMR (100 MHz,  $\text{CDCl}_3$ ):  $\delta = 40.03$  (q,  $J = 28.7$  Hz), 68.24 (q,  $J = 3.3$  Hz), 124.53, 124.86 (q,  $J = 276.3$  Hz), 126.43, 129.07, 130.16, 134.74, 139.85, 159.12;  $^{19}\text{F}$  NMR (376 MHz,  $\text{CDCl}_3$ ):  $\delta = -64.07$  (s, 3F); HRMS (EI):  $m/z$  calcd for  $\text{C}_{10}\text{H}_8\text{ClF}_3\text{O}_2$   $[\text{M}]^+$  252.0165, found 252.0172.

*1-(2-Chlorophenyl)-3,3,3-trifluoropropyl formate (3j)*

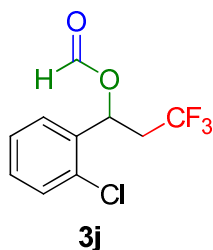

Following the general procedure, 1-chloro-2-vinylbenzene **1j** (333 mg, 2.4 mmol, 1.2 equiv), **2** (876 mg, 2.0 mmol, 1.0 equiv), DMF (10.0 mL),  $\text{H}_2\text{O}$  (36  $\mu\text{L}$ , 2.0 mmol, 1.0 equiv) and  $\text{Ru}(\text{bpy})_3(\text{PF}_6)_2$  (8.6 mg, 0.01 mmol, 0.5 mol %) irradiated by 4 W white LEDs for 6.0 h. After purification by silica gel column chromatography using 0-5 % ethyl acetate in hexanes as the eluent, the title compound was obtained as a colorless oil (247.1 mg, 49%).  $^1\text{H}$  NMR (400 MHz,  $\text{CDCl}_3$ ):  $\delta = 2.60$ -2.78 (m, 2H), 6.59 (dd,  $J = 9.2, 2.8$  Hz, 1H), 7.27-7.34 (m, 2H), 7.39-7.45 (m, 2H), 8.12 (s, 1H);  $^{13}\text{C}$  NMR (100 MHz,  $\text{CDCl}_3$ ):  $\delta = 38.95$  (q,  $J = 28.0$  Hz), 66.02 (q,  $J = 3.0$  Hz), 124.98 (q,  $J = 276.3$  Hz), 126.80, 127.40,



129.82, 129.85, 131.61, 135.68, 158.98;  $^{19}\text{F}$  NMR (376 MHz,  $\text{CDCl}_3$ ):  $\delta = -64.23$  (s, 3F); HRMS (EI):  $m/z$  calcd for  $\text{C}_{10}\text{H}_8\text{ClF}_3\text{O}_2$   $[\text{M}]^+$  252.0165, found 252.0179.

*1-(4-Cyanophenyl)-3,3,3-trifluoropropyl formate (3k)*

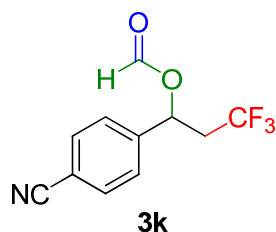

Following the general procedure, 4-vinylbenzonitrile **1k** (310 mg, 2.4 mmol, 1.2 equiv), **2** (876 mg, 2.0 mmol, 1.0 equiv), DMF (10.0 mL),  $\text{H}_2\text{O}$  (36  $\mu\text{L}$ , 2.0 mmol, 1.0 equiv) and  $\text{Ru}(\text{bpy})_3(\text{PF}_6)_2$  (8.6 mg, 0.01 mmol, 0.5 mol %) irradiated by 4 W white LEDs for 6.0 h. After purification by silica gel column chromatography using 5-15 % ethyl acetate in hexanes as the eluent, the title compound was obtained as a colorless oil (267.4 mg, 55%).  $^1\text{H}$  NMR (400 MHz,  $\text{CDCl}_3$ ):  $\delta = 2.51$ -2.63 (m, 1H), 2.78-2.91 (m, 1H), 6.21 (q,  $J = 8.8, 4.4$  Hz, 1H), 7.50 (d,  $J = 8.4$  Hz, 2H), 7.70 (d,  $J = 8.4$  Hz, 2H), 8.08 (s, 1H);  $^{13}\text{C}$  NMR (100 MHz,  $\text{CDCl}_3$ ):  $\delta = 39.81$  (q,  $J = 28.7$  Hz), 68.22 (q,  $J = 3.0$  Hz), 112.81, 118.00, 124.64 (q,  $J = 275.7$  Hz), 127.02, 132.63, 142.66, 159.03;  $^{19}\text{F}$  NMR (376 MHz,  $\text{CDCl}_3$ ):  $\delta = -63.86$  (s, 3F); HRMS (EI):  $m/z$  calcd for  $\text{C}_{11}\text{H}_8\text{F}_3\text{NO}_2$   $[\text{M}]^+$  243.0507, found 243.0509

*3,3,3-Trifluoro-1-(4-(trifluoromethyl)phenyl)propyl formate (3l)*

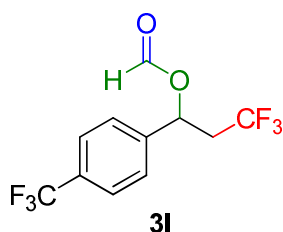

Following the general procedure, 1-(trifluoromethyl)-4-vinylbenzene **1l** (413 mg, 2.4 mmol, 1.2 equiv), **2** (876 mg, 2.0 mmol, 1.0 equiv), DMF (10.0 mL),  $\text{H}_2\text{O}$  (36  $\mu\text{L}$ , 2.0 mmol, 1.0 equiv) and  $\text{Ru}(\text{bpy})_3(\text{PF}_6)_2$  (8.6 mg, 0.01 mmol, 0.5 mol %) irradiated by 4 W white LEDs for 6.0 h. After purification by silica gel column chromatography using 0-5 % ethyl acetate in hexanes as the eluent, the title compound was obtained as a colorless oil (310.0 mg, 54%).  $^1\text{H}$  NMR (400 MHz,  $\text{CDCl}_3$ ):  $\delta = 2.51$ -2.64 (m, 1H), 2.79-2.93 (m, 1H), 6.24 (q,  $J = 8.8, 3.6$  Hz, 1H), 7.51 (d,  $J = 7.6$  Hz, 2H), 7.66 (d,  $J = 8.0$  Hz, 2H), 8.08 (s, 1H);  $^{13}\text{C}$  NMR (100 MHz,  $\text{CDCl}_3$ ):  $\delta = 40.16$  (q,  $J = 28.7$  Hz), 68.49 (q,  $J = 3.3$  Hz), 123.77 (q,  $J = 270.3$  Hz), 124.85 (q,  $J = 275.7$  Hz), 125.97 (q,  $J = 4.0$  Hz), 126.78, 131.23 (q,  $J = 32.7$  Hz), 141.76, 159.17;  $^{19}\text{F}$  NMR (376 MHz,  $\text{CDCl}_3$ ):  $\delta = -63.99$  (s, 3F), -62.84 (s, 3F); HRMS (EI):  $m/z$

calcd for  $C_{11}H_8F_6O_2$   $[M]^+$  286.0428, found 286.0426

*Methyl 4-(3,3,3-trifluoro-1-(formyloxy)propyl)benzoate (3m)*

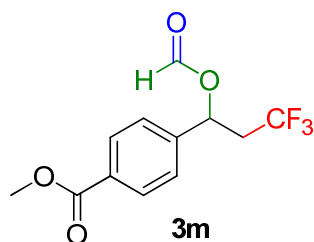

Following the general procedure, methyl 4-vinylbenzoate **1m** (389 mg, 2.4 mmol, 1.2 equiv), **2** (876 mg, 2.0 mmol, 1.0 equiv), DMF (10.0 mL), H<sub>2</sub>O (36  $\mu$ L, 2.0 mmol, 1.0 equiv) and Ru(bpy)<sub>3</sub>(PF<sub>6</sub>)<sub>2</sub> (8.6 mg, 0.01 mmol, 0.5 mol %) irradiated by 4 W white LEDs for 6.0 h. After purification by silica gel column chromatography using 5-20 % ethyl acetate in hexanes as the eluent, the title compound was obtained as a colorless oil (285.5 mg, 52%). <sup>1</sup>H NMR (400 MHz, CDCl<sub>3</sub>):  $\delta$  = 2.51-2.63 (m, 1H), 2.79-2.92 (m, 1H), 3.92 (s, 3H), 6.24 (dd,  $J$  = 8.8, 3.6 Hz, 1H), 7.45 (d,  $J$  = 8.0 Hz, 2H), 8.06 (d,  $J$  = 8.4 Hz, 2H), 8.08 (s, 1H); <sup>13</sup>C NMR (100 MHz, CDCl<sub>3</sub>):  $\delta$  = 39.99 (q,  $J$  = 28.7 Hz), 52.11, 68.52 (q,  $J$  = 3.3 Hz), 124.82 (q,  $J$  = 276.0 Hz), 126.24, 130.10, 130.66, 142.51, 159.16, 166.23; <sup>19</sup>F NMR (376 MHz, CDCl<sub>3</sub>):  $\delta$  = -63.99 (s, 3F); HRMS (EI):  $m/z$  calcd for  $C_{12}H_{11}F_3O_4$   $[M]^+$  276.0609, found 276.0609.

*4-(3,3,3-Trifluoro-1-(formyloxy)propyl)phenyl acetate (3n)*

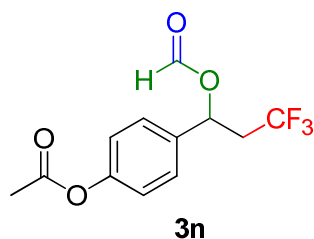

Following the general procedure, 4-vinylphenyl acetate **1n** (389 mg, 2.4 mmol, 1.2 equiv), **2** (876 mg, 2.0 mmol, 1.0 equiv), DMF (10.0 mL), H<sub>2</sub>O (36  $\mu$ L, 2.0 mmol, 1.0 equiv) and Ru(bpy)<sub>3</sub>(PF<sub>6</sub>)<sub>2</sub> (8.6 mg, 0.01 mmol, 0.5 mol %) irradiated by 4 W white LEDs for 6.0 h. After purification by silica gel column chromatography using 0-5 % ethyl acetate in hexanes as the eluent, the title compound was obtained as a white solid (418.1 mg, 76%). <sup>1</sup>H NMR (400 MHz, CDCl<sub>3</sub>):  $\delta$  = 2.30 (s, 3H), 2.49-2.61 (m, 1H), 2.78-2.92 (m, 1H), 6.22 (dd,  $J$  = 9.2, 3.2 Hz, 1H), 7.12 (d,  $J$  = 8.4 Hz, 2H), 7.39 (d,  $J$  = 8.4 Hz, 2H), 8.05 (s, 1H); <sup>13</sup>C NMR (100 MHz, CDCl<sub>3</sub>):  $\delta$  = 20.81, 39.96 (q,  $J$  = 28.3 Hz), 68.27 (q,  $J$  = 3.3 Hz), 121.99, 124.91 (q,  $J$  = 275.7 Hz), 127.53, 135.28, 150.86, 159.24, 169.09; <sup>19</sup>F NMR (376 MHz, CDCl<sub>3</sub>):  $\delta$  = -64.15 (s, 3F); HRMS (EI):  $m/z$  calcd for  $C_{12}H_{11}F_3O_4$   $[M]^+$  276.0609, found 276.0617.

*3,3,3-Trifluoro-1-(naphthalen-2-yl)propyl formate (3o)*

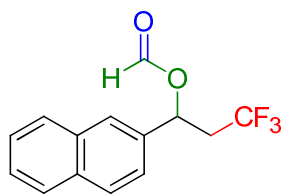

**3o**

Following the general procedure, 2-vinylnaphthalene **1o** (370 mg, 2.4 mmol, 1.2 equiv), **2** (876 mg, 2.0 mmol, 1.0 equiv), DMF (10.0 mL), H<sub>2</sub>O (36  $\mu$ L, 2.0 mmol, 1.0 equiv) and Ru(bpy)<sub>3</sub>(PF<sub>6</sub>)<sub>2</sub> (8.6 mg, 0.01 mmol, 0.5 mol %) irradiated by 4 W white LEDs for 6.0 h. After purification by silica gel column chromatography using 0-5 % ethyl acetate in hexanes as the eluent, the title compound was obtained as a colorless oil (333.5 mg, 62%). <sup>1</sup>H NMR (400 MHz, CDCl<sub>3</sub>):  $\delta$  = 2.60-2.72 (m, 1H), 2.89-3.03 (m, 1H), 6.39 (dd,  $J$  = 9.2, 3.6 Hz, 1H), 7.46-7.54 (m, 3H), 7.84-7.90 (m, 4H), 8.11 (s, 1H); <sup>13</sup>C NMR (100 MHz, CDCl<sub>3</sub>):  $\delta$  = 40.10 (q,  $J$  = 28.3 Hz), 69.17 (q,  $J$  = 3.0 Hz), 123.35 125.08 (q,  $J$  = 275.7 Hz), 125.96, 126.60, 126.67, 127.67, 128.04, 128.91, 132.95, 133.29, 135.06, 159.38; <sup>19</sup>F NMR (376 MHz, CDCl<sub>3</sub>):  $\delta$  = -64.05 (s, 3F); HRMS (EI):  $m/z$  calcd for C<sub>14</sub>H<sub>11</sub>F<sub>3</sub>O<sub>2</sub> [M]<sup>+</sup> 268.0711, found 268.0714.

*1-(4-Tert-butylphenyl)-3,3,3-trifluoropropyl acetate (4b)*

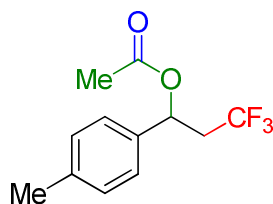

**4b**

Following the general procedure, 1-methyl-4-vinylbenzene **1b** (283 mg, 2.4 mmol, 1.2 equiv), **2** (876 mg, 2.0 mmol, 1.0 equiv), DMA (10.0 mL), H<sub>2</sub>O (36  $\mu$ L, 2.0 mmol, 1.0 equiv) and Ru(bpy)<sub>3</sub>(PF<sub>6</sub>)<sub>2</sub> (8.6 mg, 0.01 mmol, 0.5 mol %) irradiated by 4 W white LEDs for 6.0 h. After purification by silica gel column chromatography using 0-5 % ethyl acetate in hexanes as the eluent, the title compound was obtained as a white solid (310 mg, 63%). <sup>1</sup>H NMR (400 MHz, CDCl<sub>3</sub>):  $\delta$  = 2.07 (s, 3H), 2.35 (s, 3H), 2.45-2.57 (m, 1H), 2.73-2.86 (m, 1H), 6.08 (dd,  $J$  = 9.4, 3.8 Hz, 1H), 7.18 (d,  $J$  = 8.0 Hz, 2H), 7.25 (d,  $J$  = 8.0 Hz, 2H); <sup>13</sup>C NMR (100 MHz, CDCl<sub>3</sub>):  $\delta$  = 20.70, 20.92, 40.14 (q,  $J$  = 28.0 Hz), 69.14 (q,  $J$  = 3.0 Hz), 125.22 (q,  $J$  = 275.5 Hz), 126.22, 129.36, 135.66, 138.48, 169.39; <sup>19</sup>F NMR (376 MHz, CDCl<sub>3</sub>):  $\delta$  = -64.16 (s, 3F); HRMS (EI):  $m/z$  calcd for C<sub>12</sub>H<sub>13</sub>F<sub>3</sub>O<sub>2</sub> [M]<sup>+</sup> 246.0868, found 246.0847.

*1-(4-Tert-butylphenyl)-3,3,3-trifluoropropyl acetate (4c)*

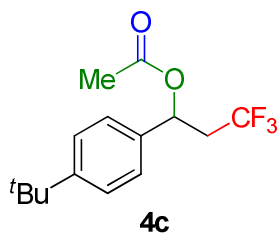

Following the general procedure, 1-tert-butyl-4-vinylbenzene **1c** (384 mg, 2.4 mmol, 1.2 equiv), **2** (876 mg, 2.0 mmol, 1.0 equiv), DMA (10.0 mL), H<sub>2</sub>O (36  $\mu$ L, 2.0 mmol, 1.0 equiv) and Ru(bpy)<sub>3</sub>(PF<sub>6</sub>)<sub>2</sub> (8.6 mg, 0.01 mmol, 0.5 mol %) irradiated by 4 W white LEDs for 6.0 h. After purification by silica gel column chromatography using 0-5 % ethyl acetate in hexanes as the eluent, the title compound was obtained as a colorless oil (354.2 mg, 61%). <sup>1</sup>H NMR (400 MHz, CDCl<sub>3</sub>):  $\delta$  = 1.31 (s, 3H), 2.07 (s, 3H), 2.44-2.57 (m, 1H), 2.73-2.87 (m, 1H), 6.10 (dd,  $J$  = 9.6, 3.6 Hz, 1H), 7.28 (d,  $J$  = 8.0 Hz, 2H), 7.39 (d,  $J$  = 8.4 Hz, 2H); <sup>13</sup>C NMR (100 MHz, CDCl<sub>3</sub>):  $\delta$  = 20.74, 31.13, 34.49, 40.17 (q,  $J$  = 28.0 Hz), 69.02 (q,  $J$  = 3.3 Hz), 125.26 (q,  $J$  = 275.7 Hz), 125.63, 126.01, 135.60, 151.63, 169.42; <sup>19</sup>F NMR (376 MHz, CDCl<sub>3</sub>):  $\delta$  = -64.24 (s, 3F); HRMS (EI):  $m/z$  calcd for C<sub>15</sub>H<sub>19</sub>F<sub>3</sub>O<sub>2</sub> [M]<sup>+</sup> 288.1337, found 288.1339.

*1-(Biphenyl-4-yl)-3,3,3-trifluoropropyl acetate (4d)*

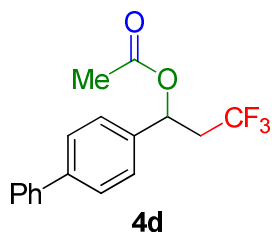

Following the general procedure, 4-vinylbiphenyl **1d** (216 mg, 1.2 mmol, 1.2 equiv), **2** (438 mg, 1.0 mmol, 1.0 equiv), DMA (5.0 mL), H<sub>2</sub>O (18  $\mu$ L, 1.0 mmol, 1.0 equiv) and Ru(bpy)<sub>3</sub>(PF<sub>6</sub>)<sub>2</sub> (4.3 mg, 0.005 mmol, 0.5 mol %) irradiated by 4 W white LEDs for 6.0 h. After purification by silica gel column chromatography using 0-5 % ethyl acetate in hexanes as the eluent, the title compound was obtained as a white solid (201.0 mg, 66%). <sup>1</sup>H NMR (400 MHz, CDCl<sub>3</sub>):  $\delta$  = 2.11 (s, 3H), 2.50-2.63 (m, 1H), 2.78-2.92 (m, 1H), 6.16 (dd,  $J$  = 9.4, 3.8 Hz, 1H), 7.34-7.38 (m, 1H), 7.42-7.47 (m, 4H), 7.56-7.67 (m, 4H); <sup>13</sup>C NMR (100 MHz, CDCl<sub>3</sub>):  $\delta$  = 20.94, 40.29 (q,  $J$  = 28.0 Hz), 69.15 (q,  $J$  = 3.0 Hz), 125.20 (q,  $J$  = 275.7 Hz), 126.76, 127.09, 127.54, 127.56, 128.81, 137.52, 140.36, 141.70, 169.57; <sup>19</sup>F NMR (376 MHz, CDCl<sub>3</sub>):  $\delta$  = -64.11 (s, 3F); HRMS (EI):  $m/z$  calcd for C<sub>17</sub>H<sub>15</sub>F<sub>3</sub>O<sub>2</sub> [M]<sup>+</sup> 308.1024, found 308.0998.

## Control Experiments (Scheme 2, eq 1)

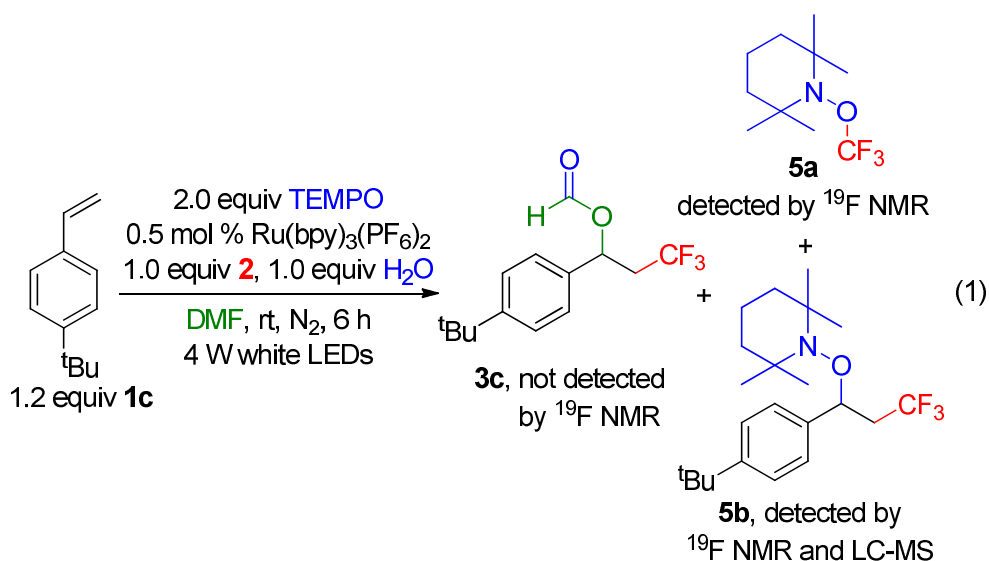

A 10 mL Schlenk tube equipped with a magnetic stir bar was charged with 1-*tert*-butyl-4-vinylbenzene **1c** (384 mg, 2.4 mmol, 1.2 equiv), **2** (876 mg, 2.0 mmol, 1.0 equiv), DMF (10.0 mL), H<sub>2</sub>O (36  $\mu$ L, 2.0 mmol, 1.0 equiv), Ru(bpy)<sub>3</sub>(PF<sub>6</sub>)<sub>2</sub> (8.6 mg, 0.01 mmol, 0.5 mol %) and TEMPO (625 mg, 4.0 mmol, 2.0 equiv). The mixture was evacuated and back-filled with nitrogen three times. The tube was irradiated for 6 h by a 4 W white LED lamp placed at a distance of 1-2 cm. After that, the reaction mixture was analyzed by *in situ* <sup>19</sup>F NMR and LC-MS. No peak of **3c** was found in *in situ* <sup>19</sup>F NMR spectrum, however, as expected, both peaks of product **5a** and **5b** were found in *in situ* <sup>19</sup>F NMR spectrum. **5b** was also detected (See supporting information), HRMS (ESI):  $m/z$  calcd for C<sub>22</sub>H<sub>38</sub>F<sub>3</sub>N<sub>2</sub>O [M+NH<sub>4</sub>]<sup>+</sup> 403.2931, found 403.2935.

## D-Labeling Experiment (Scheme 2, eq 2)

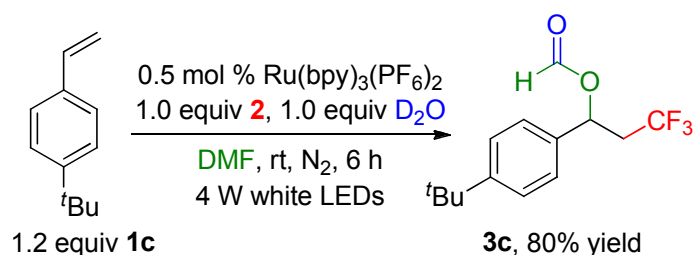

A 20 mL Schlenk tube equipped with a magnetic stir bar was charged with 1-*tert*-butyl-4-vinylbenzene **1c** (384 mg, 2.4 mmol, 1.2 equiv), **2** (876 mg, 2.0 mmol, 1.0 equiv), DMF (10.0 mL), D<sub>2</sub>O (36  $\mu$ L, 2.0 mmol, 1.0 equiv, 99.9% D,  $d$ : 1.107) and Ru(bpy)<sub>3</sub>(PF<sub>6</sub>)<sub>2</sub> (8.6 mg, 0.01 mmol, 0.5 mol %) irradiated by 4 W white LEDs for 6.0 h. After that, 40 mL of water was added to the reaction mixture, which was then extracted with ethyl acetate (100 mL $\times$ 3). The combined

organic phases were washed with water, dried over MgSO<sub>4</sub> and concentrated in vacuum. The residue was purified by silica gel column chromatography using 0-5% ethyl acetate in hexanes as the eluent, the no deuterated product **3c** was obtained as a colorless oil (436.7 mg, 80%). The product was confirmed by <sup>1</sup>H NMR.

#### D-Labeling Experiment (Scheme 2, eq 3)

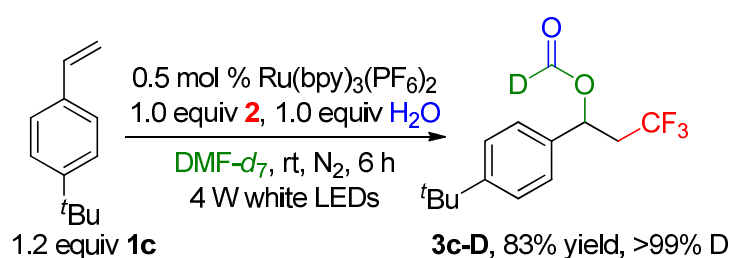

A 10 mL Schlenk tube equipped with a magnetic stir bar was charged with 1-*tert*-butyl-4-vinylbenzene **1c** (192 mg, 1.2 mmol, 1.2 equiv), **2** (438 mg, 1.0 mmol, 1.0 equiv), DMF-*d*<sub>7</sub> (5.0 mL, 99.5% D), H<sub>2</sub>O (18  $\mu$ L, 1.0 mmol, 1.0 equiv) and Ru(bpy)<sub>3</sub>(PF<sub>6</sub>)<sub>2</sub> (4.3 mg, 0.005 mmol, 0.5 mol %) irradiated by 4 W white LEDs for 6.0 h. After that, 20 mL of water was added to the reaction mixture, which was then extracted with ethyl acetate (50 mL $\times$ 3). The combined organic phases were washed with water, dried over MgSO<sub>4</sub> and concentrated in vacuum. The residue was purified by silica gel column chromatography using 0-5% ethyl acetate in hexanes as the eluent, the title deuterated product **3c-D** was obtained as a colorless oil (228.4 mg, 83%, >99% D). <sup>1</sup>H NMR (400 MHz, CDCl<sub>3</sub>):  $\delta$  = 1.31 (s, 9H), 2.49-2.62 (m, 1H), 2.79-2.93 (m, 1H), 6.22 (dd, *J* = 9.2, 3.6 Hz, 1H), 7.30 (d, *J* = 8.4 Hz, 2H), 7.40 (d, *J* = 8.4 Hz, 2H); <sup>13</sup>C NMR (100 MHz, CDCl<sub>3</sub>):  $\delta$  = 31.15, 34.57, 40.13 (q, *J* = 28.0 Hz), 68.77 (q, *J* = 3.0 Hz), 125.13 (q, *J* = 275.7 Hz), 125.78, 126.13, 134.89, 152.07, 159.21 (t, *J* = 34.5 Hz); <sup>19</sup>F NMR (376 MHz, CDCl<sub>3</sub>):  $\delta$  = -64.21 (s, 3F); HRMS (EI): *m/z* calcd for C<sub>14</sub>H<sub>16</sub>DF<sub>3</sub>O<sub>2</sub> [M]<sup>+</sup> 275.1243, found 275.1231.

## O<sup>18</sup>-Labeling Experiment (Scheme 2, eqs 4 and 5)

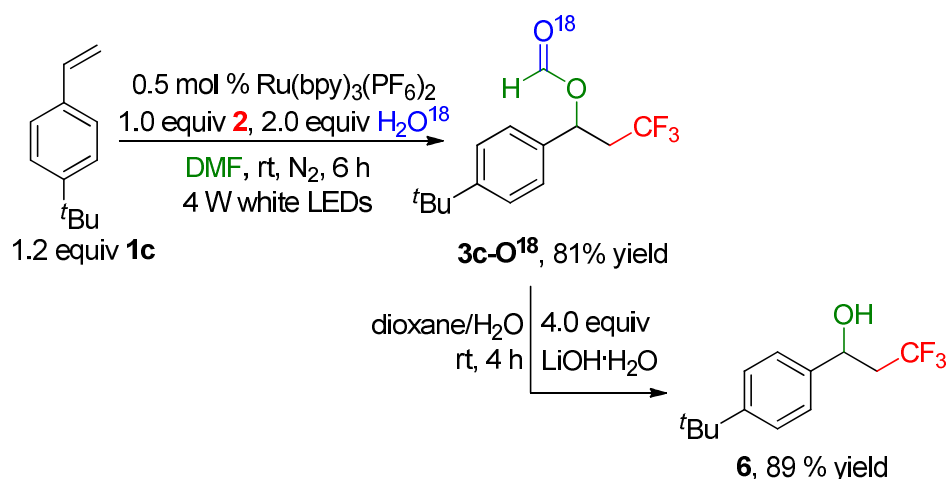

A 20 mL Schlenk tube equipped with a magnetic stir bar was charged with 1-tert-butyl-4-vinylbenzene **1c** (384 mg, 2.4 mmol, 1.2 equiv), **2** (876 mg, 2.0 mmol, 1.0 equiv), DMF (10.0 mL), H<sub>2</sub>O<sup>18</sup> (72  $\mu$ L, 4.0 mmol, 2.0 equiv) and Ru(bpy)<sub>3</sub>(PF<sub>6</sub>)<sub>2</sub> (8.6 mg, 0.01 mmol, 0.5 mol %) irradiated by 4 W white LEDs for 6.0 h. After that, 40 mL of water was added to the reaction mixture, which was then extracted with ethyl acetate (100 mL $\times$ 3). The combined organic phases were washed with water, dried over MgSO<sub>4</sub> and concentrated in vacuum. The residue was purified by silica gel column chromatography using 0-5 % ethyl acetate in hexanes as the eluent, the O<sup>18</sup>-labeling product **3c-O<sup>18</sup>** was obtained as a colorless oil (447.3 mg, 81%). <sup>1</sup>H NMR (400 MHz, CDCl<sub>3</sub>):  $\delta$  = 1.31 (s, 9H), 2.49-2.62 (m, 1H), 2.79-2.93 (m, 1H), 6.22 (dd,  $J$  = 9.6, 3.2 Hz, 1H), 7.30 (d,  $J$  = 8.4 Hz, 2H), 7.40 (d,  $J$  = 8.4 Hz, 2H), 8.06 (s, 1H); <sup>13</sup>C NMR (100 MHz, CDCl<sub>3</sub>):  $\delta$  = 31.16, 34.58, 40.15 (q,  $J$  = 28.3 Hz), 68.84 (q,  $J$  = 3.3 Hz), 125.12 (q,  $J$  = 275.7 Hz), 125.79, 126.14, 134.89, 152.08, 159.39; <sup>19</sup>F NMR (376 MHz, CDCl<sub>3</sub>):  $\delta$  = -64.21 (s, 3F); HRMS (EI):  $m/z$  calcd for C<sub>14</sub>H<sub>17</sub>F<sub>3</sub><sup>16</sup>O<sup>18</sup> [M]<sup>+</sup> 276.1223, found 276.1210.

To a solution of **3c-O<sup>18</sup>** (442.0mg, 1.6 mmol, 1.0 equiv) in dioxane (5 mL) and water (5 mL) was added lithium hydroxide monohydrate (268.5mg, 6.4 mmol, 4.0 equiv). The reaction mixture was stirred at room temperature for 4 hours. After removal of dioxane by evaporation under vacuum, the remaining aqueous phase was neutralized with 2N HCl and extracted with ethyl acetate (30 mL $\times$ 3). The combined organic phases were washed with water, dried over MgSO<sub>4</sub> and concentrated in vacuum. The residue was purified by silica gel column chromatography using 5-10 % ethyl acetate in hexanes as the eluent, the title product 1-(4-(tert-butyl)phenyl)-3,3,3-trifluoropropyl formate (**6**) was obtained as a colorless oil (350.1 mg, 89%). <sup>1</sup>H NMR (400 MHz, CDCl<sub>3</sub>):  $\delta$  = 1.32 (s, 9H), 2.12 (s,

1H), 2.39-2.51 (m, 1H), 2.57-2.71 (m, 1H), 5.04-5.08 (m, 1H), 7.31 (d,  $J = 8.4$  Hz, 2H), 7.41 (d,  $J = 8.4$  Hz, 2H);  $^{13}\text{C}$  NMR (100 MHz,  $\text{CDCl}_3$ ):  $\delta = 31.21, 34.50, 40.51$  (q,  $J = 26.7$  Hz), 68.41 (q,  $J = 3.0$  Hz), 125.41, 125.63, 125.90 (q,  $J = 275.7$  Hz), 139.40, 151.36;  $^{19}\text{F}$  NMR (376 MHz,  $\text{CDCl}_3$ ):  $\delta = -63.77$  (s, 3F); HRMS (EI):  $m/z$  calcd for  $\text{C}_{13}\text{H}_{17}\text{F}_3\text{O}$   $[\text{M}]^+$  246.1232, found 276.1236.

### Light-dark interval experiment (Scheme 3)

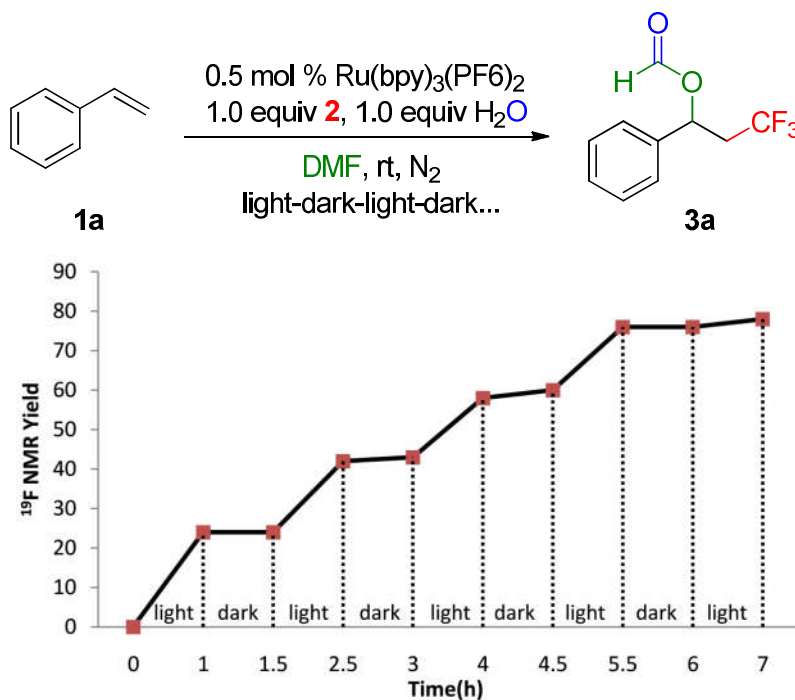

A 10 mL Schlenk tube equipped with a magnetic stir bar was charged with styrene **1a** (125 mg, 1.2 mmol, 1.2 equiv), Umemoto reagent **2** (438 mg, 1.0 mmol, 1.0 equiv), and  $\text{Ru}(\text{bpy})_3(\text{PF}_6)_2$  (4.3 mg, 0.005 mmol, 0.5 mol %). The mixture was evacuated and back-filled with nitrogen three times. Then DMF (5.0 mL),  $\text{H}_2\text{O}$  (18  $\mu\text{L}$ , 1.0 mmol, 1.0 equiv) and 1-chloro-4-(trifluoromethyl)benzene (134  $\mu\text{L}$ , 1.0 mmol, 1.0 equiv) was added to the tube *via* syringe. The tube was irradiated for by a 4 W white LED lamp placed at a distance of 1-2 cm. The yield was determined by  $^{19}\text{F}$  NMR spectroscopies of an aliquot from the reaction mixture with 1-chloro-4-(trifluoromethyl)benzene as an internal standard.

### Quantum Yield Measurement

The quantum yield ( $\Phi$ ) of the photochemical reaction was measured according to the procedure reported by Melchiorre's group (M. Silvi, C. Verrier, Y. P. Rey, L. Buzzetti and P. Melchiorre, *Nat.*



*Chem.*, 2017, **9**, 868.) and Gong's group (X. Shen, Y. Li, Z. Wen, S. Cao, X. Hou and L. Gong, *Chem. Sci.*, 2018, **9**, 4562).

A ferrioxalate actinometer solution was prepared according to the literature (S. L. Murov, Ed. *Handbook of Photochemistry*, Marcel Dekker, New York, 1973), and used for determination of photon flux of the light source. Under irradiation, the ferrioxalate actinometer solution undergoes decomposition from ferric ions to ferrous ions, which are complexed by 1,10-phenanthroline and monitored by UV/Vis absorbance at 510 nm. The moles of iron-phenanthroline complex formed are related to moles of photons absorbed.

**Preparation of the stock solutions:**

Potassium ferrioxalate solution: potassium ferrioxalate (294.8 mg) and sulfuric acid (139  $\mu$ L) were added to a 50 mL volumetric flask, and filled to the mark with deionized water. Phenanthroline solution: 1,10-phenanthroline (100 mg) was added to a 50 mL volumetric flask, and filled to the mark with deionized water. Buffer solution: sodium acetate (2.47 g) and sulfuric acid (0.5 mL) were added to a 50 mL volumetric flask, and filled to the mark with deionized water. Model reaction solution: 1-*tert*-butyl-4-vinylbenzene **1c** (192 mg, 1.2 mmol), **2** (438 mg, 1.0 mmol), H<sub>2</sub>O (18  $\mu$ L, 1.0 mmol) and Ru(bpy)<sub>3</sub>(PF<sub>6</sub>)<sub>2</sub> (4.3 mg, 0.005 mmol, 0.5 mol %) were sequentially added to a 25 mL volumetric flask and filled to the mark with *N,N*-dimethylformamide. *Note: all the stock solutions were prepared and stored in the dark.*

**Actinometry measurements:**

The actinometer solution (potassium ferrioxalate in water, 1.0 mL) and the model reaction solution (**1c** with **2** catalyzed by Ru(bpy)<sub>3</sub>(PF<sub>6</sub>)<sub>2</sub> in DMF, 1.0 mL) were added to two identical Schlenk tubes (diameter = 12 mm) respectively. The Schlenk tubes were placed 2 cm away from the light source. They were irradiated together with a 4 W white LEDs Lamp without stirring. This procedure was repeated 4 times, quenching the two reactions after different time intervals: 45 sec, 60 sec, 75 sec, and 90 sec for the actinometry solution; 30 min, 60 min, 90 min, and 120 min for the model reaction. After irradiation, the actinometer solution was removed and placed in a 10 mL volumetric flask containing 1,10-phenanthroline solution (0.5 mL) and buffer solution (2 mL). This flask was filled to the mark with deionized water. The UV-Vis spectra of the complexed actinometer samples were recorded for each time interval. The absorbance of the complexed actinometer solution was monitored at 510 nm. (**Fig. S1**).

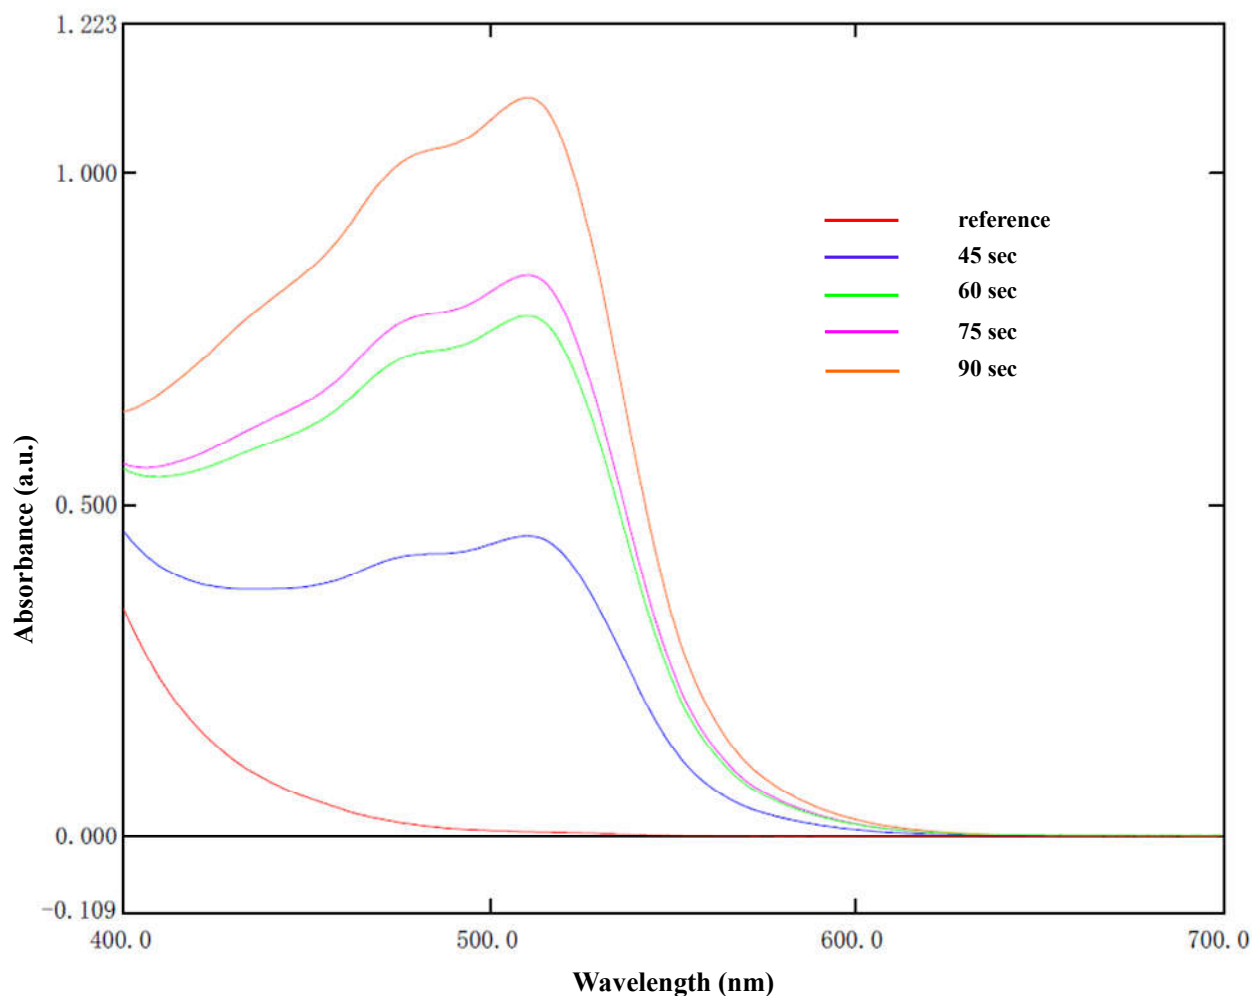

**Fig. S1** UV - Vis spectra of the complexed actinometer samples at each time interval (45 sec, 60 sec, 75 sec, and 90 sec).

**Calculation of photon flux of the light source:**

Moles of  $\text{Fe}^{2+}$  formed for each sample is determined using Beers' Law (**Eq. 1**)

$$\text{Moles of Fe(II)} = \frac{V_1 \times V_3 \times \Delta A(510 \text{ nm})}{10^3 \times V_2 \times l \times \epsilon(510 \text{ nm})} \quad (\text{Eq. 1})$$

$V_1$  is the irradiated volume (1.0 mL),  $V_2$  is the aliquot of the irradiated solution taken for the determination of the ferrous ions (1.0 mL),  $V_3$  is the final volume after complexation with phenanthroline (10 mL),  $l$  is the optical path-length of the irradiation cell (1.0 cm),  $\Delta A(510 \text{ nm})$  is the optical difference in absorbance between the irradiated solution and the one stored in the dark,  $\epsilon(510 \text{ nm})$  is the extinction coefficient the complex  $\text{Fe}(\text{phen})_3^{2+}$  at 510 nm ( $11100 \text{ L mol}^{-1} \text{ cm}^{-1}$ ). The moles of  $\text{Fe}^{2+}$  formed ( $x$ ) are plotted as a function of time ( $t$ ) (**Fig. S2**).

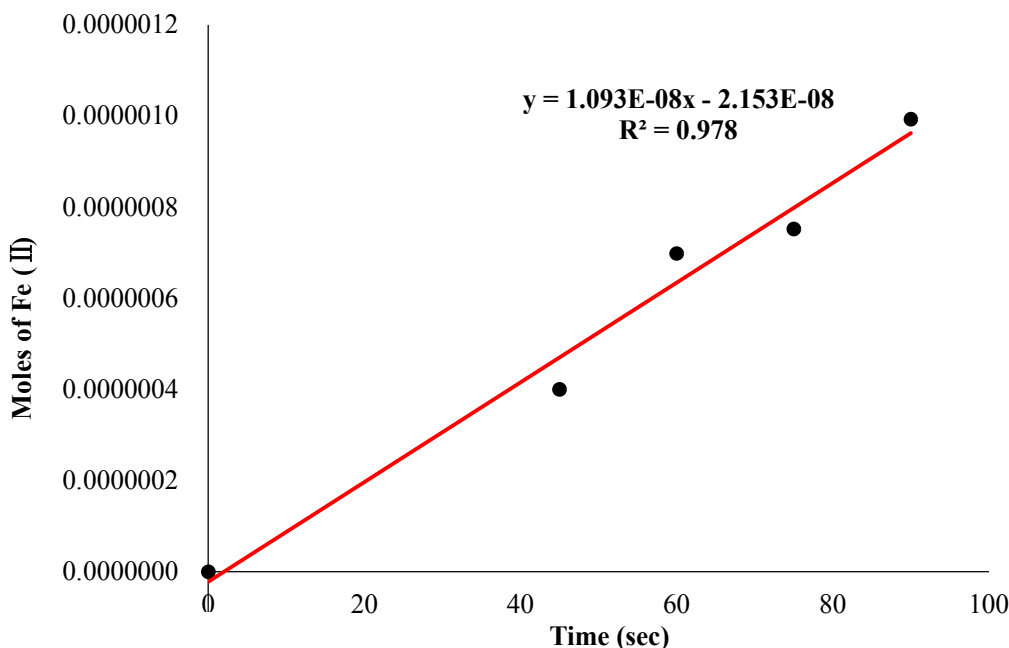

**Fig. S2** The moles of  $\text{Fe}^{2+}$  formed (x) versus time (t).

The slope of this line was correlated to the moles of incident photons by unit of time ( $q_{n,p}^0$ ) by the use of the following **Eq. 2**:

$$\Phi(\lambda) = \frac{dx/dt}{q_{n,p}^0 [1 - 10^{-A(\lambda)}]} \quad (\text{Eq. 2})$$

$dx/dt$  is the rate of change of a measurable quantity (spectral or any other property), the quantum yield ( $\Phi$ ) for  $\text{Fe}^{2+}$  at 400 nm is 1.13 (C. G. Hatchard and C. A. Parker, *Proc. R. Soc. Lond. A* 1956, **235**, 518–536),  $[1 - 10^{-A(\lambda)}]$  is the ratio of absorbed photons by the solution, and  $A(\lambda)$  is the absorbance of the actinometer at the wavelength used to carry out the experiments (400 nm). The absorbance at 400 nm  $A(400)$  was measured using a Shimadzu UV-2550 UV-Vis spectrophotometer in a 10 mm path quartz cuvette, obtaining an absorbance of 2.52.

#### **Calculation of quantum yield of the photochemical reaction:**

The moles of product **3c** formed for the model reaction were determined by  $^{19}\text{F}$  NMR. The moles of product per unit of time are related to the number of photons absorbed. The photons absorbed are correlated to the number of incident photons by the use of **Eq. 2**. According to this, if we plot the moles of product (x) versus the moles of incident photons ( $q_{n,p}^0 \cdot dt$ ), the slope is equal to:  $\Phi \cdot (1 - 10^{-A(\lambda)})$ , where  $\Phi$  is the quantum yield to be determined and  $A(400 \text{ nm})$  is the absorption of the reaction under study (**Fig. S3**).

A(400 nm) was measured using a Shimadzu UV-2550 UV-Vis spectrophotometer in 10 mm path quartz. An absorbance of 1.61 was determined for the model reaction mixture.

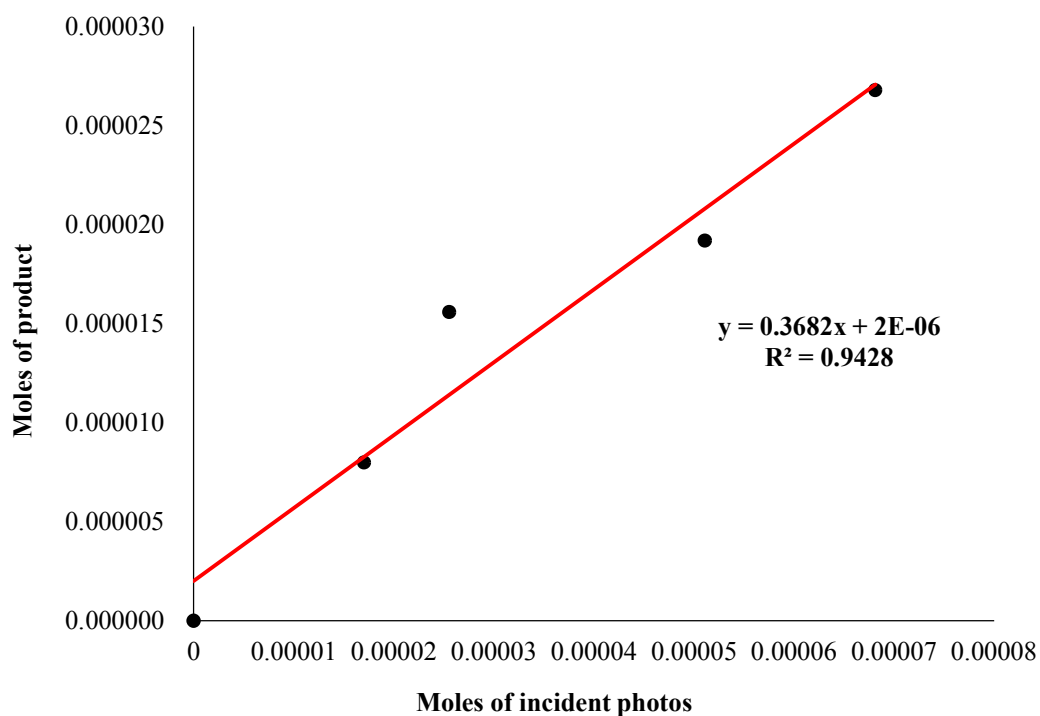

**Fig. S3** The moles of product (x) versus the moles of incident photons ( $q_{n,p}^0 \cdot dt$ ).

The quantum yield ( $\Phi$ ) of the photochemical reaction of **1c** with **2** catalyzed by  $\text{Ru}(\text{bpy})_3(\text{PF}_6)_2$  was calculated to be **0.39**.

GCH-II-007-4 CDCl<sub>3</sub>

NAME 170928  
 EXPNO 26  
 PROCNO 1  
 Date\_ 20170928  
 Time 13.56  
 INSTRUM spect  
 PROBHD 5 mm PABBO BB-  
 PULPROG zg30  
 TD 65536  
 SOLVENT CDCl<sub>3</sub>  
 NS 16  
 DS 2  
 SWH 8223.685 Hz  
 FIDRES 0.125483 Hz  
 AQ 3.9846387 sec  
 RG 203  
 DW 60.800 usec  
 DE 6.50 usec  
 TE 1533.0 K  
 D1 1.0000000 sec  
 TD0 1

8.069  
7.812  
7.397  
7.389  
7.378  
7.377  
7.371  
7.361  
7.351  
7.344  
7.336  
7.330  
7.260  
6.234  
6.225  
6.211  
6.202

2.831  
2.826  
2.822  
2.868  
2.858  
2.843  
2.833  
2.819  
2.795  
2.620  
2.620  
2.604  
2.594  
2.578  
2.567  
2.555  
2.541  
2.530  
2.514  
2.514  
1.543

0.000

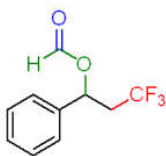

3a

<sup>1</sup>H NMR (400 MHz, CDCl<sub>3</sub>)

===== CHANNEL f1 =====  
 NUC1 1H  
 P1 13.96 usec  
 PL1 -2.10 dB  
 PL1W 14.17683315 W  
 SFO1 400.1424710 MHz  
 SI 32768  
 SF 400.1400097 MHz  
 WDW EM  
 SSB 0  
 LB 0.30 Hz  
 GB 0  
 PC 1.00

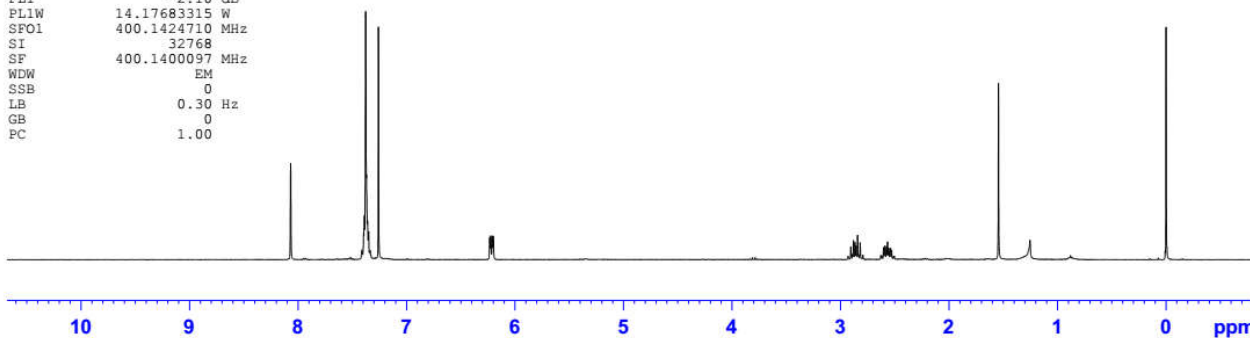

GCH-II-007-4 CDCl<sub>3</sub>

159.36  
137.90  
129.18  
128.97  
128.88  
128.82  
128.75  
128.66  
120.31

77.32  
77.00  
76.68  
69.12  
69.09  
69.05  
69.02

40.66  
40.38  
40.09  
39.81

NAME 170928  
 EXPNO 41  
 PROCNO 1  
 Date\_ 20170928  
 Time 20.13  
 INSTRUM spect  
 PROBHD 5 mm PABBO BB-  
 PULPROG zgpg30  
 TD 65536  
 SOLVENT CDCl<sub>3</sub>  
 NS 1024  
 DS 4  
 SWH 24038.461 Hz  
 FIDRES 0.366798 Hz  
 AQ 1.3631988 sec  
 RG 203  
 DW 20.800 usec  
 DE 6.50 usec  
 TE 1794.0 K  
 D1 2.0000000 sec  
 D11 0.0300000 sec  
 TD0 1

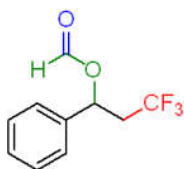

3a

<sup>13</sup>C NMR (100 MHz, CDCl<sub>3</sub>)

===== CHANNEL f1 =====  
 NUC1 13C  
 P1 9.00 usec  
 PL1 -2.00 dB  
 PL1W 53.74446869 W  
 SFO1 100.6253446 MHz

===== CHANNEL f2 =====  
 CPDPRG2 waltz16  
 NUC2 1H  
 PCPD2 90.00 usec  
 PL2 -2.10 dB  
 PL12 14.09 dB  
 PL13 13.52 dB  
 PL2W 14.17683315 W  
 PL12W 0.34086251 W  
 PL13W 0.38866836 W  
 SFO2 400.1416006 MHz  
 SI 32768  
 SF 100.6152897 MHz  
 WDW EM  
 SSB 0  
 LB 1.00 Hz  
 GB 0  
 PC 1.40

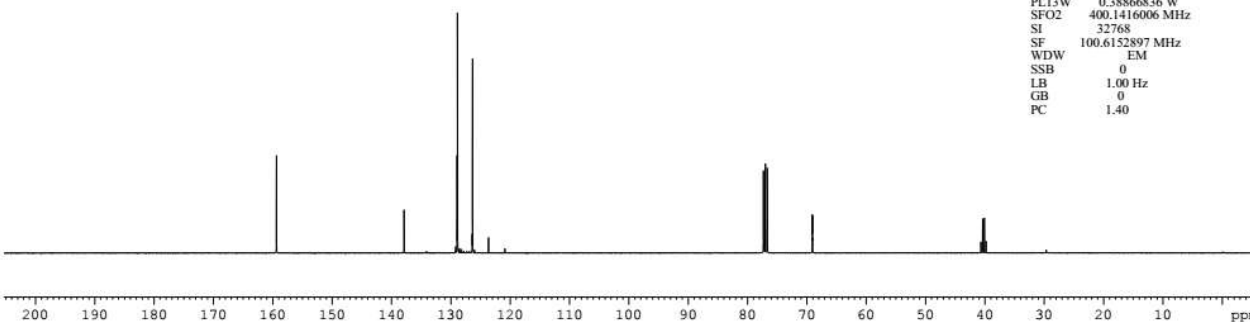

GCH-II-007-4 CDC13

-64.14

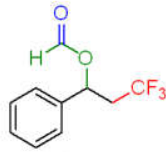

3a  
<sup>19</sup>F NMR (376 MHz, CDCl<sub>3</sub>)

```

NAME      170928
EXPNO     27
PROCNO    1
Date_     20170928
Time      13.57
INSTRUM   spect
PROBHD    5 mm PABBO BB-
PULPROG   zgpg30
TD         131072
SOLVENT   CDCl3
NS         16
DS         4
SWH        89285.711 Hz
FIDRES     0.681196 Hz
AQ         0.7340532 sec
RG         203
DW         5.600 usec
DE         6.50 usec
TE         1526.6 K
D1         1.00000000 sec
D11        0.03000000 sec
D12        0.00002000 sec
TDO        1

```

```

===== CHANNEL f1 =====
NUC1      19F
PI        14.80 usec
PL1       -3.00 dB
PL1W      19.39594650 W
SFO1      376.4701248 MHz

```

```

===== CHANNEL f2 =====
CPDPRG2   waltz16
NUC2      1H
PCPD2     90.00 usec
PL2       -2.10 dB
PL12      14.09 dB
PL12W     14.17683315 W
PL12W     0.34086251 W
SFO2      400.1416006 MHz
SI         65536
SF         376.5077760 MHz
WDW        EM
SSB        0
LB         0.30 Hz
GB         0
PC         1.00

```

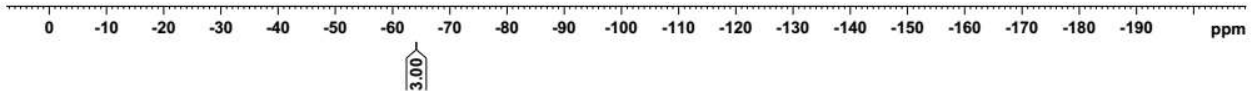

Monoisotopic Mass, Odd and Even Electron Ions

45 formula(e) evaluated with 1 results within limits (up to 50 best isotopic matches for each mass)

Elements Used:

C: 0-12 H: 0-12 O: 0-2 F: 0-4 Cl: 0-2

default file

FK-EIH-2 530 (11.892) Cm (530:531-540:542)

TOF MS EI+  
6.12e+002

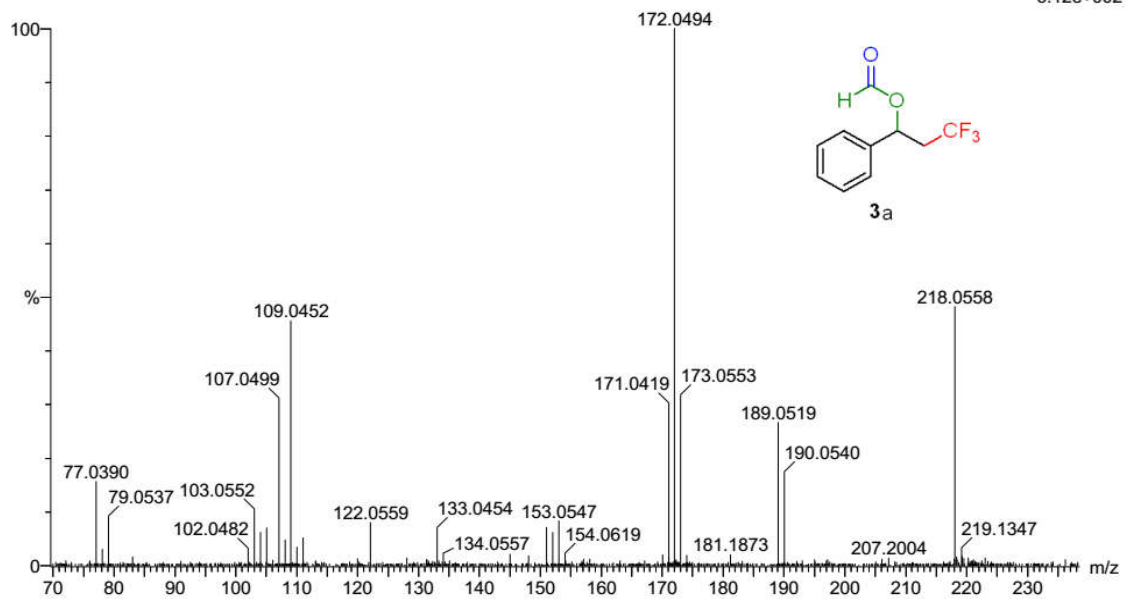

Minimum: -1.5  
Maximum: 5.0 10.0 50.0

| Mass     | Calc. Mass | mDa | PPM | DBE | i-FIT     | Formula      |
|----------|------------|-----|-----|-----|-----------|--------------|
| 218.0558 | 218.0555   | 0.3 | 1.4 | 5.0 | 5546135.0 | C10 H9 O2 F3 |

GCH-II-016-2 DMSO

```

NAME      170930
EXPNO     23
PROCNO    1
Date_     20170930
Time      12.51
INSTRUM   spect
PROBHD    5 mm PABBO BB-
PULPROG   zg30
TD         65536
SOLVENT   DMSO
NS         16
DS         2
SWH       8223.685 Hz
FIDRES    0.125483 Hz
AQ         3.9846387 sec
RG         203
DW         60.800 usec
DE         6.50 usec
TE         1468.2 K
D1         1.00000000 sec
TD0        1
  
```

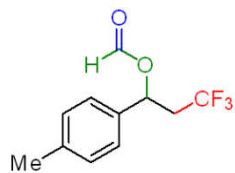

**3b**  
<sup>1</sup>H NMR (400 MHz, DMSO-d<sub>6</sub>)

```

===== CHANNEL f1 =====
NUC1      1H
P1        13.96 usec
PL1       -2.10 dB
PL1W      14.17683315 W
SFO1      400.1424710 MHz
SI         32768
SF         400.1400021 MHz
WDW        EM
SSB        0
LB         0.30 Hz
GB         0
PC         1.00
  
```

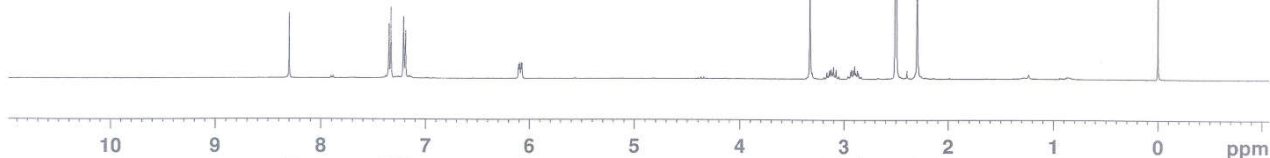

GCH-II-016-2 CDCl<sub>3</sub>

```

NAME      170930
EXPNO     18
PROCNO    1
Date_     20170930
Time      12.29
INSTRUM   spect
PROBHD    5 mm PABBO BB-
PULPROG   zgpg30
TD         65536
SOLVENT   CDCl3
NS         164
DS         4
SWH       24038.461 Hz
FIDRES    0.366798 Hz
AQ         1.3631988 sec
RG         203
DW         20.800 usec
DE         6.50 usec
TE         1427.6 K
D1         2.00000000 sec
D11        0.03000000 sec
TD0        1
  
```

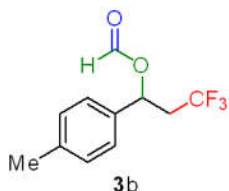

**3b**  
<sup>13</sup>C NMR (100 MHz, CDCl<sub>3</sub>)

```

===== CHANNEL f1 =====
NUC1      13C
P1         9.00 usec
PL1       -2.00 dB
PL1W      53.74446869 W
SFO1      100.6253446 MHz
  
```

```

===== CHANNEL f2 =====
CPDPRG2   waltz16
NUC2      1H
PCPD2     90.00 usec
PL2       -2.10 dB
PL12      14.09 dB
PL13      13.52 dB
PL2W      14.17683315 W
PL12W     0.34086251 W
PL13W     0.33866836 W
SFO2      400.1416006 MHz
SI         32768
SF         100.6152999 MHz
WDW        EM
SSB        0
LB         1.00 Hz
GB         0
PC         1.40
  
```

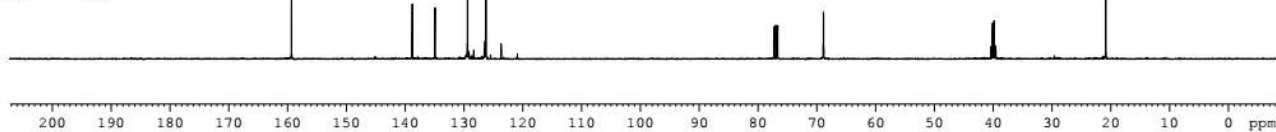

-64.13

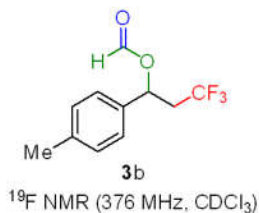

```

NAME      170930
EXPNO    16
PROCNO   1
Date_    20170930
Time     11.04
INSTRUM  spect
PROBHD   5 mm PABBO BB-
PULPROG  zgpg30
TD       131072
SOLVENT  CDCl3
NS       4
DS       4
SWH      89285.711 Hz
FIDRES   0.681196 Hz
AQ       0.7340532 sec
RG       203
DW       5.600 usec
DE       6.50 usec
TE       300.2 K
D1       1.00000000 sec
D11      0.03000000 sec
D12      0.00002000 sec
TD0      1
    
```

```

===== CHANNEL f1 =====
NUC1     19F
P1       14.80 usec
PL1      -3.00 dB
PL1W     19.39594650 W
SFO1     376.4701248 MHz
    
```

```

===== CHANNEL f2 =====
CPDPRG2  waltz16
NUC2     1H
PCPD2    90.00 usec
PL2      -2.10 dB
PL12     14.09 dB
PL2W     14.17683315 W
PL12W    0.34086251 W
SFO2     400.1416006 MHz
SI       65536
SF       376.5077760 MHz
WDW      EM
SSB      0
LB       0.30 Hz
GB       0
PC       1.00
    
```

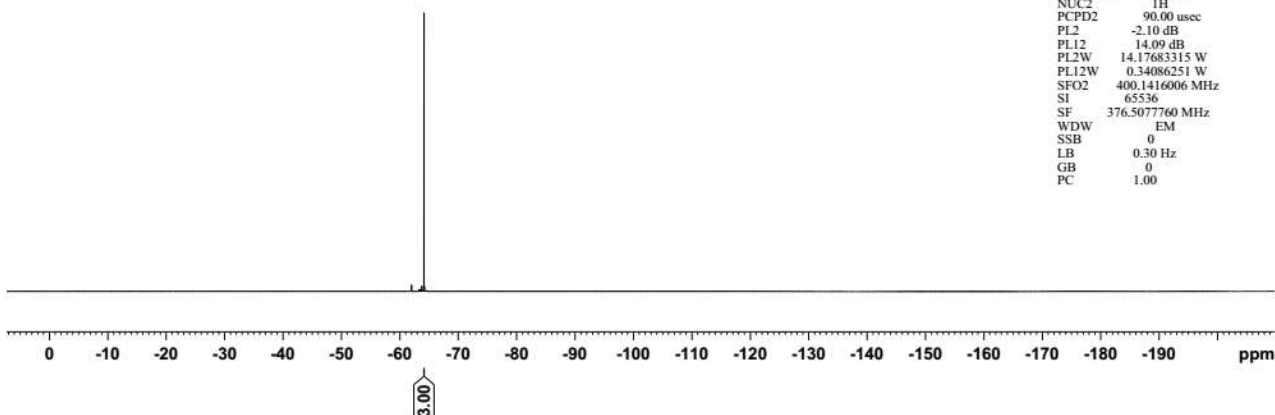

Monoisotopic Mass, Odd and Even Electron Ions  
 29 formula(e) evaluated with 1 results within limits (up to 50 best isotopic matches for each mass)  
 Elements Used:  
 C: 0-12 H: 0-12 O: 0-2 F: 0-4 Br: 0-1

default file  
 FK-EIH 264 (7.459) Cm (263:266-(248:257+279:286))

TOF MS EI+  
 6.58e+003

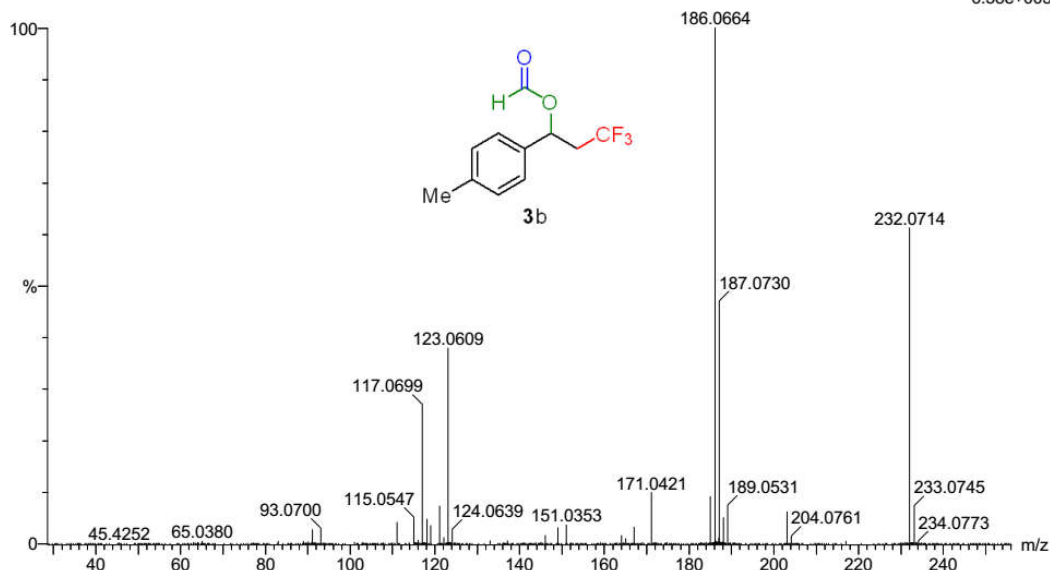

Minimum: -1.5  
 Maximum: 50.0

| Mass     | Calc. Mass | mDa | PPM | DBE | i-FIT | Formula       |
|----------|------------|-----|-----|-----|-------|---------------|
| 232.0714 | 232.0711   | 0.3 | 1.3 | 5.0 | 4.2   | C11 H11 O2 F3 |



GCH-I-039-2 CDC13

```

NAME          180131
EXPNO         3
PROCNO        1
Date_         20180131
Time          9.53
INSTRUM       spect
PROBHD        5 mm PABBO BB-
PULPROG       zg30
TD            65536
SOLVENT       CDC13
NS            16
DS            2
SWH           8223.685 Hz
FIDRES        0.125483 Hz
AQ            3.9846387 sec
RG            114
DW            60.800 usec
DE            6.50 usec
TE            2368.6 K
D1            1.00000000 sec
TDO           1

```

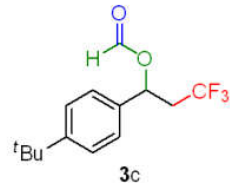

<sup>1</sup>H NMR (400 MHz, CDCl<sub>3</sub>)

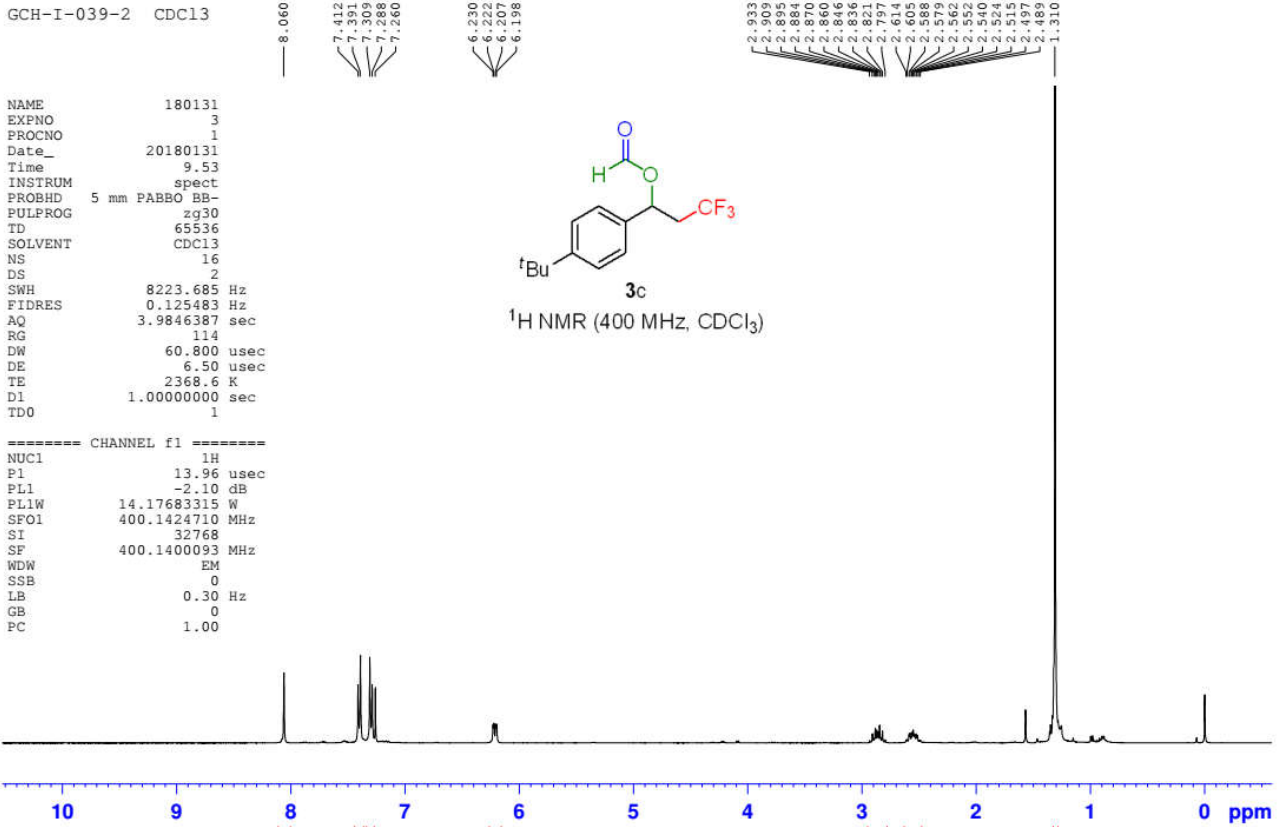

GCJ-I-039-2 CDC13

```

NAME          180129
EXPNO         40
PROCNO        1
Date_         20180129
Time          16.32
INSTRUM       spect
PROBHD        5 mm PABBO BB-
PULPROG       zgpg30
TD            65536
SOLVENT       CDC13
NS            300
DS            4
SWH           24038.461 Hz
FIDRES        0.366798 Hz
AQ            1.3631988 sec
RG            203
DW            20.800 usec
DE            6.50 usec
TE            2278.1 K
D1            2.00000000 sec
D11           0.03000000 sec
TDO           1

```

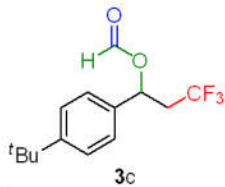

<sup>13</sup>C NMR (100 MHz, CDCl<sub>3</sub>)

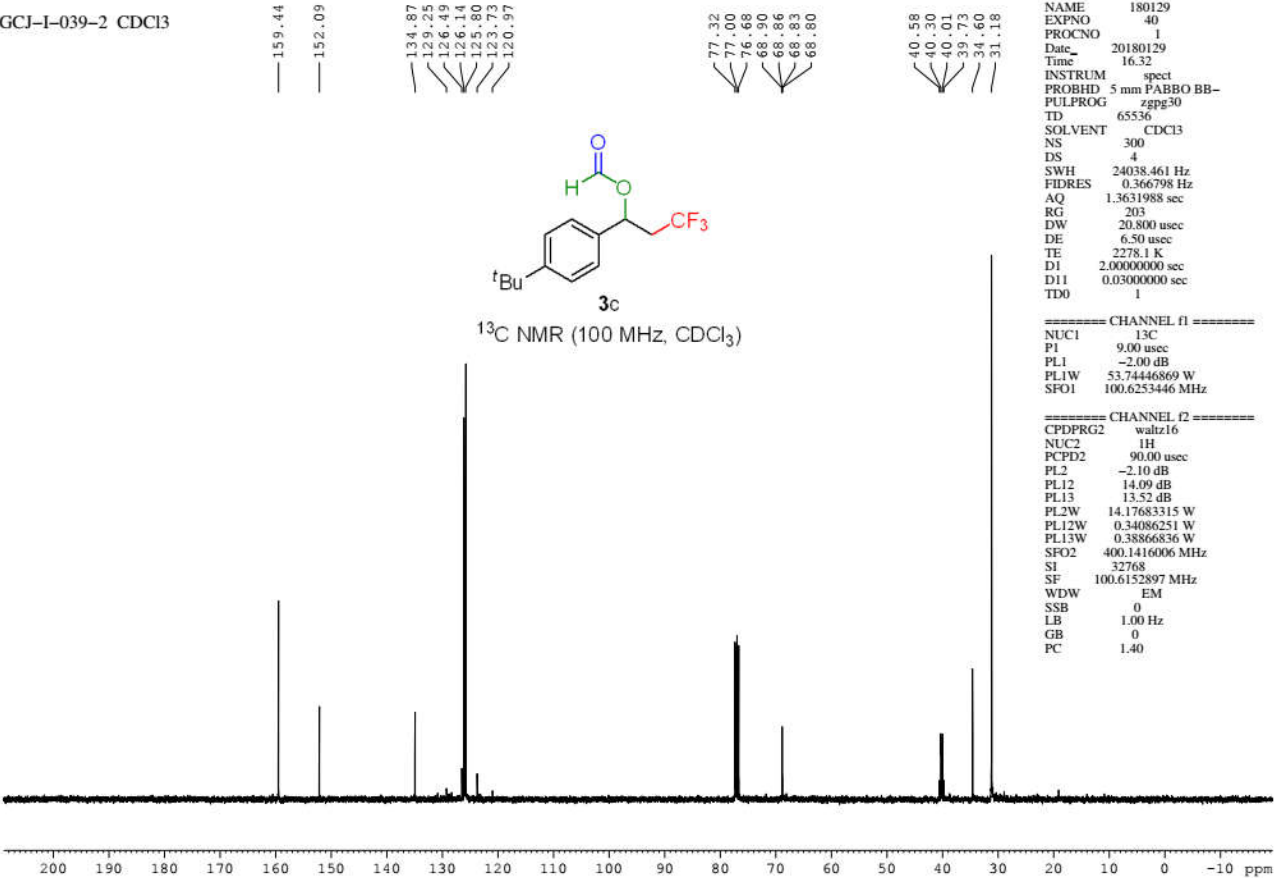

```

NAME          180129
EXPNO         40
PROCNO        1
Date_         20180129
Time          16.32
INSTRUM       spect
PROBHD        5 mm PABBO BB-
PULPROG       zgpg30
TD            65536
SOLVENT       CDC13
NS            300
DS            4
SWH           24038.461 Hz
FIDRES        0.366798 Hz
AQ            1.3631988 sec
RG            203
DW            20.800 usec
DE            6.50 usec
TE            2278.1 K
D1            2.00000000 sec
D11           0.03000000 sec
TDO           1

```

```

===== CHANNEL f1 =====
NUC1          13C
P1            9.00 usec
PL1           -2.00 dB
PL1W          53.74446869 W
SFO1          100.6253446 MHz

```

```

===== CHANNEL f2 =====
CPDPRG2      waltz16
NUC2          1H
PCPD2        90.00 usec
PL2           -2.10 dB
PL12         14.09 dB
PL13         13.52 dB
PL2W         14.17683315 W
PL12W        0.34086251 W
PL13W        0.38866836 W
SFO2         400.1416006 MHz
SI           32768
SF           100.6152897 MHz
WDW           EM
SSB           0
LB            1.00 Hz
GB            0
PC            1.40

```

-64.21

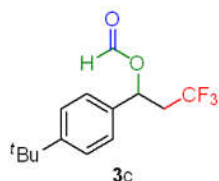

<sup>19</sup>F NMR (376 MHz, CDCl<sub>3</sub>)

```

NAME      180129
EXPNO     37
PROCNO    1
Date_     20180129
Time      16.04
INSTRUM   spect
PROBHD    5 mm PABBO BB-
PULPROG   zgpg30
TD        131072
SOLVENT   CDCl3
NS        16
DS        4
SWH       89285.711 Hz
FIDRES    0.681196 Hz
AQ        0.7340532 sec
RG        203
DW        5.600 usec
DE        6.50 usec
TE        2251.2 K
D1        1.0000000 sec
D11       0.0300000 sec
D12       0.0000200 sec
TD0       1
    
```

```

===== CHANNEL f1 =====
NUC1      19F
P1        14.80 usec
PL1       -3.00 dB
PL1W      19.39594650 W
SFO1      376.4701248 MHz
    
```

```

===== CHANNEL f2 =====
CPDPRG2   walz16
NUC2      1H
PCPD2     90.00 usec
PL2       -2.10 dB
PL12      14.09 dB
PL2W      14.17683315 W
PL12W     0.34086251 W
SFO2      400.1416006 MHz
SI        65536
SF        376.5077760 MHz
WDW       EM
SSB       0
LB        0.30 Hz
GB        0
PC        1.00
    
```

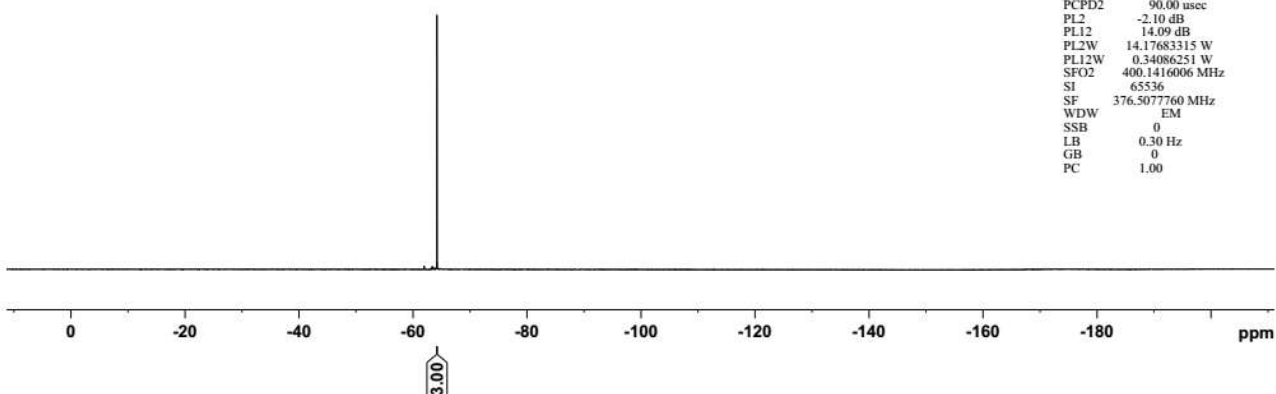

Monoisotopic Mass, Odd and Even Electron Ions

69 formula(e) evaluated with 1 results within limits (up to 50 best isotopic matches for each mass)

Elements Used:

C: 0-30 H: 0-50 O: 0-4 F: 0-3

default file

GCH-H 983 (8.302) Cm (983:984-(988:991+971:974))

TOF MS EI+  
1.38e+004

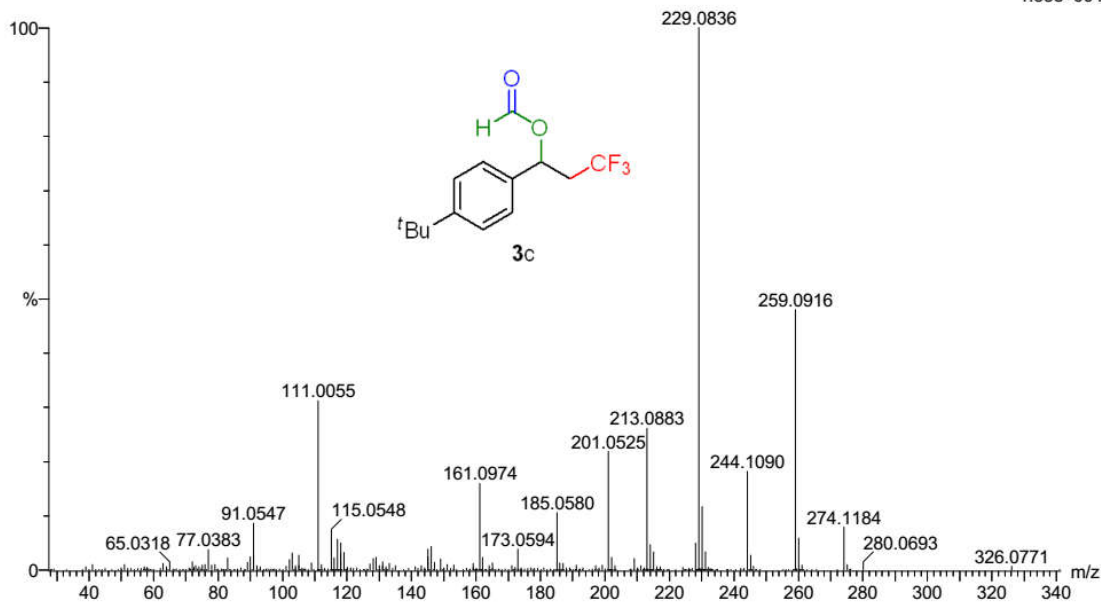

| Mass     | Calc. Mass | mDa | PPM | DBE | i-FIT | Formula       |
|----------|------------|-----|-----|-----|-------|---------------|
| 274.1184 | 274.1181   | 0.3 | 1.1 | 5.0 | 10.0  | C14 H17 O2 F3 |

GCH-I-040-2 CDC13

8.097  
7.621  
7.601  
7.586  
7.583  
7.565  
7.470  
7.469  
7.449  
7.438  
7.433  
7.388  
7.370  
7.351  
7.260  
6.283  
6.274  
6.250

2.975  
2.951  
2.937  
2.926  
2.916  
2.902  
2.888  
2.878  
2.864  
2.839  
2.674  
2.664  
2.648  
2.638  
2.623  
2.611  
2.600  
2.585  
2.575  
2.558  
2.549  
1.556

NAME 180131  
EXPNO 9  
PROCNO 1  
Date\_ 20180131  
Time 13.09  
INSTRUM spect  
PROBHD 5 mm PABBO BB-  
PULPROG zg30  
TD 65536  
SOLVENT CDC13  
NS 16  
DS 2  
SWH 8223.685 Hz  
FIDRES 0.125483 Hz  
AQ 3.9846387 sec  
RG 203  
DW 60.800 usec  
DE 6.50 usec  
TE 2339.4 K  
D1 1.00000000 sec  
TD0 1

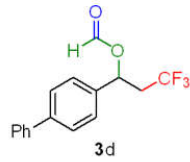

<sup>1</sup>H NMR (400 MHz, CDCl<sub>3</sub>)

===== CHANNEL f1 =====  
NUC1 1H  
P1 13.96 usec  
PL1 -2.10 dB  
PL1W 14.17683315 W  
SFO1 400.1424710 MHz  
SI 32768  
SF 400.1400093 MHz  
WDW EM  
SSB 0  
LB 0.30 Hz  
GB 0  
PC 1.00

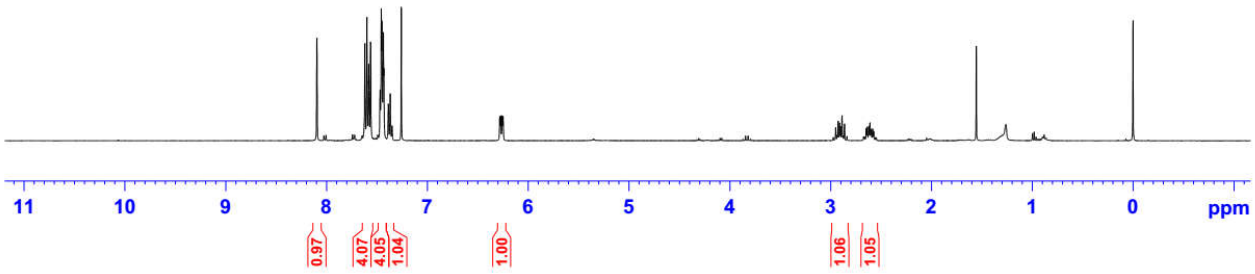

GCH-I-040-2 CDC13

159.44  
141.96  
140.20  
136.74  
129.16  
128.82  
127.64  
127.61  
127.09  
126.84  
126.40  
123.64  
120.88

77.32  
77.00  
76.68  
68.93  
68.90  
68.86  
68.83  
40.60  
40.32  
40.04  
39.75

NAME 180131  
EXPNO 19  
PROCNO 1  
Date\_ 20180131  
Time 15.52  
INSTRUM spect  
PROBHD 5 mm PABBO BB-  
PULPROG zgpg30  
TD 65536  
SOLVENT CDC13  
NS 354  
DS 4  
SWH 24038.461 Hz  
FIDRES 0.366798 Hz  
AQ 1.3631988 sec  
RG 203  
DW 20.800 usec  
DE 6.50 usec  
TE 2517.2 K  
D1 2.00000000 sec  
D11 0.03000000 sec  
TD0 1

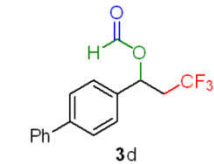

<sup>13</sup>C NMR (100 MHz, CDCl<sub>3</sub>)

===== CHANNEL f1 =====  
NUC1 13C  
P1 9.00 usec  
PL1 -2.00 dB  
PL1W 53.74446869 W  
SFO1 100.6253446 MHz  
===== CHANNEL f2 =====  
CPDPRG2 waltz16  
NUC2 1H  
PCPD2 90.00 usec  
PL2 -2.10 dB  
PL12 14.09 dB  
PL13 13.52 dB  
PL2W 14.17683315 W  
PL12W 0.34086251 W  
PL13W 0.38866836 W  
SFO2 400.1416006 MHz  
SI 32768  
SF 100.6152922 MHz  
WDW EM  
SSB 0  
LB 1.00 Hz  
GB 0  
PC 1.40

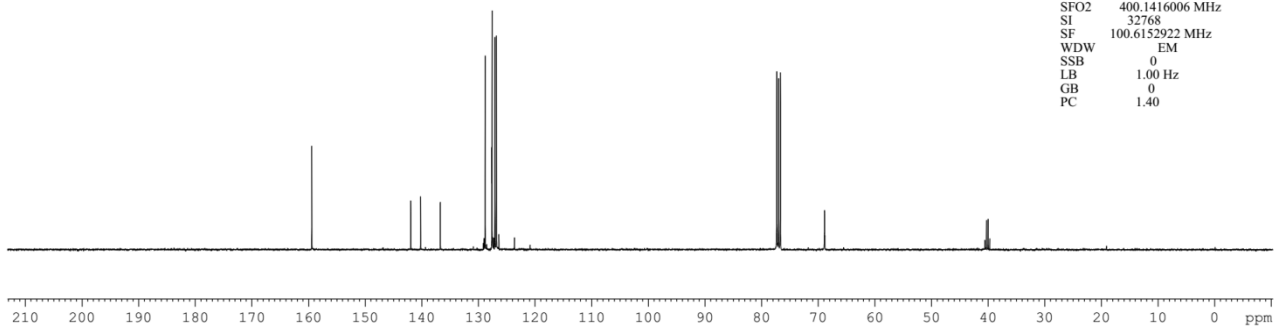

-64.07

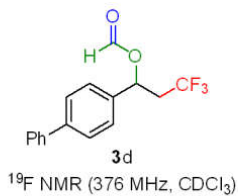

<sup>19</sup>F NMR (376 MHz, CDCl<sub>3</sub>)

```

NAME      180131
EXPNO     10
PROCNO    1
Date_     20180131
Time      13.10
INSTRUM   spect
PROBHD    5 mm PABBO BB-
PULPROG   zgpg30
TD         131072
SOLVENT   CDC13
NS         16
DS         4
SWH        89285.711 Hz
FIDRES     0.681196 Hz
AQ         0.7340532 sec
RG         203
DW         5.600 usec
DE         6.50 usec
TE         2347.6 K
D1         1.00000000 sec
D11        0.03000000 sec
D12        0.00002000 sec
TD0        1
    
```

```

===== CHANNEL f1 =====
NUC1       19F
P1         14.80 usec
PL1        -3.00 dB
PL1W       19.39594650 W
SFO1       376.4701248 MHz

===== CHANNEL f2 =====
CPDPRG2    waltz16
NUC2        1H
PCPD2      90.00 usec
PL2         -2.10 dB
PL12        14.09 dB
PL2W       14.17683315 W
PL12W      0.34086251 W
SFO2       400.1416006 MHz
SI          65536
SF         376.5077760 MHz
WDW         EM
SSB         0
LB          0.30 Hz
GB          0
PC          1.00
    
```

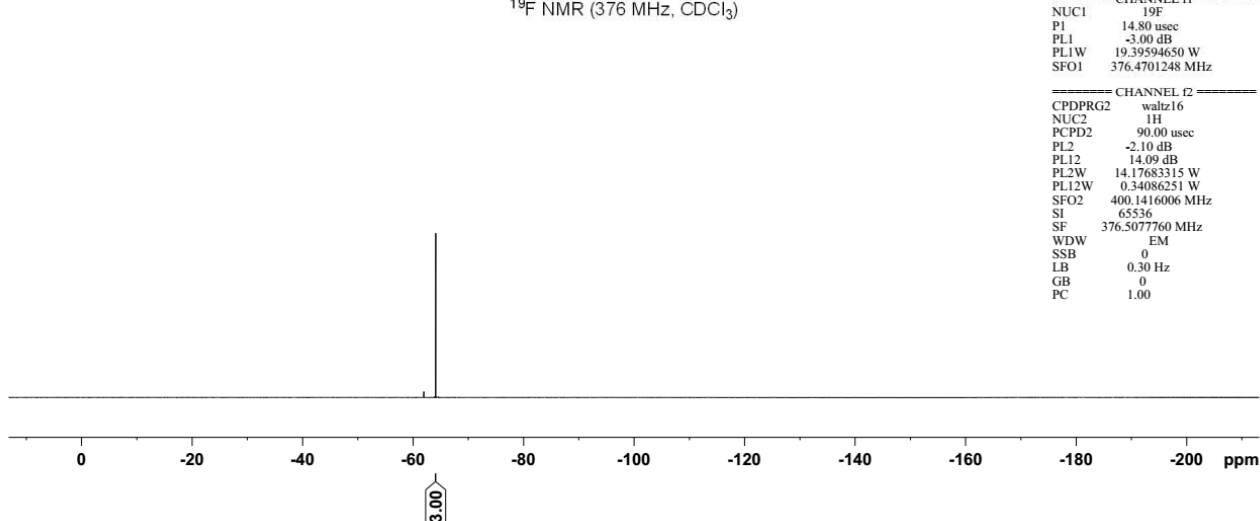

**Monoisotopic Mass, Odd and Even Electron Ions**

16 formula(e) evaluated with 1 results within limits (up to 50 best isotopic matches for each mass)

Elements Used:

C: 0-30 H: 0-50 O: 0-4 F: 3-3

default file

GCH-H 1446 (10.772) Cm (1446-(1434:1438+1451:1455))

TOF MS E+  
3.17e+003

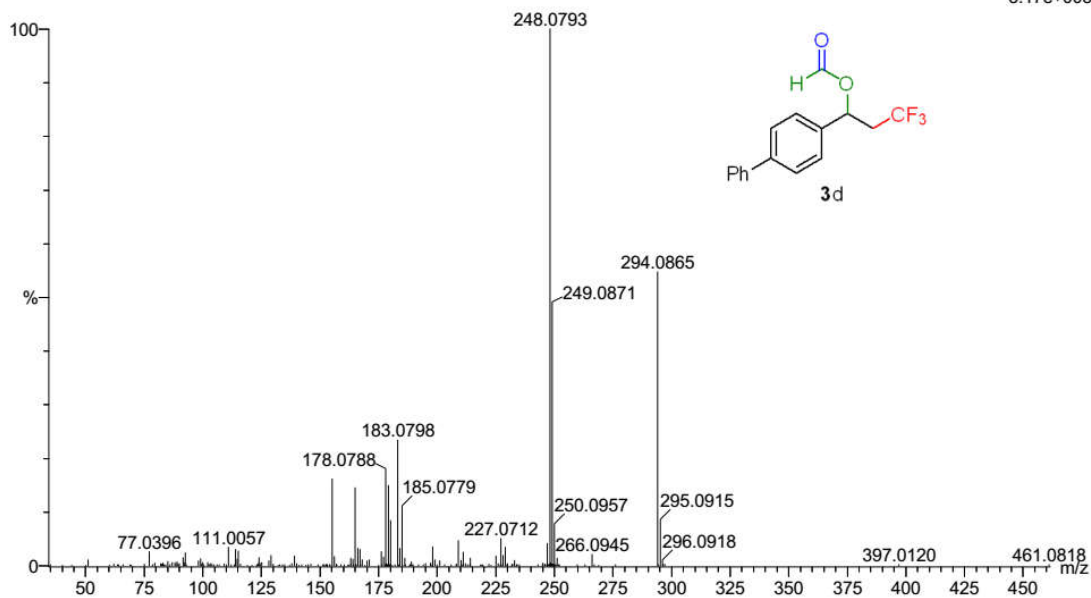

Minimum: -1.5  
Maximum: 50.0

| Mass     | Calc. Mass | mDa  | PPM  | DBE | i-FIT | Formula       |
|----------|------------|------|------|-----|-------|---------------|
| 294.0865 | 294.0868   | -0.3 | -1.0 | 9.0 | 3.1   | C16 H13 O2 F3 |

HZ-GCH-I-031-3 CDCL3

8.062  
7.260  
7.145  
7.082  
7.024  
7.024  
6.402  
6.395  
6.379  
6.371

2.875  
2.850  
2.836  
2.826  
2.812  
2.801  
2.787  
2.777  
2.762  
2.751  
2.491  
2.483  
2.465  
2.456  
2.444  
2.427  
2.418  
2.388  
2.317

NAME 171207  
EXPNO 10  
PROCNO 1  
Date\_ 20171207  
Time 10.40  
INSTRUM spect  
PROBHD 5 mm PABBO BB-  
PULPROG zg30  
TD 65536  
SOLVENT CDCL3  
NS 16  
DS 2  
SWH 8223.685 Hz  
FIDRES 0.125483 Hz  
AQ 3.9846387 sec  
RG 203  
DW 60.800 usec  
DE 6.50 usec  
TE 297.7 K  
D1 1.0000000 sec  
TD0 1

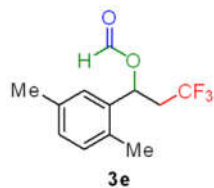

<sup>1</sup>H NMR (400 MHz, CDCl<sub>3</sub>)

===== CHANNEL f1 =====  
NUC1 1H  
P1 13.96 usec  
PL1 -2.10 dB  
PL1W 14.17683315 W  
SFO1 400.1424710 MHz  
SI 32768  
SF 400.1400096 MHz  
WDW EM  
SSB 0  
LB 0.30 Hz  
GB 0  
PC 1.00

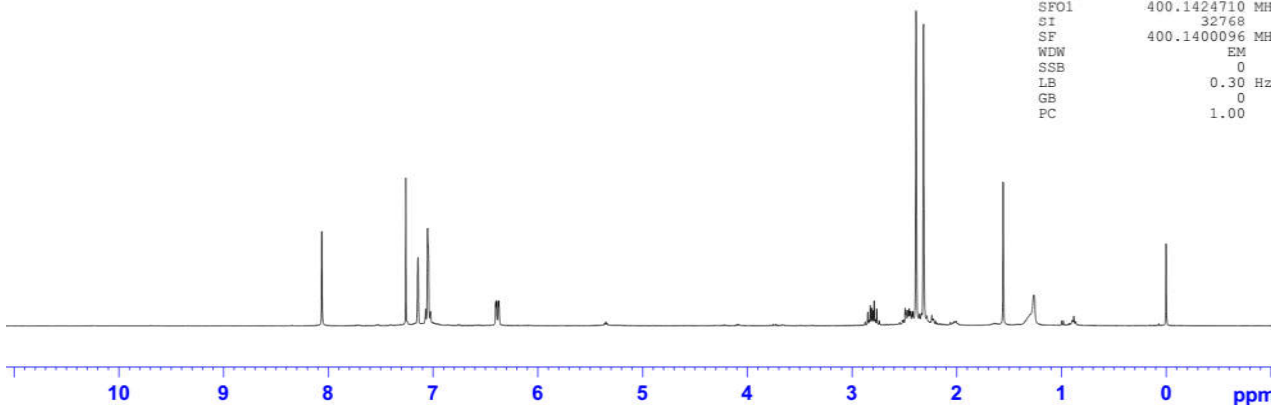

HZ-GCH-I-031-3 CDCL3

159.35  
136.31  
136.12  
131.55  
130.66  
129.36  
129.30  
126.54  
126.12  
123.78  
121.03

77.32  
77.00  
76.68  
65.98  
65.95  
65.92  
65.90  
40.24  
39.95  
39.67  
39.39  
20.84  
18.23

NAME 171207  
EXPNO 11  
PROCNO 1  
Date\_ 20171207  
Time 11.16  
INSTRUM spect  
PROBHD 5 mm PABBO BB-  
PULPROG zgpg30  
TD 65536  
SOLVENT CDCL3  
NS 170  
DS 4  
SWH 24038.461 Hz  
FIDRES 0.366798 Hz  
AQ 1.3631988 sec  
RG 203  
DW 20.800 usec  
DE 6.50 usec  
TE 298.4 K  
D1 2.0000000 sec  
D11 0.0300000 sec  
TD0 1

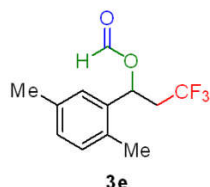

<sup>13</sup>C NMR (100 MHz, CDCl<sub>3</sub>)

===== CHANNEL f1 =====  
NUC1 13C  
P1 9.00 usec  
PL1 -2.00 dB  
PL1W 53.74446869 W  
SFO1 100.6253446 MHz

===== CHANNEL f2 =====  
CPDPRG2 waltz16  
NUC2 1H  
PCPD2 90.00 usec  
PL2 -2.10 dB  
PL12 14.09 dB  
PL13 13.52 dB  
PL2W 14.17683315 W  
PL12W 0.34086251 W  
PL13W 0.38866836 W  
SFO2 400.1416006 MHz  
SI 32768  
SF 100.6152948 MHz  
WDW EM  
SSB 0  
LB 1.00 Hz  
GB 0  
PC 1.40

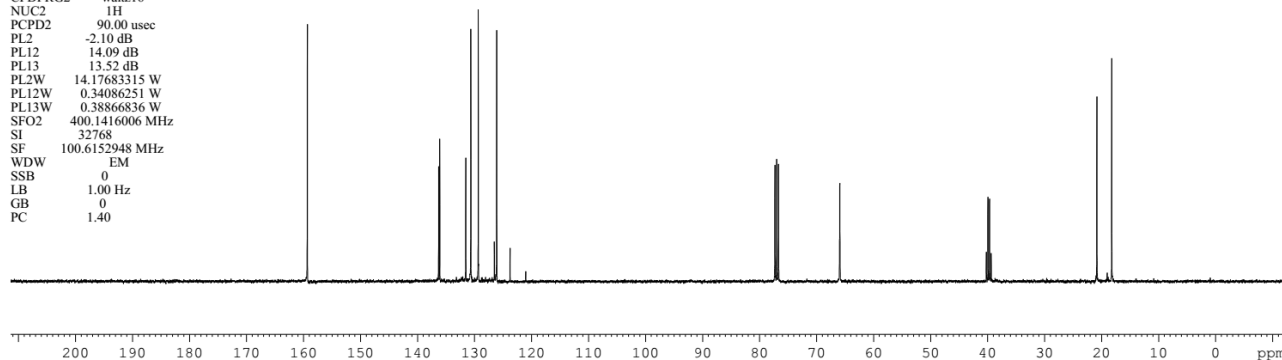

HZ-GCH-I-031-3 CDCL3

-64.60

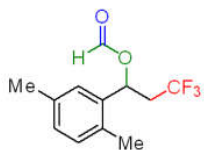

**3e**  
<sup>19</sup>F NMR (376 MHz, CDCl<sub>3</sub>)

```

NAME      171207
EXPNO     3
PROCNO    1
Date_     20171207
Time      9.10
INSTRUM   spect
PROBHD    5 mm PABBO BB-
PULPROG   zgpg30
TD         131072
SOLVENT   CDCl3
NS         16
DS         4
SWH       89285.711 Hz
FIDRES    0.681196 Hz
AQ         0.7340532 sec
RG         203
DW         5.600 usec
DE         6.50 usec
TE         297.6 K
D1         1.00000000 sec
D11        0.03000000 sec
D12        0.00002000 sec
TD0        1
    
```

```

===== CHANNEL f1 =====
NUC1      19F
P1        14.80 usec
PL1       -3.00 dB
PL1W      19.39594650 W
SFO1      376.4701248 MHz
    
```

```

===== CHANNEL f2 =====
CPDPRG2   waltz16
NUC2       1H
PCPD2     90.00 usec
PL2        -2.10 dB
PL12       14.09 dB
PL2W      14.17683315 W
PL12W     0.34086251 W
SFO2      400.1416006 MHz
SI         65536
SF         376.5077760 MHz
WDW        EM
SSB        0
LB         0.30 Hz
GB         0
PC         1.00
    
```

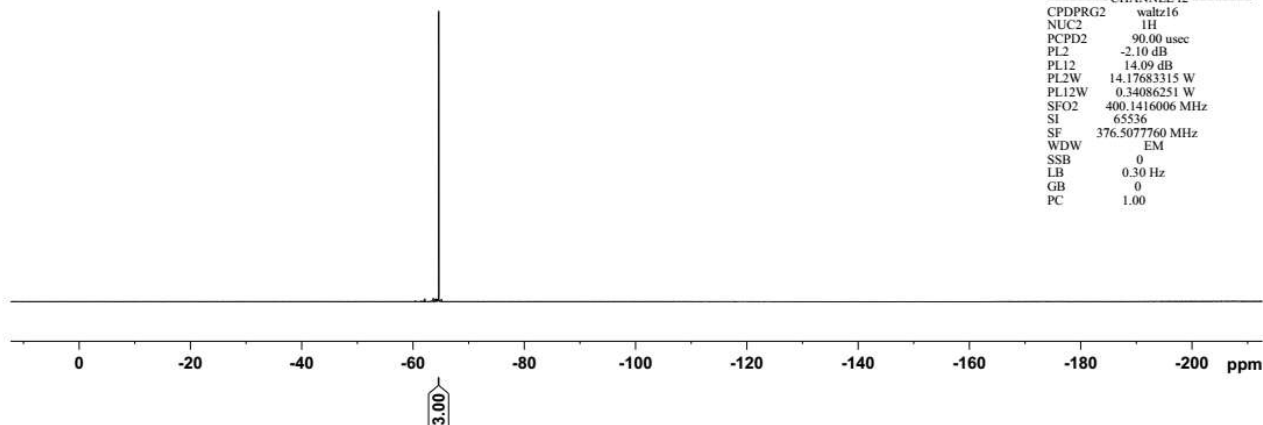

**Monoisotopic Mass, Odd and Even Electron Ions**

13 formula(e) evaluated with 1 results within limits (up to 50 best isotopic matches for each mass)

Elements Used:

C: 0-14 H: 0-14 O: 0-3 F: 0-3

default file

EI-1214-2 1080 (8.319) Cm (1077:1082-(1059:1071+1091:1096))

TOF MS EI+  
8.85e+004

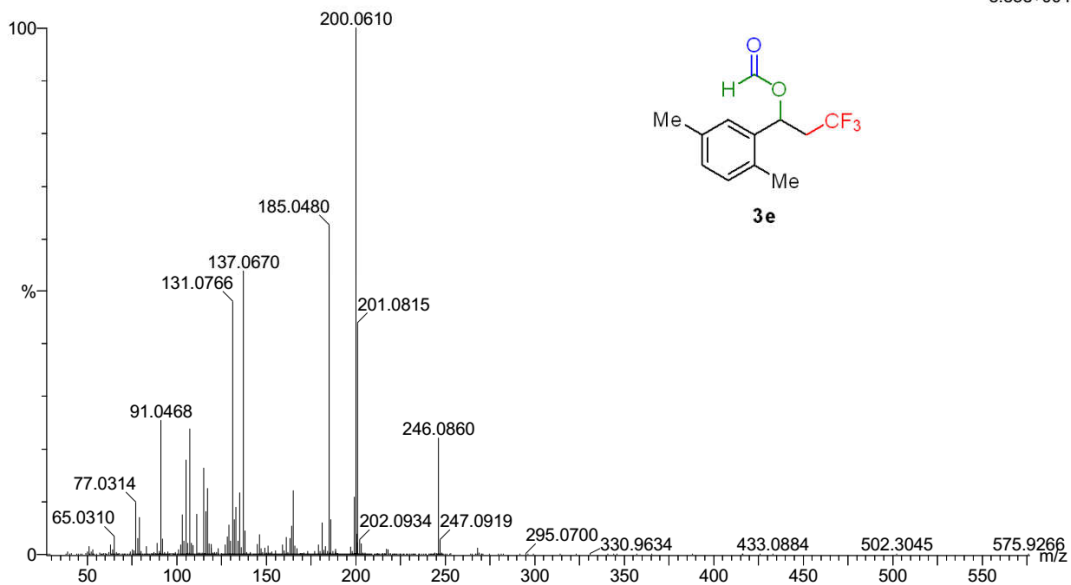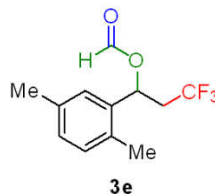

Minimum: -1.5  
 Maximum: 5.0 10.0 50.0

| Mass     | Calc. Mass | mDa  | PPM  | DBE | i-FIT | Formula       |
|----------|------------|------|------|-----|-------|---------------|
| 246.0860 | 246.0868   | -0.8 | -3.3 | 5.0 | 20.0  | C12 H13 O2 F3 |

GCH-II-009-2 CDC13

NAME 170930  
 EXPNO 35  
 PROCNO 1  
 Date\_ 20170930  
 Time\_ 15.02  
 INSTRUM spect  
 PROBHD 5 mm PABBO BB-  
 PULPROG zg30  
 TD 65536  
 SOLVENT CDC13  
 NS 16  
 DS 2  
 SWH 8223.685 Hz  
 FIDRES 0.125483 Hz  
 AQ 3.9846387 sec  
 RG 203  
 DW 60.800 usec  
 DE 6.50 usec  
 TE 1428.3 K  
 D1 1.00000000 sec  
 TD0 1

===== CHANNEL f1 =====  
 NUC1 1H  
 P1 13.96 usec  
 PL1 -2.10 dB  
 PL1W 14.17683315 W  
 SFO1 400.1424710 MHz  
 SI 32768  
 SF 400.1400089 MHz  
 WDW EM  
 SSB 0  
 LB 0.30 Hz  
 GB 0  
 PC 1.00

8.061  
 7.397  
 7.369  
 7.365  
 7.360  
 7.353  
 7.347  
 7.109  
 7.101  
 7.096  
 7.079  
 7.068  
 7.060  
 7.050  
 6.208  
 6.197  
 6.185  
 6.175

2.918  
 2.894  
 2.880  
 2.870  
 2.856  
 2.846  
 2.832  
 2.822  
 2.798  
 2.794  
 2.614  
 2.603  
 2.588  
 2.578  
 2.563  
 2.552  
 2.539  
 2.526  
 2.514  
 2.499  
 2.489  
 1.566

0.000

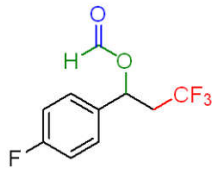

3f  
<sup>1</sup>H NMR (400 MHz, CDCl<sub>3</sub>)

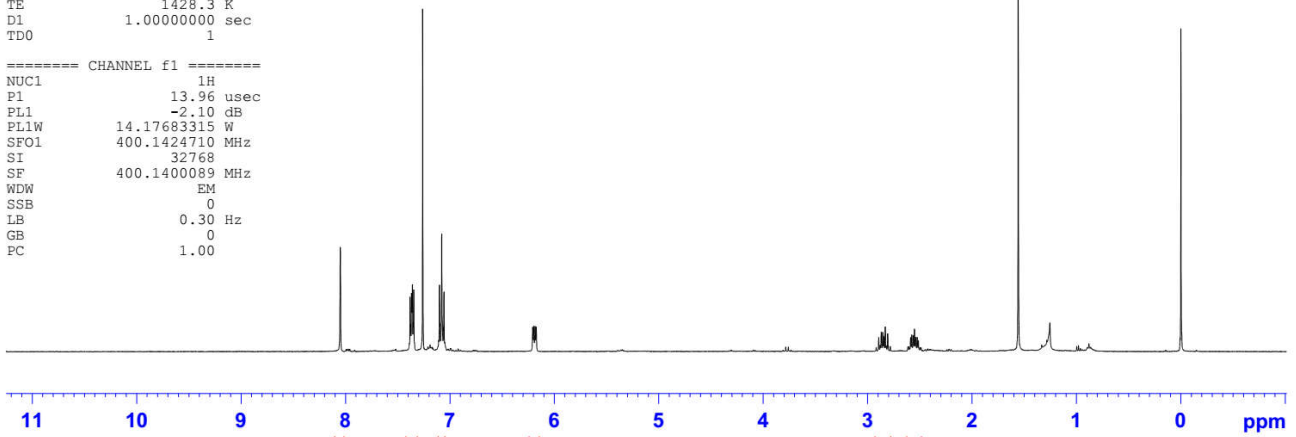

GCH-II-009-2 CDC13

164.06  
 161.59  
 159.28  
 133.82  
 133.70  
 129.70  
 128.09  
 128.40  
 128.32  
 126.33  
 125.58  
 120.82  
 119.52  
 115.70

77.32  
 77.00  
 76.68  
 68.44  
 68.41  
 68.38  
 68.35

40.51  
 40.23  
 39.94  
 39.66

NAME 170928  
 EXPNO 43  
 PROCNO 1  
 Date\_ 20170928  
 Time\_ 21.20  
 INSTRUM spect  
 PROBHD 5 mm PABBO BB-  
 PULPROG zgpg30  
 TD 65536  
 SOLVENT CDC13  
 NS 1024  
 DS 4  
 SWH 24038.461 Hz  
 FIDRES 0.366798 Hz  
 AQ 1.3631988 sec  
 RG 203  
 DW 20.800 usec  
 DE 6.50 usec  
 TE 1950.1 K  
 D1 2.00000000 sec  
 D11 0.03000000 sec  
 TD0 1

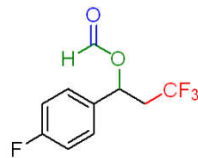

3f  
<sup>13</sup>C NMR (100 MHz, CDCl<sub>3</sub>)

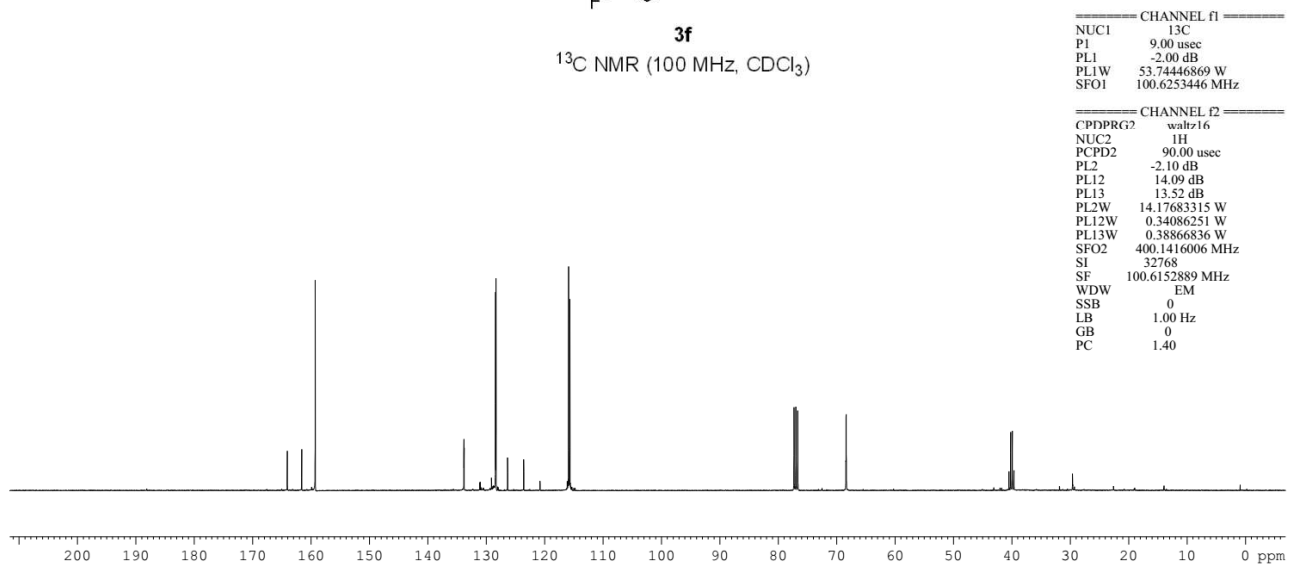

===== CHANNEL f1 =====  
 NUC1 13C  
 P1 9.00 usec  
 PL1 -2.00 dB  
 PL1W 53.74446869 W  
 SFO1 100.6253446 MHz  
 ===== CHANNEL f2 =====  
 C'PDPRG2 waltz16  
 NUC2 1H  
 PCPD2 90.00 usec  
 PL2 -2.10 dB  
 PL12 14.09 dB  
 PL13 13.52 dB  
 PL2W 14.17683315 W  
 PL12W 0.34086251 W  
 PL13W 0.38866836 W  
 SFO2 400.1416006 MHz  
 SI 32768  
 SF 100.6152889 MHz  
 WDW EM  
 SSB 0  
 LB 1.00 Hz  
 GB 0  
 PC 1.40

GCH-II-009-2 CDC13

-64.14  
-112.40

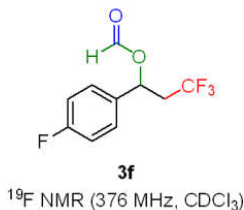

```

NAME      170928
EXPNO     42
PROCNO    1
Date_     20170928
Time      20.20
INSTRUM   spect
PROBHD    5 mm PABBO BB-
PULPROG   zgpg30
TD         131072
SOLVENT   CDCl3
NS         16
DS         4
SWH       89285.711 Hz
FIDRES    0.681196 Hz
AQ         0.7340532 sec
RG         203
DW         5.600 usec
DE         6.50 usec
TE         174.8 K
D1         10.0000000 sec
D11        0.0300000 sec
D12        0.0002000 sec
TD0        1
    
```

```

===== CHANNEL f1 =====
NUC1      19F
P1        14.80 usec
PL1       -3.00 dB
PL1W      19.39594650 W
SFO1      376.4701248 MHz
    
```

```

===== CHANNEL f2 =====
CPDPRG2   waltz16
NUC2      1H
PCPD2     90.00 usec
PL2       -2.10 dB
PL12      14.09 dB
PL2W      14.17683315 W
PL12W     0.34086251 W
SFO2      400.1416006 MHz
SI         65536
SF         376.5077760 MHz
WDW        EM
SSB        0
LB         0.30 Hz
GB         0
PC         1.00
    
```

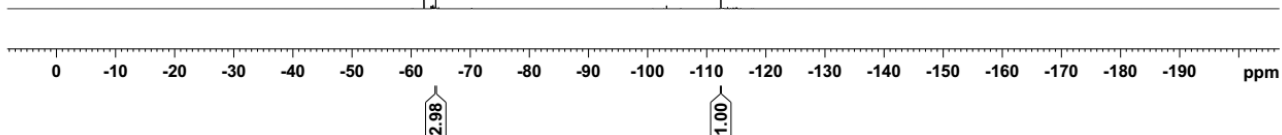

**Monoisotopic Mass, Odd and Even Electron Ions**

43 formula(e) evaluated with 1 results within limits (up to 50 best isotopic matches for each mass)

Elements Used:

C: 0-12 H: 0-12 O: 0-2 F: 0-4 Cl: 0-2

default file

FK-EIH-2 533 (11.942) Cm (532:535-520:529)

TOF MS EI+  
7.79e+002

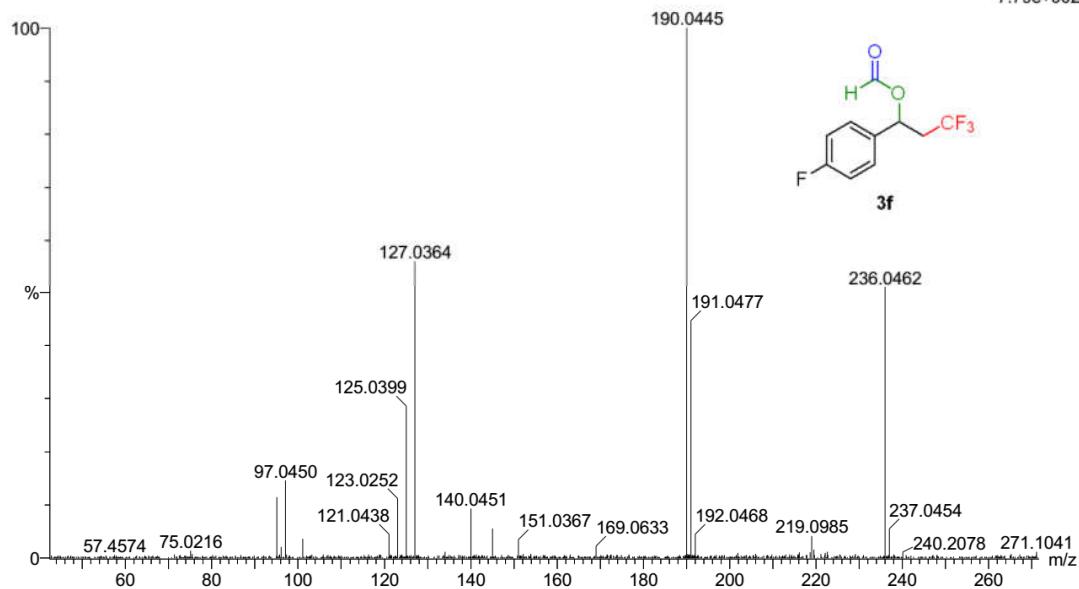

Minimum: -1.5  
Maximum: 50.0

| Mass     | Calc. Mass | mDa | PPM | DBE | i-FIT | Formula      |
|----------|------------|-----|-----|-----|-------|--------------|
| 236.0462 | 236.0460   | 0.2 | 0.8 | 5.0 | 0.2   | C10 H8 O2 F4 |



GCH-II-012-2 DMSO

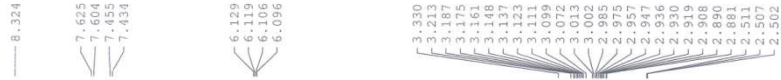

NAME 170929  
 EXPNO 24  
 PROCNO 1  
 Date\_ 20170929  
 Time 13.05  
 INSTRUM spect  
 PROBHD 5 mm PABBO BB-  
 PULPROG zg30  
 TD 65536  
 SOLVENT DMSO  
 NS 16  
 DS 2  
 SWH 8223.685  
 FIDRES 0.125483  
 AQ 3.9846387  
 RG 203  
 DW 60.800  
 DE 6.50  
 TE 1382.7  
 D1 1.00000000  
 TD0 1

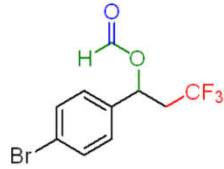

**3g**  
<sup>1</sup>H NMR (400 MHz, DMSO-d<sub>6</sub>)

===== CHANNEL f1 =====  
 NUC1 1H  
 P1 13.96  
 PL1 -2.10  
 PL1W 14.17683315  
 SFO1 400.1424710  
 SI 32768  
 SF 400.1400011  
 WDW EM  
 SSB 0  
 LB 0.30  
 GB 0  
 PC 1.00

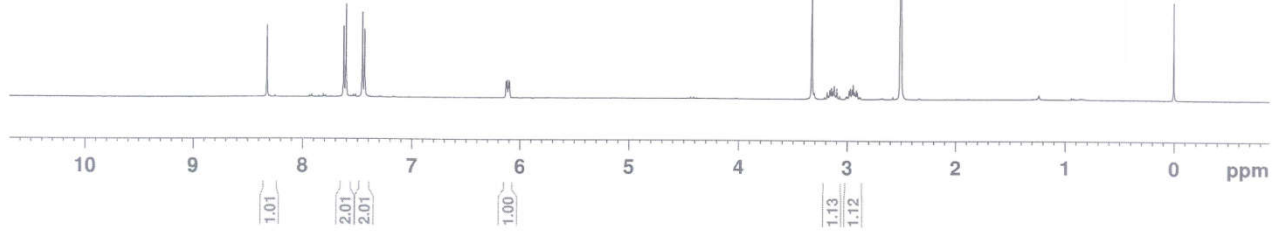

GCH-II-012-2 CDCl<sub>3</sub>

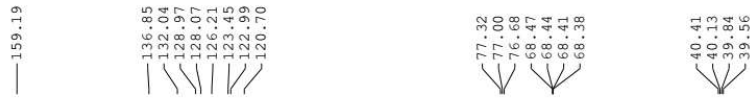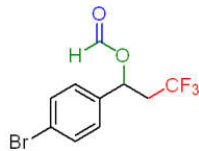

**3g**  
<sup>13</sup>C NMR (100 MHz, CDCl<sub>3</sub>)

NAME 170929  
 EXPNO 21  
 PROCNO 1  
 Date\_ 20170929  
 Time 12.36  
 INSTRUM spect  
 PROBHD 5 mm PABBO BB-  
 PULPROG zgpg30  
 TD 65536  
 SOLVENT CDCl<sub>3</sub>  
 NS 310  
 DS 4  
 SWH 24038.461 Hz  
 FIDRES 0.366798 Hz  
 AQ 1.3631988 sec  
 RG 203  
 DW 20.800 usec  
 DE 6.50 usec  
 TE 1384.8 K  
 D1 2.00000000 sec  
 D11 0.03000000 sec  
 TD0 1

===== CHANNEL f1 =====  
 NUC1 13C  
 P1 9.00 usec  
 PL1 -2.00 dB  
 PL1W 53.74446869 W  
 SFO1 100.6253446 MHz

===== CHANNEL f2 =====  
 CPDPRG2 waltz16  
 NUC2 1H  
 PCPD2 90.00 usec  
 PL2 -2.10 dB  
 PL12 14.09 dB  
 PL13 13.52 dB  
 PL2W 14.17683315 W  
 PL12W 0.34086251 W  
 PL13W 0.38866836 W  
 SFO2 400.1416006 MHz  
 SI 32768  
 SF 100.6152926 MHz  
 WDW EM  
 SSB 0  
 LB 1.00 Hz  
 GB 0  
 PC 1.40

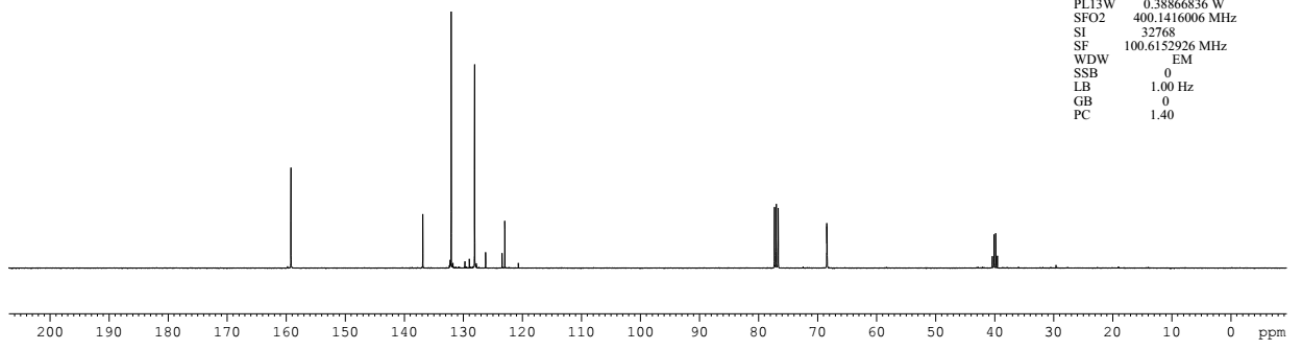

GCH-II-012-2 CDCl3

-64.01

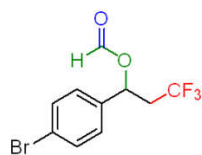

**3g**  
<sup>19</sup>F NMR (376 MHz, CDCl<sub>3</sub>)

NAME 170929  
 EXPNO 19  
 PROCNO 1  
 Date\_ 20170929  
 Time 11.14  
 INSTRUM spect  
 PROBHD 5 mm PABBO BB-  
 PULPROG zgpg30  
 TD 131072  
 SOLVENT CDCl3  
 NS 16  
 DS 4  
 SWH 89285.711 Hz  
 FIDRES 0.681196 Hz  
 AQ 0.7340532 sec  
 RG 203  
 DW 5.600 usec  
 DE 6.50 usec  
 TE 1604.0 K  
 D1 1.00000000 sec  
 D11 0.03000000 sec  
 D12 0.00002000 sec  
 TD0 1

==== CHANNEL f1 =====  
 NUC1 19F  
 P1 14.80 usec  
 PL1 -3.00 dB  
 PL1W 19.39594650 W  
 SFO1 376.4701248 MHz

==== CHANNEL f2 =====  
 CPDPRG2 waltz16  
 NUC2 1H  
 PCPD2 90.00 usec  
 PL2 -2.10 dB  
 PL12 14.09 dB  
 PL2W 14.17683315 W  
 PL12W 0.34086251 W  
 SFO2 400.1416006 MHz  
 SI 65536  
 SF 376.5077760 MHz  
 WDW EM  
 SSB 0  
 LB 0.30 Hz  
 GB 0  
 PC 1.00

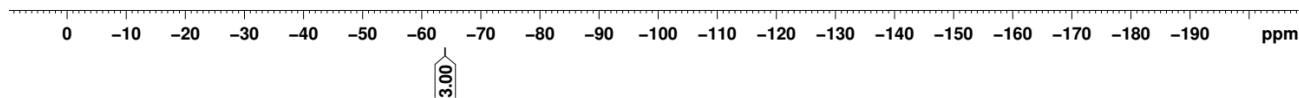

Monoisotopic Mass, Odd and Even Electron Ions  
 28 formula(e) evaluated with 1 results within limits (up to 50 best isotopic matches for each mass)  
 Elements Used:  
 C: 0-12 H: 0-12 O: 0-2 F: 0-4 Br: 0-1

default file  
 FK-EIH 339 (8.709) Cm (339:340-(329:333+349:354))

TOF MS EI+  
 3.98e+002

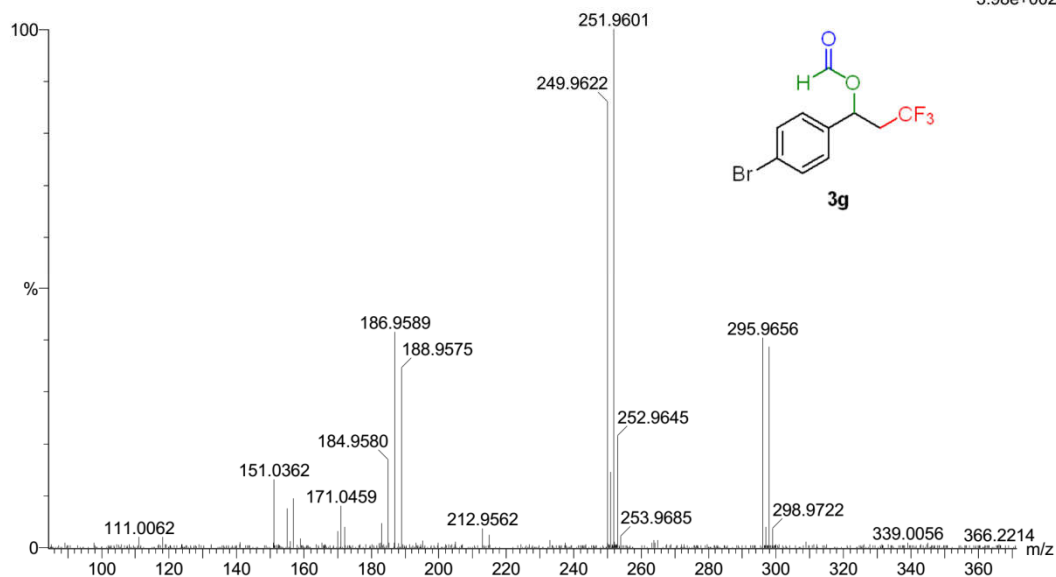

Minimum: -1.5  
 Maximum: 50.0

| Mass     | Calc. Mass | mDa  | PPM  | DBE | i-FIT | Formula         |
|----------|------------|------|------|-----|-------|-----------------|
| 295.9656 | 295.9660   | -0.4 | -1.4 | 5.0 | 0.2   | C10 H8 O2 F3 Br |

GCH-II-011-2 CDCl3

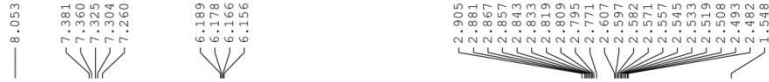

NAME 170929  
 EXPNO 4  
 PROCNO 1  
 Date\_ 20170929  
 Time 9.14  
 INSTRUM spect  
 PROBHD 5 mm PABBO BB-  
 PULPROG zg30  
 TD 65536  
 SOLVENT CDCl3  
 NS 16  
 DS 2  
 SWH 8223.685 Hz  
 FIDRES 0.125483 Hz  
 AQ 3.9846387 sec  
 RG 203  
 DW 60.800 usec  
 DE 6.50 usec  
 TE 1812.5 K  
 D1 1.00000000 sec  
 TD0 1

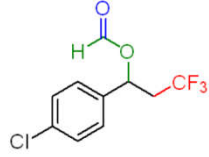

<sup>1</sup>H NMR (400 MHz, CDCl<sub>3</sub>)

===== CHANNEL f1 =====  
 NUC1 1H  
 P1 13.96 usec  
 PL1 -2.10 dB  
 PL1W 14.17683315 W  
 SFO1 400.1424710 MHz  
 SI 32768  
 SF 400.1400097 MHz  
 WDW EM  
 SSB 0  
 LB 0.30 Hz  
 GB 0  
 PC 1.00

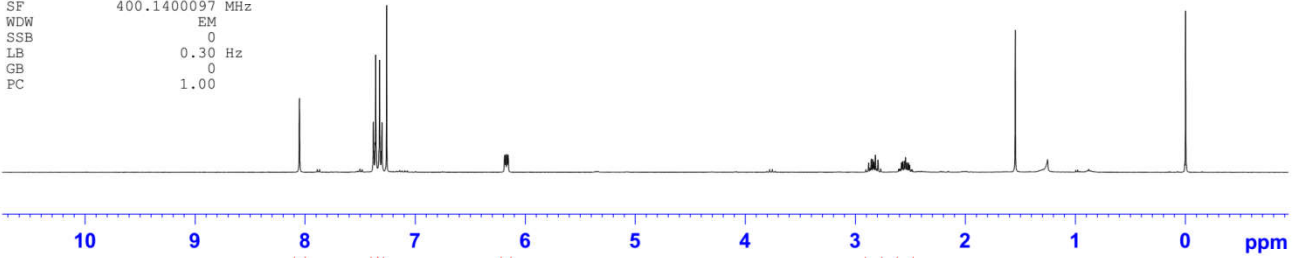

GCH-II-011-2 CDCl3

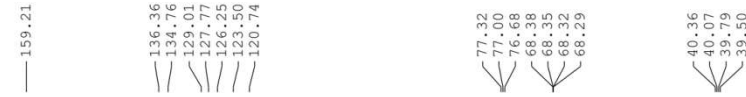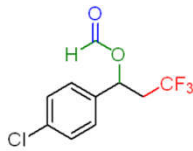

<sup>13</sup>C NMR (100 MHz, CDCl<sub>3</sub>)

NAME 170930  
 EXPNO 36  
 PROCNO 1  
 Date\_ 20170930  
 Time 15.46  
 INSTRUM spect  
 PROBHD 5 mm PABBO BB-  
 PULPROG zgpg30  
 TD 65536  
 SOLVENT CDCl3  
 NS 300  
 DS 4  
 SWH 24038.461 Hz  
 FIDRES 0.366798 Hz  
 AQ 1.3631988 sec  
 RG 203  
 DW 20.800 usec  
 DE 6.50 usec  
 TE 1382.1 K  
 D1 2.00000000 sec  
 D11 0.03000000 sec  
 TD0 1

===== CHANNEL f1 =====  
 NUC1 13C  
 P1 9.00 usec  
 PL1 -2.00 dB  
 PL1W 53.74446869 W  
 SFO1 100.6253446 MHz

===== CHANNEL f2 =====  
 CPDPRG2 waltz16  
 NUC2 1H  
 PCPD2 90.00 usec  
 PL2 -2.10 dB  
 PL12 14.09 dB  
 PL13 13.52 dB  
 PL2W 14.17683315 W  
 PL12W 0.34086251 W  
 PL13W 0.38866836 W  
 SFO2 400.1416006 MHz  
 SI 32768  
 SF 100.6152951 MHz  
 WDW EM  
 SSB 0  
 LB 1.00 Hz  
 GB 0  
 PC 1.40

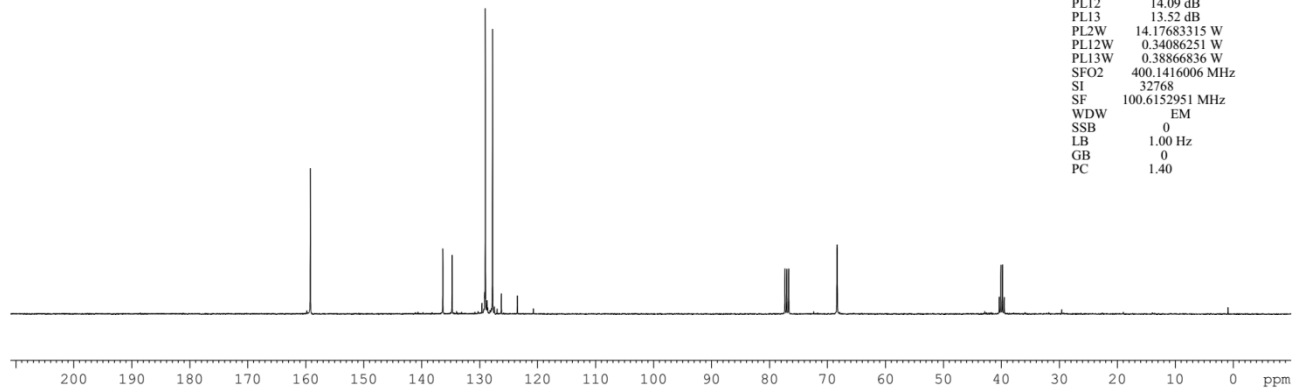

-64.02

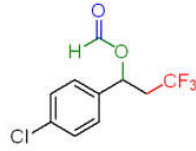

**3h**  
<sup>19</sup>F NMR (376 MHz, CDCl<sub>3</sub>)

```

NAME      170929
EXPNO     5
PROCNO    1
Date_     20170929
Time      9.16
INSTRUM   spect
PROBHD    5 mm PABBO BB-
PULPROG   zgpg30
TD         131072
SOLVENT   CDCl3
NS         16
DS         4
SWH       89285.711 Hz
FIDRES    0.681196 Hz
AQ        0.7340532 sec
RG         203
DW         5.600 usec
DE         6.50 usec
TE         1822.2 K
D1         1.00000000 sec
D11        0.03000000 sec
D12        0.00002000 sec
TD0        1
    
```

```

===== CHANNEL f1 =====
NUC1      19F
P1        14.80 usec
PL1       -3.00 dB
PL1W      19.39594650 W
SFO1      376.4701248 MHz

===== CHANNEL f2 =====
CPDPRG2   waltz16
NUC2      1H
PCPD2     90.00 usec
PL2       -2.10 dB
PL12      14.09 dB
PL12W     14.17683315 W
PL12W     0.34086251 W
SFO2      400.1416006 MHz
SI         65536
SF         376.5077760 MHz
WDW        EM
SSB        0
LB         0.30 Hz
GB         0
PC         1.00
    
```

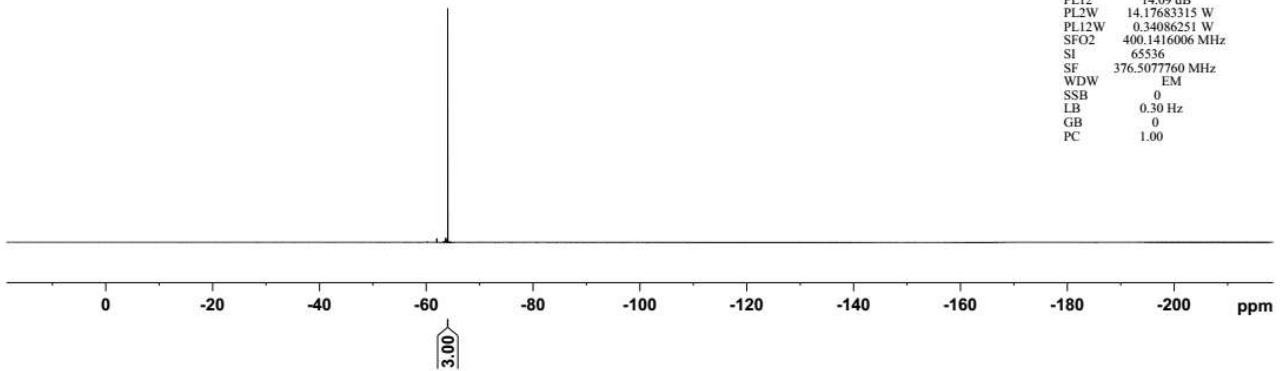

**Monoisotopic Mass, Odd and Even Electron Ions**

41 formula(e) evaluated with 1 results within limits (up to 50 best isotopic matches for each mass)

Elements Used:

C: 0-12 H: 0-12 O: 0-2 F: 0-4 Cl: 0-2

default file

FK-EIH 299 (8.042) Cm (297:301-(283:290+314:322))

TOF MS EI+  
 4.26e+003

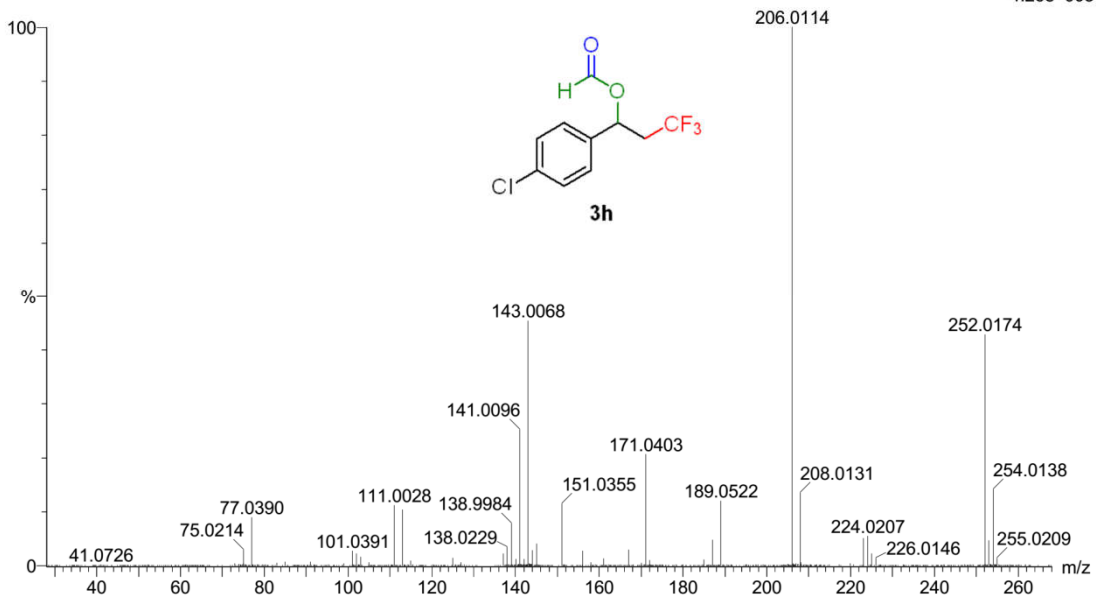

Minimum: -1.5  
 Maximum: 50.0

| Mass     | Calc. Mass | mDa | PPM | DBE | i-FIT | Formula         |
|----------|------------|-----|-----|-----|-------|-----------------|
| 252.0174 | 252.0165   | 0.9 | 3.6 | 5.0 | 0.3   | C10 H8 O2 F3 Cl |



-64.07

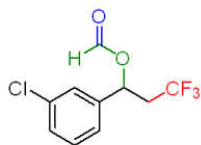

**3i**

<sup>19</sup>F NMR (376 MHz, CDCl<sub>3</sub>)

```

NAME      180425
EXPNO     24
PROCNO    1
Date_     20180425
Time      16.34
INSTRUM   spect
PROBHD    5 mm PABBO BB-
PULPROG   zgpg30
TD         131072
SOLVENT   CDCl3
NS         16
DS         4
SWH        89285.711 Hz
FIDRES     0.681196 Hz
AQ         0.7340532 sec
RG         203
DW         5.600 usec
DE         6.50 usec
TE         -1409.3 K
D1         1.00000000 sec
D11        0.03000000 sec
D12        0.00002000 sec
TD0        1
    
```

```

===== CHANNEL f1 =====
NUC1       19F
PL1        14.80 usec
PL1        -3.00 dB
PL1W       19.39594650 W
SFO1       376.4701248 MHz
    
```

```

===== CHANNEL f2 =====
CPDPRG2    waltz16
NUC2        1H
PCPD2       90.00 usec
PL2         -2.10 dB
PL12        13.60 dB
PL2W        14.17683315 W
PL12W       0.38157439 W
SFO2        400.1416006 MHz
SI          65336
SF          376.5077760 MHz
WDW         EM
SSB         0
LB          0.30 Hz
GB          0
PC          1.00
    
```

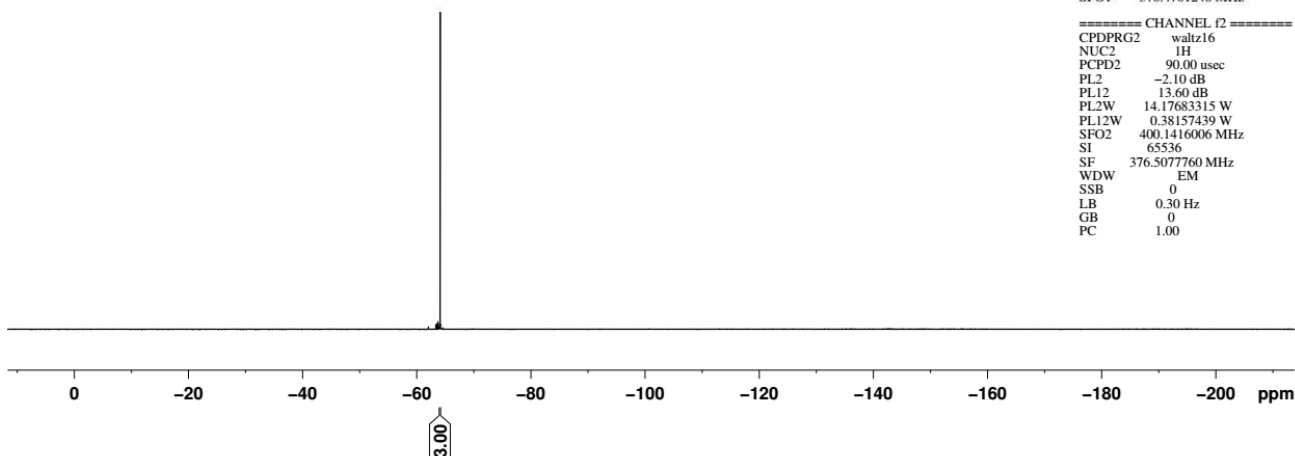

Monoisotopic Mass, Odd and Even Electron Ions  
 179 formula(e) evaluated with 1 results within limits (up to 50 best isotopic matches for each mass)  
 Elements Used:

C: 10-18 H: 0-60 O: 0-5 F: 0-3 Cl: 0-3

default file  
 GCH-H-180504 803 (7.342) Cm (803-797:800)

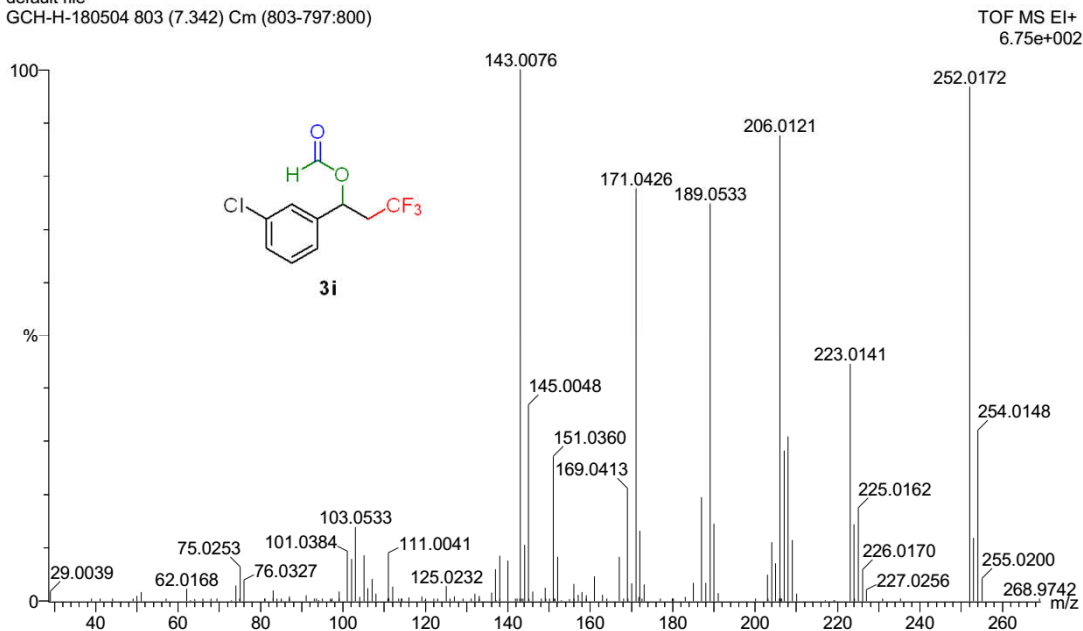

Minimum: -1.5  
 Maximum: 5.0 5.0 50.0

| Mass     | Calc. Mass | mDa | PPM | DBE | i-FIT | Formula         |
|----------|------------|-----|-----|-----|-------|-----------------|
| 252.0172 | 252.0165   | 0.7 | 2.8 | 5.0 | 0.2   | C10 H8 O2 F3 Cl |

HZ-GCH-I-028-4

CDCl<sub>3</sub>

8.116  
7.447  
7.428  
7.423  
7.413  
7.407  
7.403  
7.394  
7.388  
7.335  
7.330  
7.316  
7.311  
7.308  
7.300  
7.293  
7.289  
7.284  
7.271  
7.260  
6.604  
6.587  
6.574

2.776  
2.763  
2.752  
2.738  
2.728  
2.713  
2.704  
2.697  
2.692  
2.685  
2.665  
2.646  
2.638  
2.625  
2.612  
2.608  
2.599  
1.554

NAME 171206  
EXPNO 49  
PROCNO 1  
Date 20171206  
Time 16.06

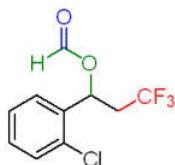

3j

<sup>1</sup>H NMR (400 MHz, DMSO-d<sub>6</sub>)

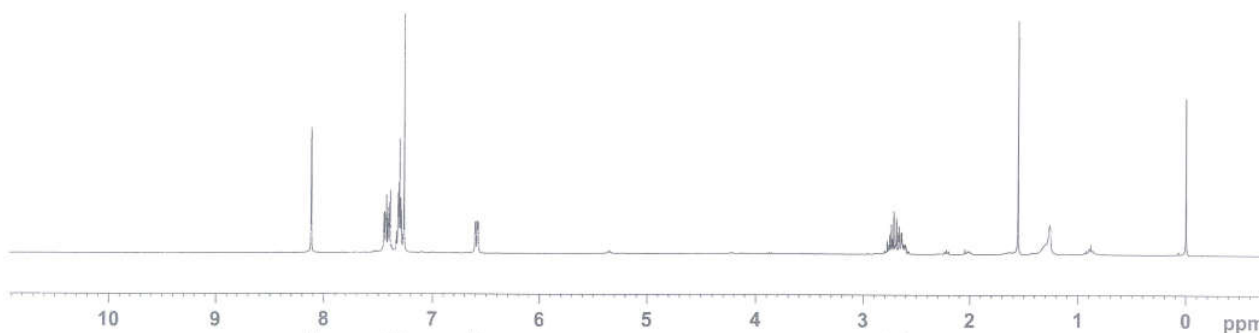

HZ-GCH-I-028-4 CDCl<sub>3</sub>

158.98  
135.68  
131.61  
129.85  
129.82  
129.12  
127.40  
126.80  
126.35  
123.60  
120.83

77.32  
77.00  
76.68  
66.07  
66.04  
66.00  
65.97

39.38  
39.09  
38.81  
38.52

NAME 171206  
EXPNO 55  
PROCNO 1  
Date 20171206  
Time 16.31  
INSTRUM spect  
PROBHD 5 mm PABBO BB-  
PULPROG zgpg30  
TD 65536  
SOLVENT CDCl<sub>3</sub>  
NS 227  
DS 4  
SWH 24038.461 Hz  
FIDRES 0.366798 Hz  
AQ 1.3631988 sec  
RG 203  
DW 20.800 usec  
DE 6.50 usec  
TE 297.6 K  
D1 2.0000000 sec  
D11 0.03000000 sec  
TD0 1

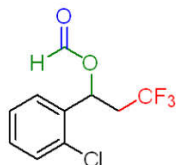

3j

<sup>13</sup>C NMR (100 MHz, CDCl<sub>3</sub>)

CHANNEL f1  
NUC1 13C  
P1 9.00 usec  
PL1 -2.00 dB  
PL1W 53.74446869 W  
SFO1 100.6253446 MHz

CHANNEL f2  
CPDPRG2 waltz16  
NUC2 1H  
PCPD2 90.00 usec  
PL2 -2.10 dB  
PL12 14.09 dB  
PL13 13.52 dB  
PL2W 14.17683315 W  
PL12W 0.34086251 W  
PL13W 0.38866836 W  
SFO2 400.1416006 MHz  
SI 32768  
SF 100.6152948 MHz  
WDB EM  
SSB 0  
LB 1.00 Hz  
GB 0  
PC 1.40

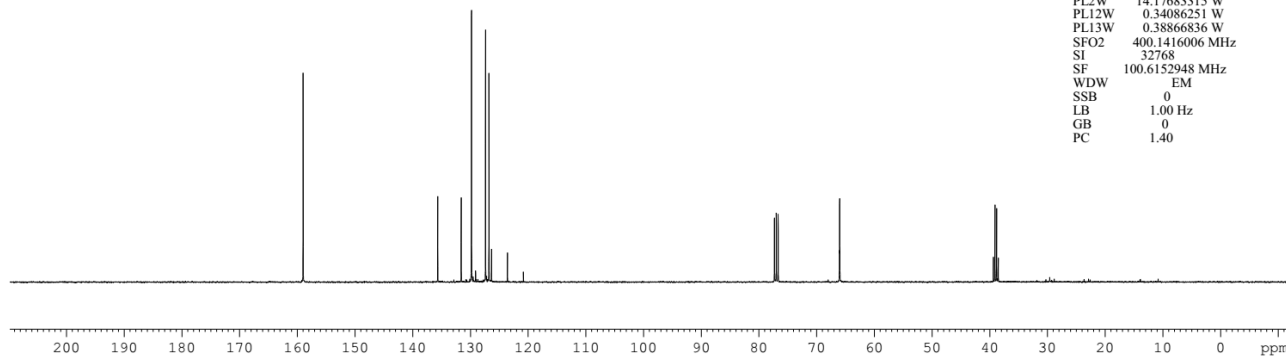

HZ-GCH-I-028-4 CDC13

-64.23

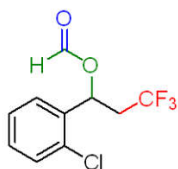

**3j**

<sup>19</sup>F NMR (376 MHz, CDCl<sub>3</sub>)

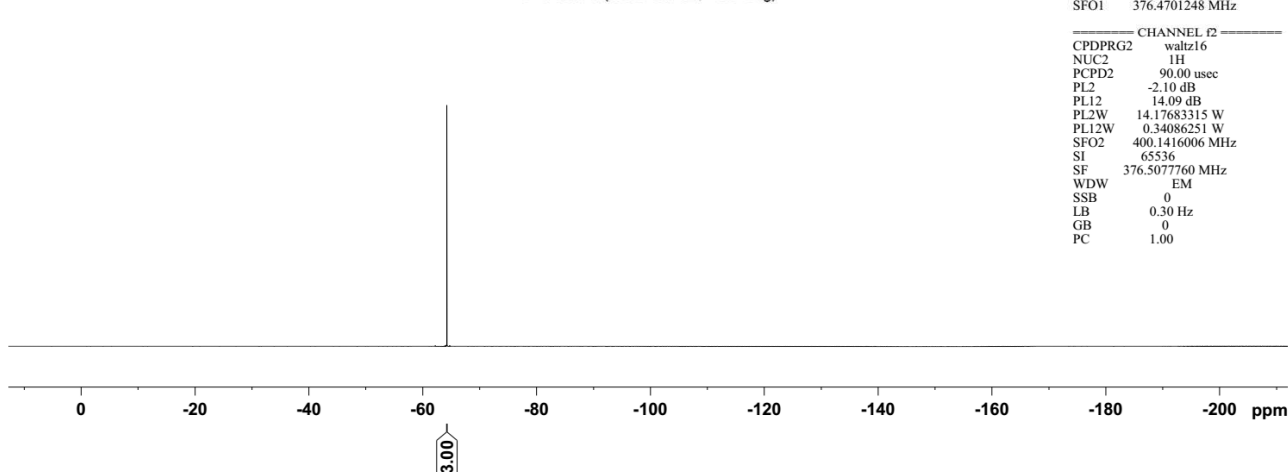

```

NAME      171206
EXPNO     50
PROCNO    1
Date_     20171206
Time      16.07
INSTRUM   spect
PROBHD    5 mm PABBO BB-
PULPROG   zgpg30
TD         131072
SOLVENT   CDCl3
NS         16
DS         4
SWH        89285.711 Hz
FIDRES     0.681196 Hz
AQ         0.7340532 sec
RG         203
DW         5.600 usec
DE         6.50 usec
TE         296.9 K
D1         1.00000000 sec
D11        0.03000000 sec
D12        0.00002000 sec
TD0        1
    
```

```

===== CHANNEL f1 =====
NUC1       19F
P1         14.80 usec
PL1        -3.00 dB
PL1W       19.39594650 W
SFO1       376.4701248 MHz
    
```

```

===== CHANNEL f2 =====
CPDPRG2    waltz16
NUC2        1H
PCPD2       90.00 usec
PL2         -2.10 dB
PL12        14.09 dB
PL2W        14.1768315 W
PL12W       0.34086251 W
SFO2        400.1416006 MHz
SI          65536
SF          376.5077760 MHz
EMW         EM
WDW         EM
SSB         0
LB          0.30 Hz
GB          0
PC          1.00
    
```

Monoisotopic Mass, Odd and Even Electron Ions

42 formula(e) evaluated with 1 results within limits (up to 50 best isotopic matches for each mass)

Elements Used:

C: 0-14 H: 0-12 O: 0-3 Cl: 0-2 F: 0-3

default file

EI-1214 1077 (8.303) Cm (1077:1081-(1085:1088+1065:1070))

TOF MS EI+  
2.74e+003

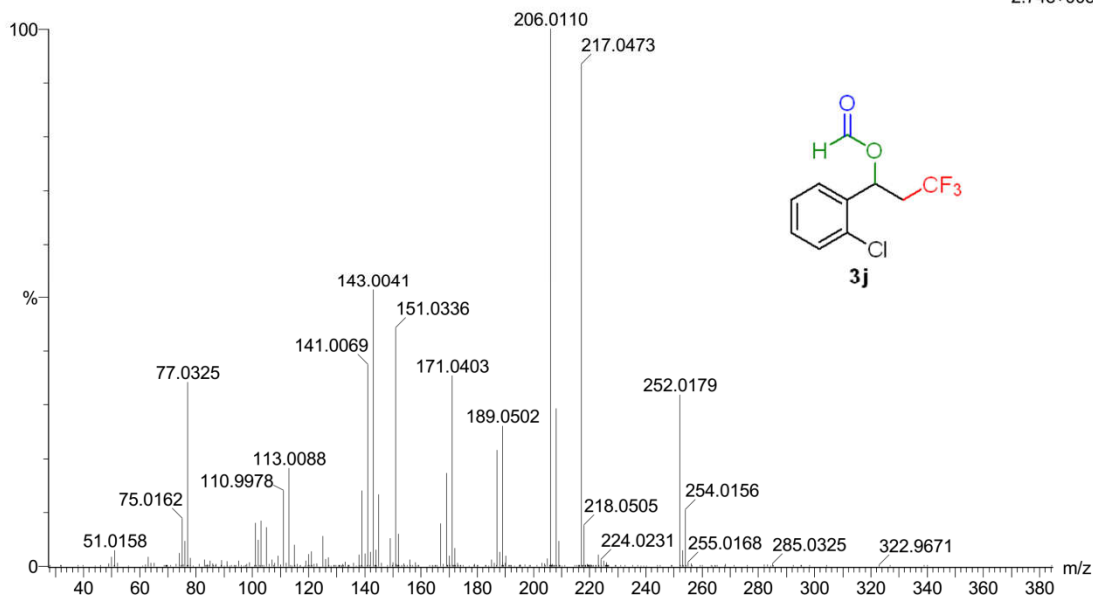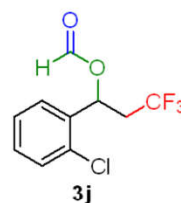

**3j**

Minimum: -1.5  
Maximum: 50.0

| Mass     | Calc. Mass | mDa | PPM | DBE | i-FIT | Formula         |
|----------|------------|-----|-----|-----|-------|-----------------|
| 252.0179 | 252.0165   | 1.4 | 5.6 | 5.0 | 2.5   | C10 H8 O2 Cl F3 |



GCH-I-060-2 CDCl<sub>3</sub>

8.075  
7.711  
7.690  
7.487  
7.260

6.227  
6.216  
6.205  
6.194

2.910  
2.886  
2.872  
2.862  
2.848  
2.834  
2.824  
2.816  
2.801  
2.777  
2.633  
2.622  
2.607  
2.596  
2.583  
2.574  
2.566  
2.556  
2.533  
2.519  
2.508  
1.573

|         |                   |
|---------|-------------------|
| NAME    | 180528            |
| EXPNO   | 5                 |
| PROCNO  | 1                 |
| Date_   | 20180528          |
| Time    | 14.51             |
| INSTRUM | spect             |
| PROBHD  | 5 mm PABBO BB-    |
| PULPROG | zg30              |
| TD      | 65536             |
| SOLVENT | CDCl <sub>3</sub> |
| NS      | 16                |
| DS      | 2                 |
| SWH     | 8223.695 Hz       |
| FIDRES  | 0.125483 Hz       |
| AQ      | 3.9846387 sec     |
| RG      | 203               |
| DW      | 60.800 usec       |
| DE      | 6.50 usec         |
| TE      | 297.4 K           |
| D1      | 1.00000000 sec    |
| TD0     | 1                 |

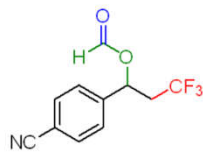

**3k**  
<sup>1</sup>H NMR (400 MHz, CDCl<sub>3</sub>)

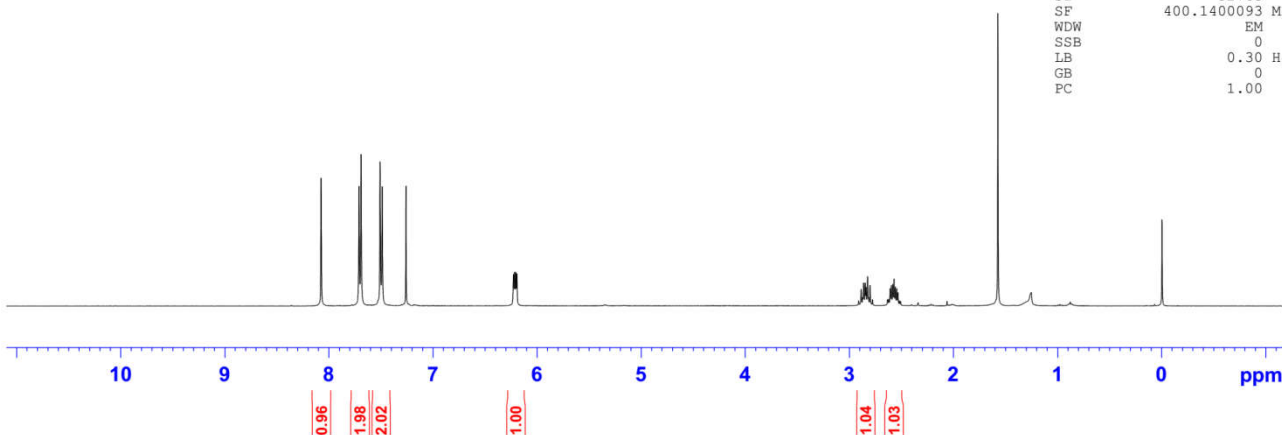

GCH-I-060-2 CDCl<sub>3</sub>

159.03  
142.66

132.63  
128.77  
127.02  
126.02  
123.26  
120.50  
118.00  
112.81

77.32  
77.00  
76.68  
68.26  
68.23  
68.20  
68.17

40.23  
39.95  
39.66  
39.37

|         |                   |
|---------|-------------------|
| NAME    | 180528            |
| EXPNO   | 6                 |
| PROCNO  | 1                 |
| Date_   | 20180528          |
| Time    | 15.18             |
| INSTRUM | spect             |
| PROBHD  | 5 mm PABBO BB-    |
| PULPROG | zgpg30            |
| TD      | 65536             |
| SOLVENT | CDCl <sub>3</sub> |
| NS      | 269               |
| DS      | 4                 |
| SWH     | 24038.461 Hz      |
| FIDRES  | 0.366798 Hz       |
| AQ      | 1.3631988 sec     |
| RG      | 203               |
| DW      | 20.800 usec       |
| DE      | 6.50 usec         |
| TE      | 298.3 K           |
| D1      | 2.00000000 sec    |
| D11     | 0.03000000 sec    |
| TD0     | 1                 |

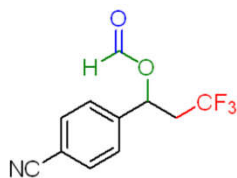

**3k**  
<sup>13</sup>C NMR (100 MHz, CDCl<sub>3</sub>)

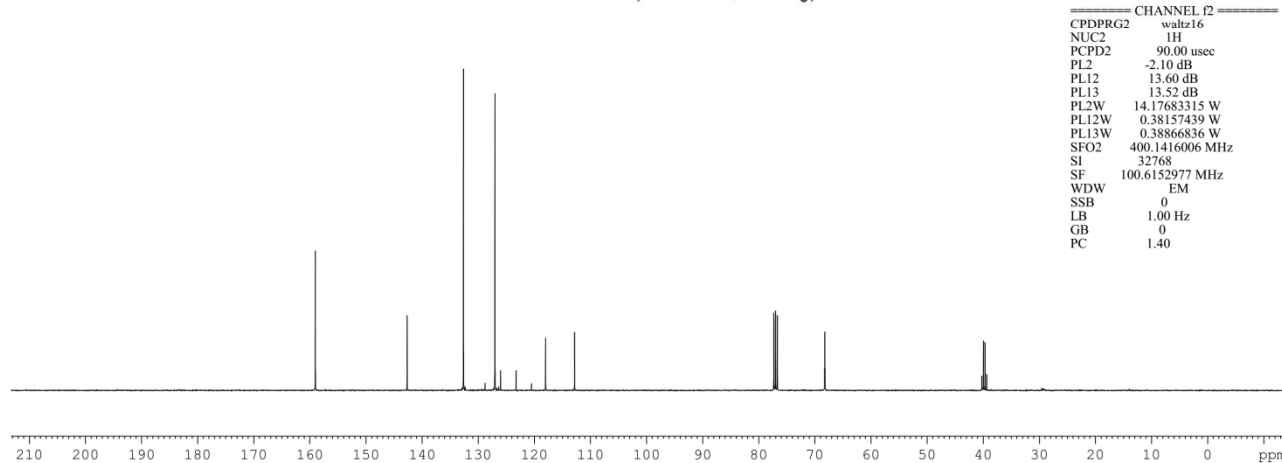

|                        |                 |
|------------------------|-----------------|
| ===== CHANNEL f1 ===== |                 |
| NUC1                   | 13C             |
| P1                     | 9.00 usec       |
| PL1                    | -2.10 dB        |
| PL1W                   | 53.74446869 W   |
| SFO1                   | 100.6253446 MHz |
| ===== CHANNEL f2 ===== |                 |
| CPDPRG2                | waltz16         |
| NUC2                   | 1H              |
| PCPD2                  | 90.00 usec      |
| PL2                    | -2.10 dB        |
| PL12                   | 13.60 dB        |
| PL13                   | 13.52 dB        |
| PL2W                   | 14.17683315 W   |
| PL12W                  | 0.38157439 W    |
| PL13W                  | 0.38866836 W    |
| SFO2                   | 400.1416006 MHz |
| S1                     | 32768           |
| SF                     | 100.6152977 MHz |
| WDW                    | EM              |
| SSB                    | 0               |
| LB                     | 1.00 Hz         |
| GB                     | 0               |
| PC                     | 1.40            |

GCH-I-060-2 CDCL3

-63.86

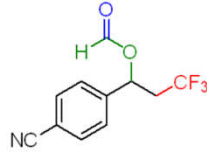

**3k**

<sup>19</sup>F NMR (376 MHz, CDCl<sub>3</sub>)

```

NAME      180528
EXPNO     4
PROCNO    1
Date_     20180528
Time      14.49
INSTRUM   spect
PROBHD    5 mm PABBO BB-
PULPROG   zgfhigqn
TD         131072
SOLVENT   CDCl3
NS         16
DS         4
SWH        89285.711 Hz
FIDRES     0.681196 Hz
AQ         0.7340532 sec
RG         203
DW         5.600 usec
DE         6.50 usec
TE         297.5 K
D1         1.00000000 sec
D11        0.03000000 sec
D12        0.00002000 sec
TD0        1
    
```

```

===== CHANNEL f1 =====
NUC1      19F
P1        14.80 usec
PL1       -3.00 dB
PL1W      19.39594650 W
SFO1      376.4701248 MHz

===== CHANNEL f2 =====
CPDPRG2   waltz16
NUC2      1H
PCPD2     90.00 usec
PL2       -2.10 dB
PL12      13.60 dB
PL2W      14.17683315 W
PL12W     0.38157439 W
SFO2      400.1416006 MHz
SI         65536
SF        376.5077760 MHz
WDW        EM
SSB        0
LB         0.30 Hz
GB         0
PC         1.00
    
```

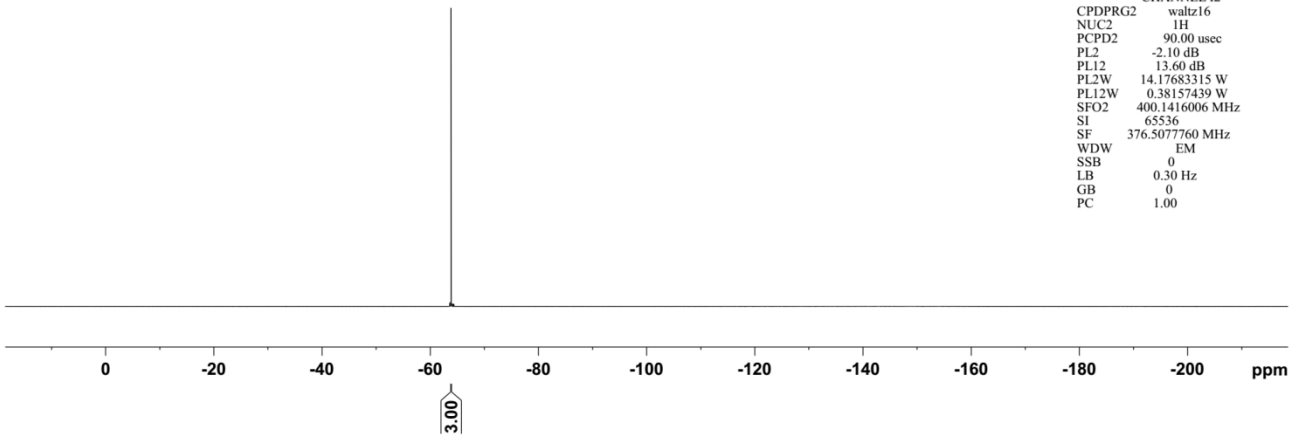

Monoisotopic Mass, Odd and Even Electron Ions  
 209 formula(e) evaluated with 1 results within limits (up to 50 best isotopic matches for each mass)  
 Elements Used:  
 C: 9-30 H: 0-60 N: 0-2 O: 0-4 F: 1-8  
 default file  
 GCH-0529 993 (8.356) Cm (993:995-1003:1011)

TOF MS EI+  
 5.18e+003

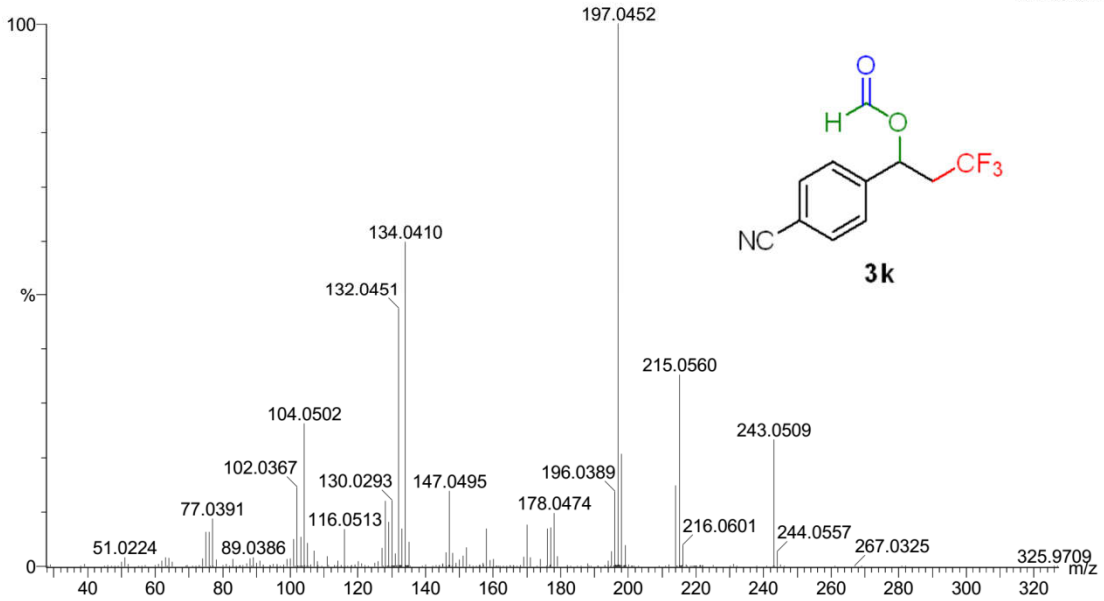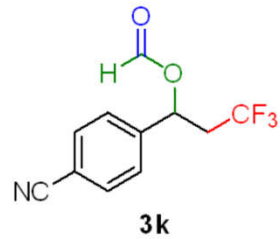

**3k**

| Mass     | Calc. Mass | mDa | PPM | DBE | i-FIT | Formula        |
|----------|------------|-----|-----|-----|-------|----------------|
| 243.0509 | 243.0507   | 0.2 | 0.8 | 7.0 | 3.3   | C11 H8 N O2 F3 |

GCH-057-2 CDC13

NAME 180507  
 EXPNO 10  
 PROCNO 1  
 Date\_ 20180507  
 Time\_ 15.47  
 INSTRUM spect  
 PROBHD 5 mm PABBO BB-  
 PULPROG zg30  
 TD 65536  
 SOLVENT CDC13  
 NS 16  
 DS 2  
 SWH 8223.685 Hz  
 FIDRES 0.125483 Hz  
 AQ 3.9846387 sec  
 RG 203  
 DW 60.800 usec  
 DE 6.50 usec  
 TE -731.0 K  
 D1 1.0000000 sec  
 TDO 1

8.078  
 7.673  
 7.653  
 7.514  
 7.495  
 7.260

6.258  
 6.249  
 6.236  
 6.227

2.923  
 2.913  
 2.879  
 2.865  
 2.856  
 2.841  
 2.817  
 2.793  
 2.636  
 2.627  
 2.611  
 2.601  
 2.586  
 2.575  
 2.563  
 2.549  
 2.538  
 2.523  
 2.512  
 1.558

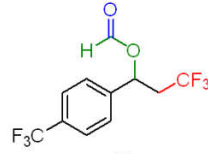

**31**  
<sup>1</sup>H NMR (400 MHz, CDCl<sub>3</sub>)

===== CHANNEL f1 =====  
 NUC1 1H  
 P1 14.77 usec  
 PL1 -2.10 dB  
 PL1W 14.17683315 W  
 SFO1 400.1424710 MHz  
 SI 32768  
 SF 400.1400094 MHz  
 WDW EM  
 SSB 0  
 LB 0.30 Hz  
 GB 0  
 PC 1.00

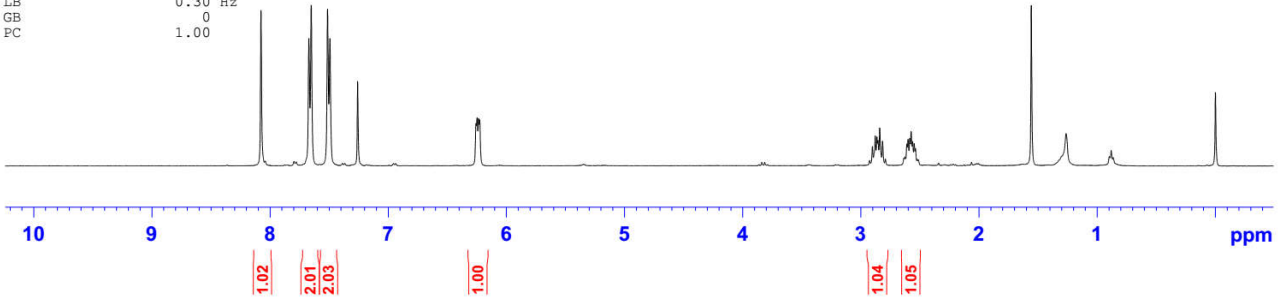

HZ-ETA-XIII-057-2 CDC13

159.17  
 141.76  
 131.72  
 131.39  
 131.07  
 130.74  
 128.99  
 127.82  
 126.78  
 126.23  
 126.03  
 125.99  
 125.95  
 125.91  
 125.12  
 123.47  
 122.41  
 120.72  
 119.71

77.32  
 77.00  
 76.68  
 68.53  
 68.50  
 68.47  
 68.43  
 40.59  
 40.30  
 40.02  
 39.73

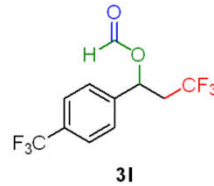

**31**  
<sup>13</sup>C NMR (100 MHz, CDCl<sub>3</sub>)

NAME 180507  
 EXPNO 11  
 PROCNO 1  
 Date\_ 20180507  
 Time\_ 16.32  
 INSTRUM spect  
 PROBHD 5 mm PABBO BB-  
 PULPROG zgpg30  
 TD 65536  
 SOLVENT CDC13  
 NS 331  
 DS 4  
 SWH 24038.461 Hz  
 FIDRES 0.366798 Hz  
 AQ 1.3631988 sec  
 RG 203  
 DW 20.800 usec  
 DE 6.50 usec  
 TE -1055.0 K  
 D1 2.0000000 sec  
 D11 0.0300000 sec  
 TDO 1

===== CHANNEL f1 =====  
 NUC1 13C  
 P1 9.00 usec  
 PL1 -2.00 dB  
 PL1W 53.74446869 W  
 SFO1 100.6253446 MHz

===== CHANNEL f2 =====  
 CPDPRG2 waltz16  
 NUC2 1H  
 PCPD2 90.00 usec  
 PL2 -2.10 dB  
 PL12 13.60 dB  
 PL13 13.52 dB  
 PL2W 14.17683315 W  
 PL12W 0.38157439 W  
 PL13W 0.38866836 W  
 SFO2 400.1416006 MHz  
 SI 32768  
 SF 100.6152830 MHz  
 WDW EM  
 SSB 0  
 LB 1.00 Hz  
 GB 0  
 PC 1.40

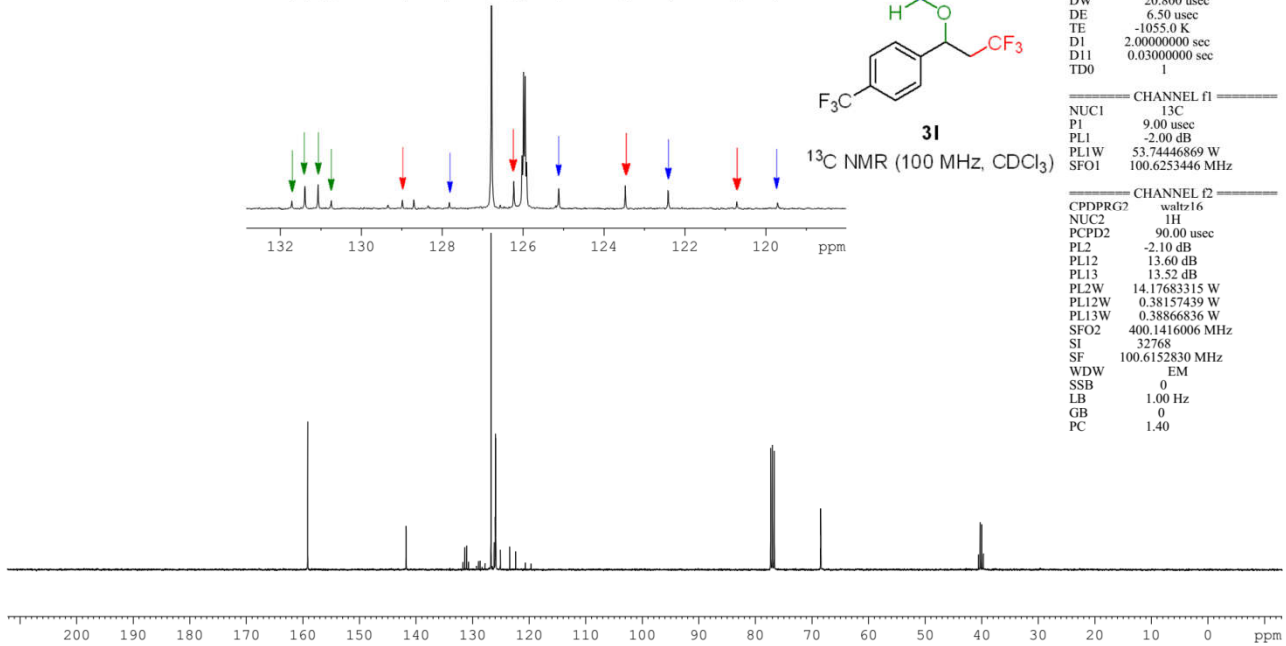

GCH-057-2 CDC13

-62.84  
-63.99

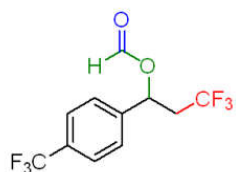

**31**

<sup>19</sup>F NMR (376 MHz, CDCl<sub>3</sub>)

```

NAME      180507
EXPNO     9
PROCNO    1
Date_     20180507
Time      15.44
INSTRUM   spect
PROBHD    5 mm PABBO BB-
PULPROG   zgpg30
TD         131072
SOLVENT   CDCl3
NS         16
DS         4
SWH       89285.711 Hz
FIDRES    0.681196 Hz
AQ         0.7340532 sec
RG         203
DW         5.600 usec
DE         6.50 usec
TE         -1485.9 K
D1         1.00000000 sec
D11        0.03000000 sec
D12        0.00002000 sec
TD0        1
    
```

```

===== CHANNEL f1 =====
NUC1      19F
P1        14.80 usec
PL1       -3.00 dB
PL1W      19.39594650 W
SFO1      376.4701248 MHz
    
```

```

===== CHANNEL f2 =====
CPDPRG2   waltz16
NUC2      1H
PCPD2     90.00 usec
PL2       -2.10 dB
PL12      13.60 dB
PL2W      14.17683315 W
PL12W     0.38157439 W
SFO2      400.1416006 MHz
SI         65536
SF        376.5077760 MHz
WDW        EM
SSB        0
LB         0.30 Hz
GB         0
PC         1.00
    
```

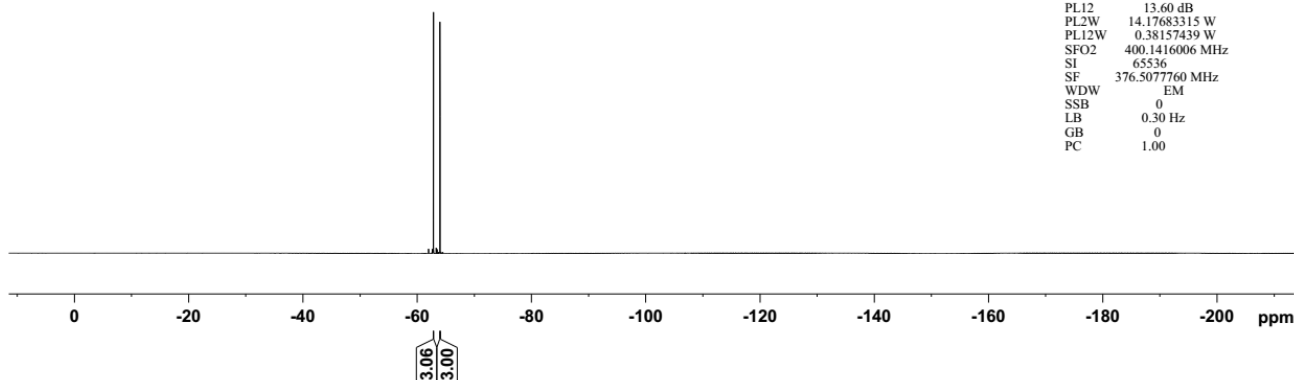

Monoisotopic Mass, Odd and Even Electron Ions

122 formula(e) evaluated with 1 results within limits (up to 50 best isotopic matches for each mass)

Elements Used:

C: 5-30 H: 0-60 O: 1-5 F: 0-8

default file

GCH-0529 581 (6.158) Cm (580:581-575:578)

TOF MS E1+  
5.32e+003

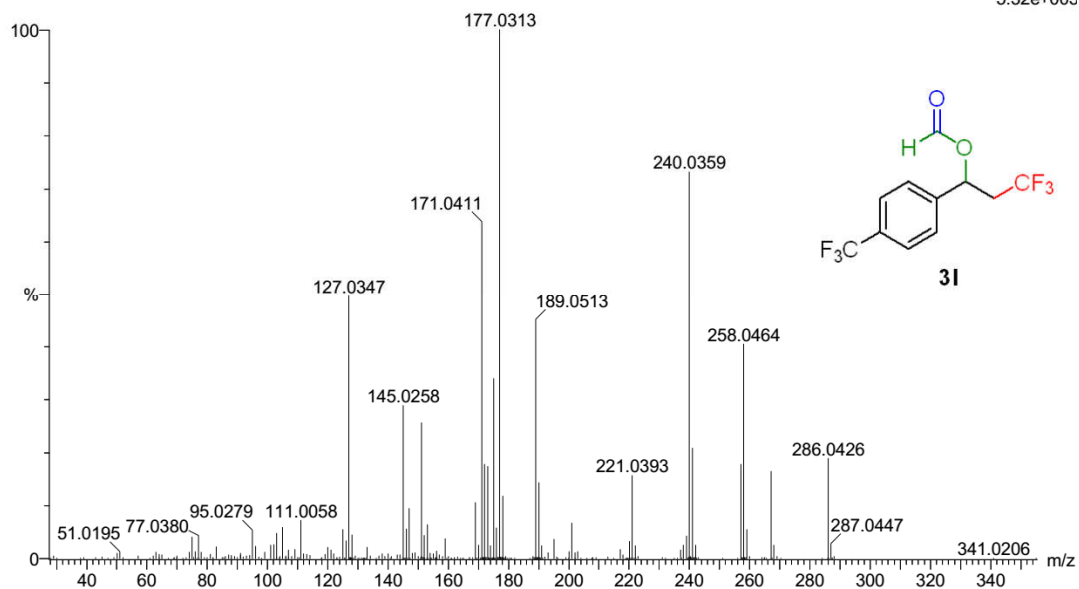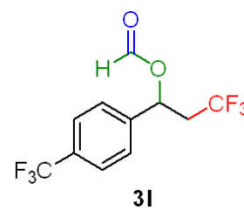

**31**

Minimum: -1.5  
Maximum: 5.0 1.0 50.0

| Mass     | Calc. Mass | mDa  | PPM  | DBE | i-FIT | Formula      |
|----------|------------|------|------|-----|-------|--------------|
| 286.0426 | 286.0428   | -0.2 | -0.7 | 5.0 | 1.4   | C11 H8 O2 F6 |

GCH-I-036-4 CDCl3

8.079  
8.072  
8.051

7.458  
7.368  
7.260

6.256  
6.247  
6.234  
6.225

3.923  
2.922  
2.897  
2.873  
2.859  
2.849  
2.835  
2.811  
2.787  
2.753  
2.633  
2.608  
2.598  
2.583  
2.572  
2.560  
2.546  
2.535  
2.520  
2.509  
1.570

NAME 180123  
EXPNO 13  
PROCNO 1  
Date\_ 20180123  
Time\_ 15.59  
INSTRUM spect  
PROBHD 5 mm PABBO BB-  
PULPROG zg30  
TD 65536  
SOLVENT CDCl3  
NS 16  
DS 2  
SWH 8223.685 Hz  
FIDRES 0.125483 Hz  
AQ 3.9846387 sec  
RG 203  
DW 60.800 usec  
DE 6.50 usec  
TE 2554.2 K  
D1 1.0000000 sec  
TDO 1

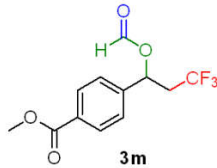

<sup>1</sup>H NMR (400 MHz, CDCl<sub>3</sub>)

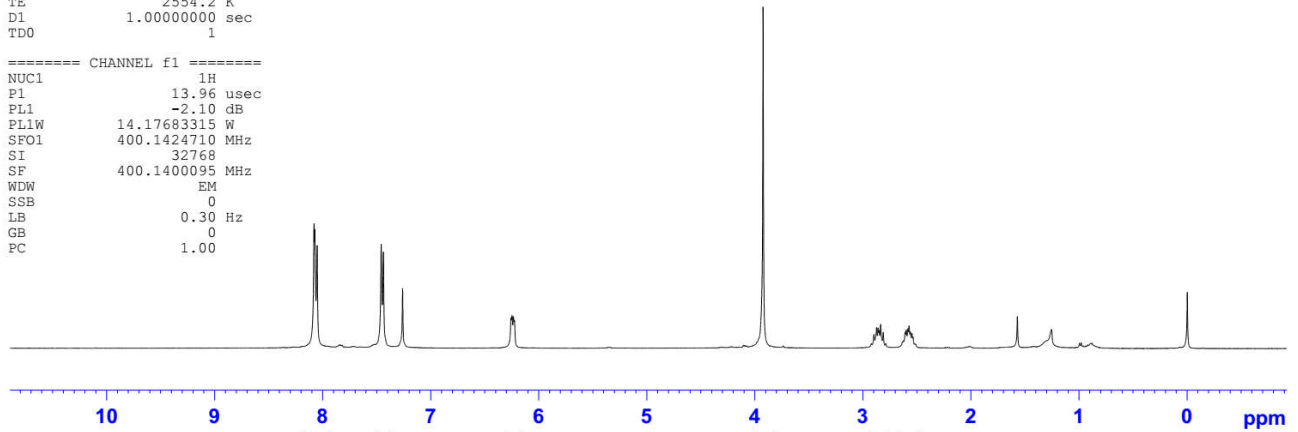

GCH-I-036-4 CDCl3

166.23  
159.16  
142.51

130.66  
130.10  
128.96  
126.24  
126.20  
123.44  
120.68

77.32  
77.00  
76.68  
68.57  
68.54  
68.50  
68.47

52.11  
40.42  
40.13  
39.85  
39.56

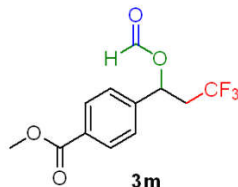

<sup>13</sup>C NMR (100 MHz, CDCl<sub>3</sub>)

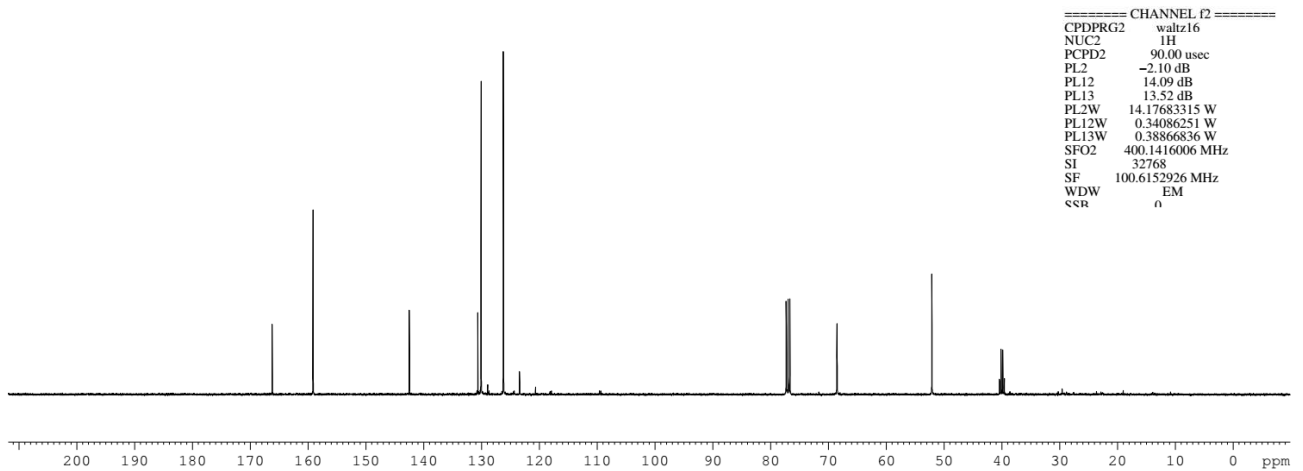

NAME 180123  
EXPNO 16  
PROCNO 1  
Date\_ 20180123  
Time\_ 16.30  
INSTRUM spect  
PROBHD 5 mm PABBO BB-  
PULPROG zgpg30  
TD 65536  
SOLVENT CDCl3  
NS 282  
DS 4  
SWH 24038.461 Hz  
FIDRES 0.366798 Hz  
AQ 1.3631988 sec  
RG 203  
DW 20.800 usec  
DE 6.50 usec  
TE 2509.9 K  
D1 2.0000000 sec  
D11 0.0300000 sec  
TDO 1

===== CHANNEL f1 =====  
NUC1 13C  
P1 9.00 usec  
PL1 -2.10 dB  
PL1W 53.74446869 W  
SFO1 100.6253446 MHz

===== CHANNEL f2 =====  
CPDPRG2 waltz16  
NUC2 1H  
PCPD2 90.00 usec  
PL2 -2.10 dB  
PL12 14.09 dB  
PL13 13.52 dB  
PL2W 14.17683315 W  
PL12W 0.34086251 W  
PL13W 0.38866836 W  
SFO2 400.1416006 MHz  
SI 32768  
SF 100.6152926 MHz  
WDW EM  
SSR 0

GCH-I-036-4 CDCl3

-63.99

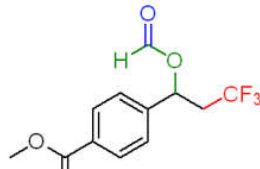

3m

<sup>19</sup>F NMR (376 MHz, CDCl<sub>3</sub>)

```

NAME      180123
EXPNO     10
PROCNO    1
Date_     20180123
Time      14.38
INSTRUM   spect
PROBHD    5 mm PABBO BB-
PULPROG   zgpg30
TD         131072
SOLVENT   CDCl3
NS         16
DS         4
SWH        89285.711 Hz
FIDRES     0.681196 Hz
AQ         0.7340532 sec
RG         203
DW         5.600 usec
DE         6.50 usec
TE         2531.6 K
D1         1.0000000 sec
D11        0.0300000 sec
D12        0.0000200 sec
TD0        1

```

```

----- CHANNEL f1 -----
NUC1       19F
P1         14.80 usec
PL1        -3.00 dB
PL1W       19.39594650 W
SFO1       376.4701248 MHz

```

```

----- CHANNEL f2 -----
CPDPRG2    waltz16
NUC2        1H
PCPD2      90.00 usec
PL2         -2.10 dB
PL12        14.09 dB
PL2W       14.17683315 W
PL12W      0.34086251 W
SFO2       400.1416006 MHz
SI          65536
SF         376.5077760 MHz
WDW         EM
SSB         0
LB          0.30 Hz
GB          0
PC          1.00

```

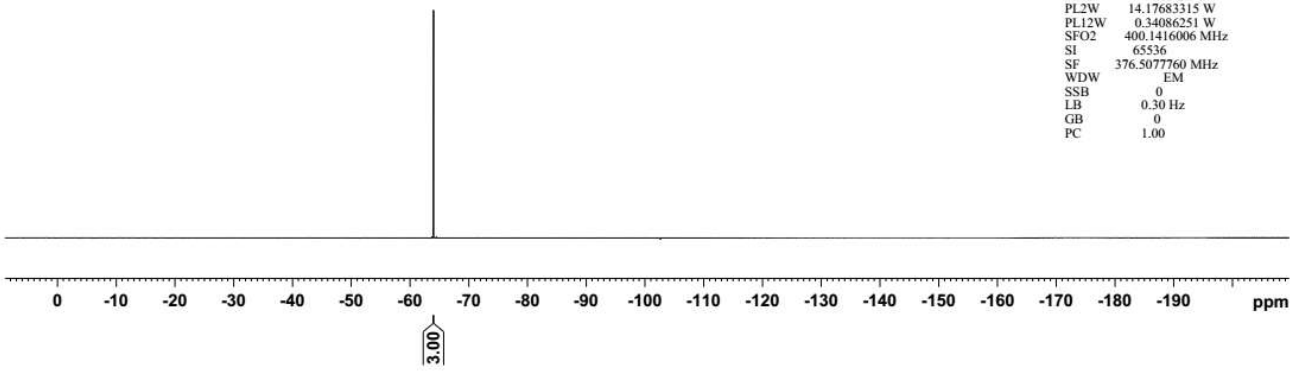

Monoisotopic Mass, Odd and Even Electron Ions

21 formula(e) evaluated with 1 results within limits (up to 50 best isotopic matches for each mass)

Elements Used:

C: 0-13 H: 0-16 O: 0-5 F: 0-3

default file

EI0126-H 1318 (9.689) Cm (1316:1318-1309:1313)

TOF MS EI+  
1.77e+004

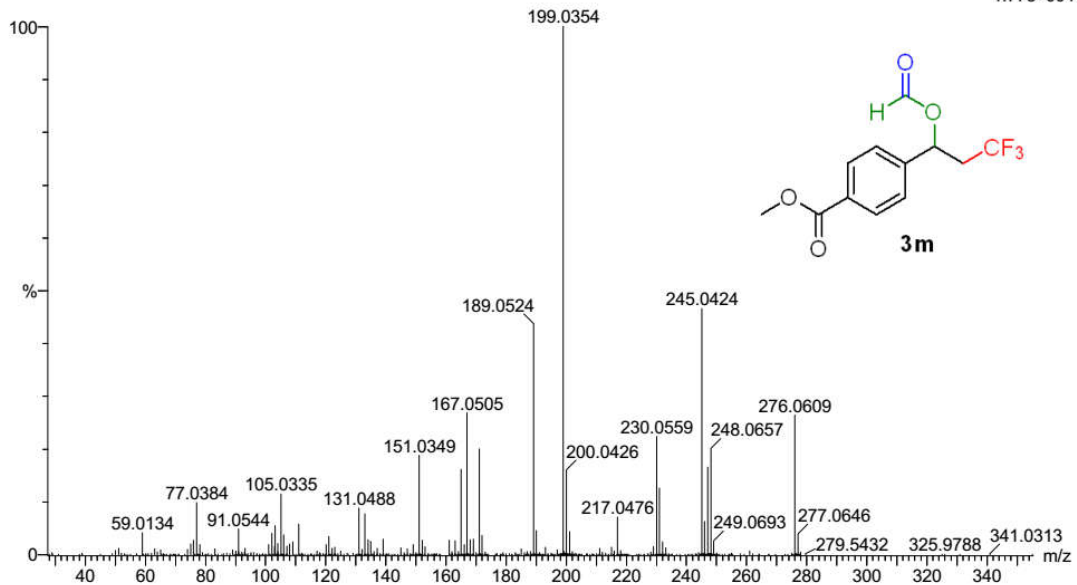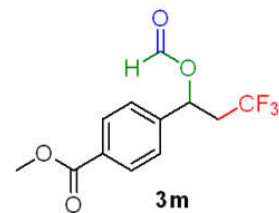

3m

| Mass     | Calc. Mass | mDa | PPM | DBE | i-FIT | Formula       |
|----------|------------|-----|-----|-----|-------|---------------|
| 276.0609 | 276.0609   | 0.0 | 0.0 | 6.0 | 0.6   | C12 H11 O4 F3 |

GCH-I-052-3 CDCl3

8.052  
 7.402  
 7.381  
 7.369  
 7.327  
 7.106  
 6.239  
 6.231  
 6.216  
 6.208  
 2.916  
 2.892  
 2.877  
 2.868  
 2.853  
 2.844  
 2.829  
 2.811  
 2.791  
 2.613  
 2.604  
 2.587  
 2.578  
 2.562  
 2.551  
 2.539  
 2.524  
 2.515  
 2.489  
 2.301

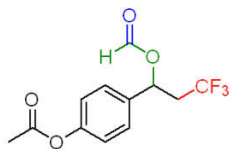

**3n**  
<sup>1</sup>H NMR (400 MHz, CDCl<sub>3</sub>)

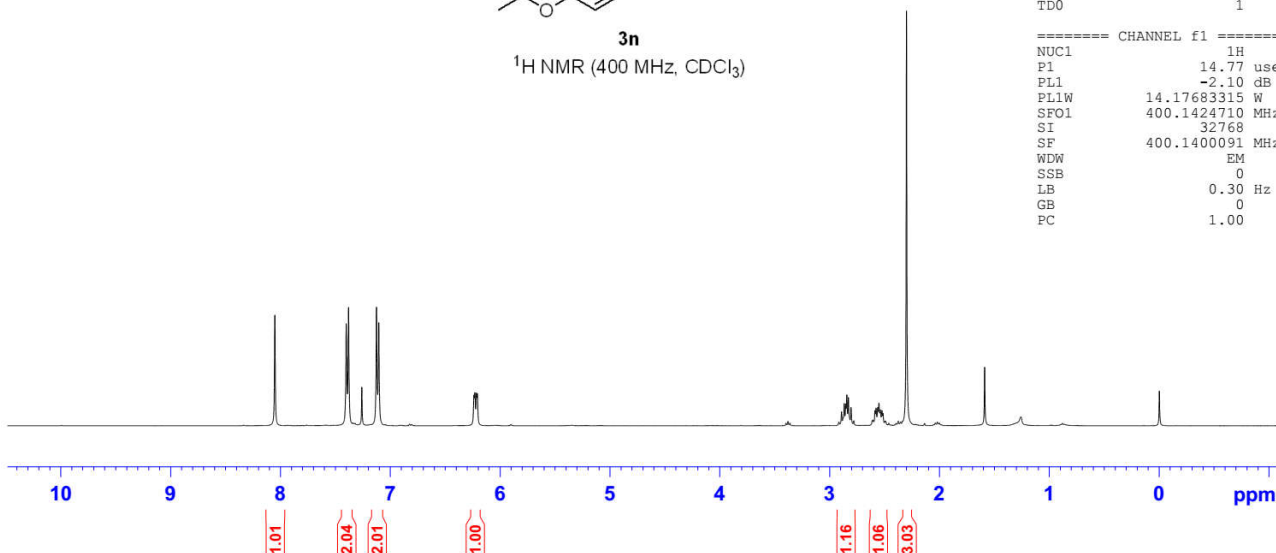

NAME 180424  
 EXPNO 18  
 PROCNO 1  
 Date\_ 20180424  
 Time 15.36  
 INSTRUM spect  
 PROBHD 5 mm PABBO BB-  
 PULPROG zg30  
 TD 65536  
 SOLVENT CDCl3  
 NS 16  
 DS 2  
 SWH 8223.685 Hz  
 FIDRES 0.125483 Hz  
 AQ 3.9846387 sec  
 RG 128  
 DW 60.800 usec  
 DE 6.50 usec  
 TE -1758.5 K  
 D1 1.00000000 sec  
 TD0 1

===== CHANNEL f1 =====  
 NUC1 1H  
 P1 14.77 usec  
 PL1 -2.10 dB  
 PL1W 14.17683315 W  
 SFO1 400.1424710 MHz  
 SI 32768  
 SF 400.1400091 MHz  
 WDW EM  
 SSB 0  
 LB 0.30 Hz  
 GB 0  
 PC 1.00

GCH-I-052-3 CDCl3

169.09  
 159.24  
 150.86  
 135.28  
 129.04  
 127.53  
 126.29  
 123.53  
 121.99  
 120.77  
 77.32  
 77.00  
 76.68  
 68.31  
 68.28  
 68.25  
 68.21  
 40.38  
 40.10  
 39.81  
 39.53  
 20.81

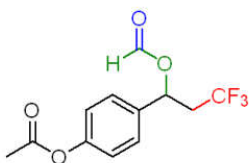

**3n**  
<sup>13</sup>C NMR (100 MHz, CDCl<sub>3</sub>)

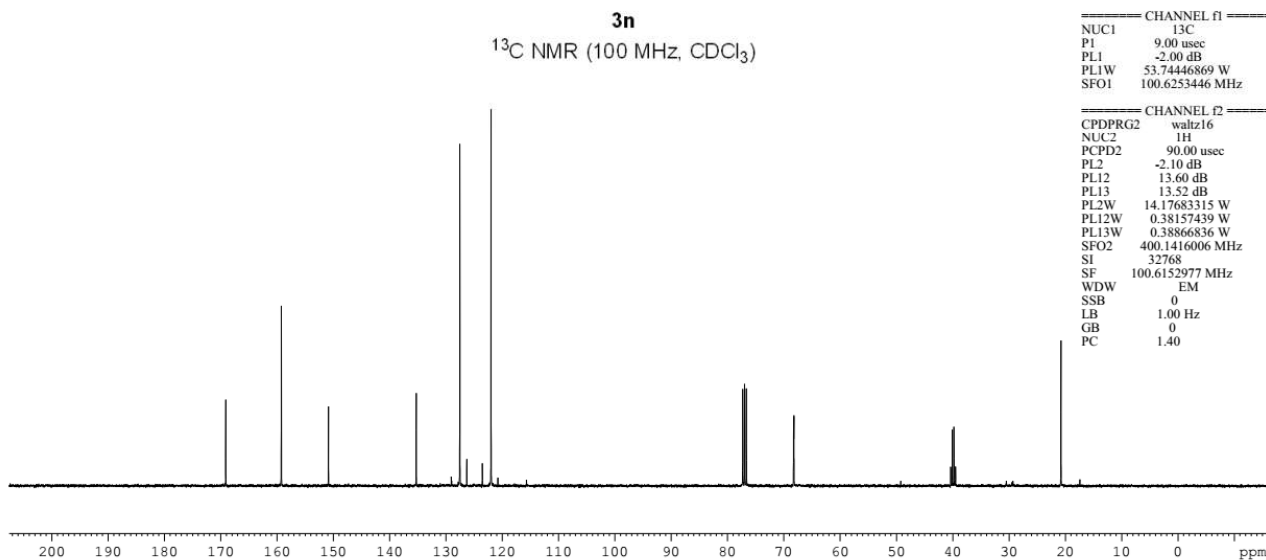

NAME 180424  
 EXPNO 22  
 PROCNO 1  
 Date\_ 20180424  
 Time 15.59  
 INSTRUM spect  
 PROBHD 5 mm PABBO BB-  
 PULPROG zgpg30  
 TD 65536  
 SOLVENT CDCl3  
 NS 101  
 DS 4  
 SWH 24038.461 Hz  
 FIDRES 0.366798 Hz  
 AQ 1.3631988 sec  
 RG 203  
 DW 20.800 usec  
 DE 6.50 usec  
 TE -1445.8 K  
 D1 2.00000000 sec  
 D11 0.03000000 sec  
 TD0 1

===== CHANNEL f1 =====  
 NUC1 13C  
 P1 9.00 usec  
 PL1 -2.00 dB  
 PL1W 53.74446869 W  
 SFO1 100.6253446 MHz

===== CHANNEL f2 =====  
 CDPDRG2 waltz16  
 NUC2 1H  
 PCPD2 90.00 usec  
 PL2 -2.10 dB  
 PL12 13.60 dB  
 PL13 13.52 dB  
 PL2W 14.17683315 W  
 PL12W 0.38157439 W  
 PL13W 0.38866836 W  
 SFO2 400.1416006 MHz  
 SI 32768  
 SF 100.6152977 MHz  
 WDW EM  
 SSB 0  
 LB 1.00 Hz  
 GB 0  
 PC 1.40

-64.15

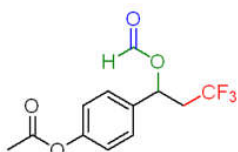

**3n**  
<sup>19</sup>F NMR (376 MHz, CDCl<sub>3</sub>)

```

NAME      180424
EXPNO     19
PROCNO    1
Date_     20180424
Time      15.37
INSTRUM   spect
PROBHDD   5 mm PABBO BB-
PULPROG   zgpg30
TD         131072
SOLVENT   CDCl3
NS         16
DS         4
SWH        89285.711 Hz
FIDRES     0.681196 Hz
AQ         0.7340532 sec
RG         203
DW         5.600 usec
DE         6.50 usec
TE         -1912.6 K
D1         1.00000000 sec
D11        0.03000000 sec
D12        0.00002000 sec
TD0        1
    
```

```

===== CHANNEL f1 =====
NUC1       19F
P1         14.80 usec
PL1        -3.00 dB
PL1W       19.39594650 W
SFO1       376.4701248 MHz
    
```

```

===== CHANNEL f2 =====
CPDPRG2    waltz16
NUC2        1H
PCPD2       90.00 usec
PL2         -2.10 dB
PL12        13.60 dB
PL2W        14.17683315 W
PL12W       0.38157439 W
SFO2        400.1416006 MHz
SI          65536
SF          376.5077760 MHz
WDW         EM
SSB         0
LB          0.30 Hz
GB          0
PC          1.00
    
```

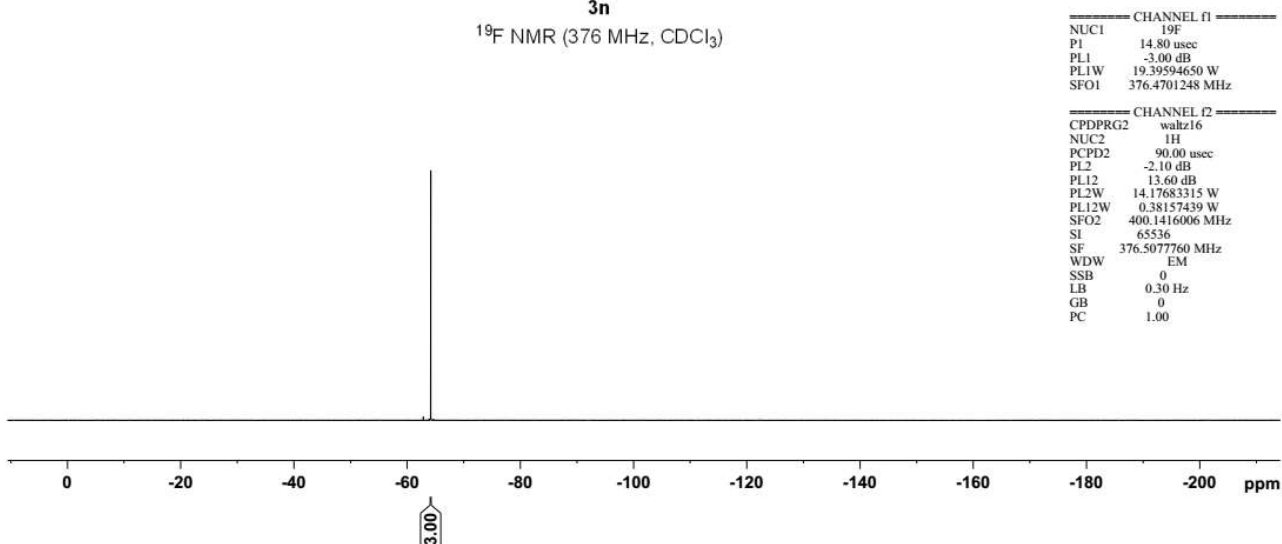

**Monoisotopic Mass, Odd and Even Electron Ions**

66 formula(e) evaluated with 1 results within limits (up to 50 best isotopic matches for each mass)

Elements Used:

C: 10-18 H: 0-60 O: 0-5 F: 0-3

default file

GCH-H-180504 1055 (8.687) Cm (1055-1046:1052)

TOF MS EI+  
 8.79e+003

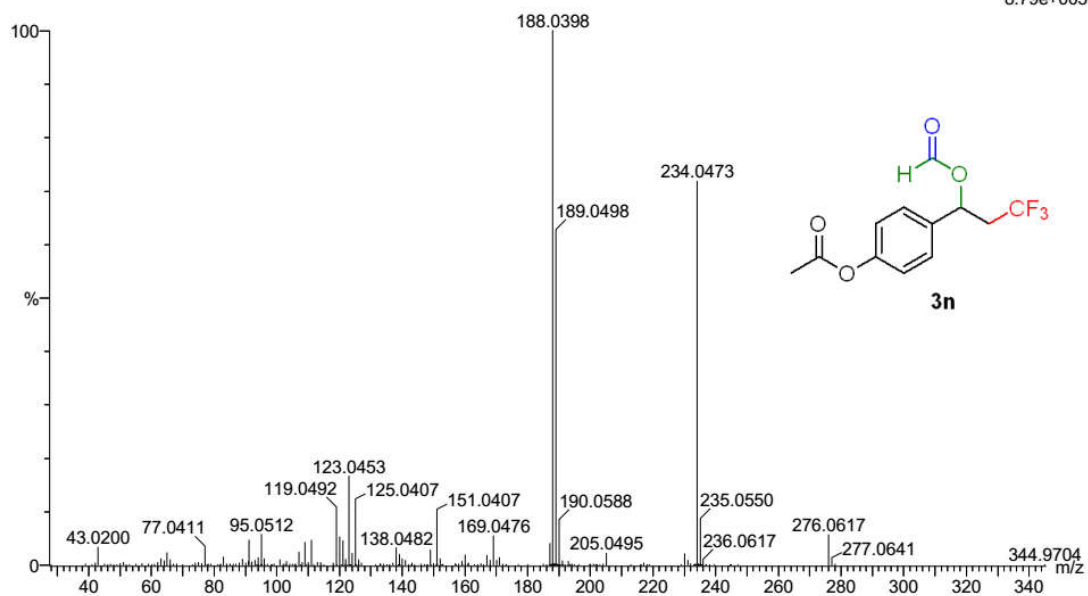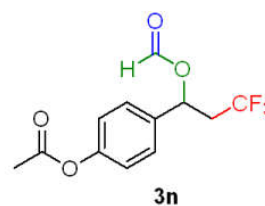

Minimum: -1.5  
 Maximum: 5.0 5.0 50.0

| Mass     | Calc. Mass | mDa | PPM | DBE | i-FIT | Formula       |
|----------|------------|-----|-----|-----|-------|---------------|
| 276.0617 | 276.0609   | 0.8 | 2.9 | 6.0 | 6.4   | C12 H11 O4 F3 |



GCH-I-037-2 CDC13

NAME 180119  
 EXPNO 44  
 PROCNO 1  
 Date\_ 20180119  
 Time\_ 16.01  
 INSTRUM spect  
 PROBHD 5 mm PABBO BB-  
 PULPROG zg30  
 TD 65536  
 SOLVENT CDC13  
 NS 16  
 DS 2  
 SWH 8223.685 Hz  
 FIDRES 0.125483 Hz  
 AQ 3.9846387 sec  
 RG 161  
 DW 60.800 usec  
 DE 6.50 usec  
 TE 2807.6 K  
 D1 1.00000000 sec  
 TD0 1

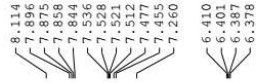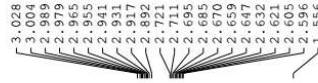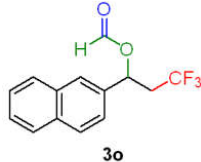

<sup>1</sup>H NMR (400 MHz, CDCl<sub>3</sub>)

===== CHANNEL f1 =====  
 NUC1 1H  
 P1 13.96 usec  
 PL1 -2.10 dB  
 PL1W 14.17683315 W  
 SFO1 400.1424710 MHz  
 SI 32768  
 SF 400.1400093 MHz  
 WDW EM  
 SSB 0  
 LB 0.30 Hz  
 GB 0  
 PC 1.00

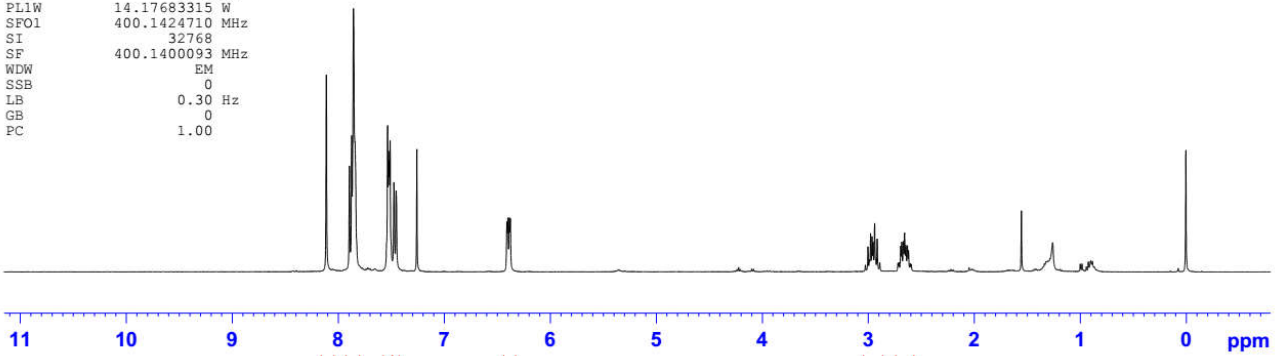

GCH-I-037-2 CDC13

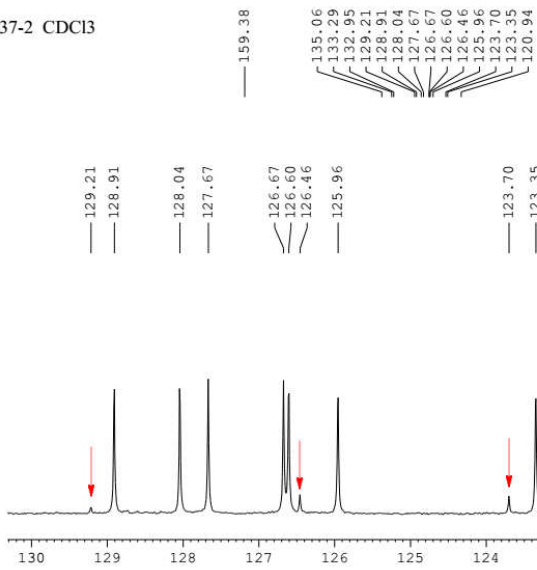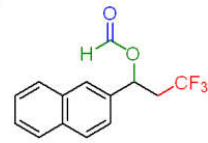

<sup>13</sup>C NMR (100 MHz, CDCl<sub>3</sub>)

NAME 180119  
 EXPNO 47  
 PROCNO 1  
 Date\_ 20180119  
 Time\_ 16.35  
 INSTRUM spect  
 PROBHD 5 mm PABBO BB-  
 PULPROG zgpg30  
 TD 65536  
 SOLVENT CDC13  
 NS 192  
 DS 4  
 SWH 24038.461 Hz  
 FIDRES 0.366798 Hz  
 AQ 1.3631988 sec  
 RG 203  
 DW 20.800 usec  
 DE 6.50 usec  
 TE 3032.0 K  
 D1 2.00000000 sec  
 D11 0.03000000 sec  
 TD0 1

===== CHANNEL f1 =====  
 NUC1 13C  
 P1 9.00 usec  
 PL1 -2.00 dB  
 PL1W 53.74446869 W  
 SFO1 100.6253446 MHz

===== CHANNEL f2 =====  
 CPDPRG2 waltz16  
 NUC2 1H  
 PCPD2 90.00 usec  
 PL2 -2.10 dB  
 PL12 14.09 dB  
 PL13 13.52 dB  
 PL2W 14.17683315 W  
 PL12W 0.34086251 W  
 PL13W 0.38866836 W  
 SFO2 400.1416006 MHz  
 SI 32768  
 SF 100.6153007 MHz  
 WDW EM  
 SSB 0  
 LB 1.00 Hz  
 GB 0  
 PC 1.40

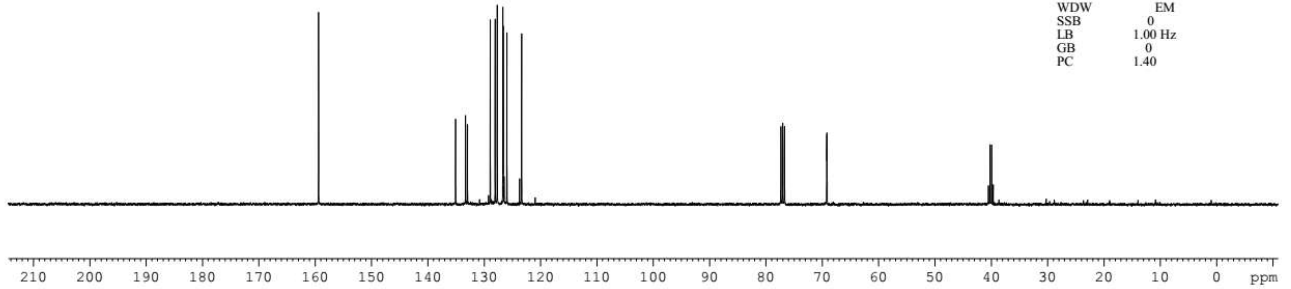

-64.05

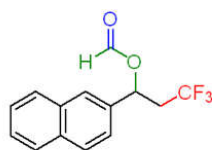

3o

<sup>19</sup>F NMR (376 MHz, CDCl<sub>3</sub>)

NAME 180119  
 EXPNO 43  
 PROCNO 1  
 Date\_ 20180119  
 Time 15.59  
 INSTRUM spect  
 PROBHD 5 mm PABBO BB-  
 PULPROG zgpg30  
 TD 131072  
 SOLVENT CDCl3  
 NS 16  
 DS 4  
 SWH 89285.711 Hz  
 FIDRES 0.681196 Hz  
 AQ 0.7340532 sec  
 RG 203  
 DW 5.600 usec  
 DE 6.50 usec  
 TE 2872.8 K  
 D1 1.00000000 sec  
 D11 0.03000000 sec  
 D12 0.00002000 sec  
 TDO 1

===== CHANNEL f1 =====  
 NUC1 19F  
 P1 14.80 usec  
 PL1 -3.00 dB  
 PL1W 19.39594650 W  
 SFO1 376.4701248 MHz

===== CHANNEL f2 =====  
 CPDPRG2 waltz16  
 NUC2 1H  
 PCPD2 90.00 usec  
 PL2 -2.10 dB  
 PL12 14.09 dB  
 PL2W 14.17683315 W  
 PL12W 0.34086251 W  
 SFO2 400.1416006 MHz  
 SI 65536  
 SF 376.5077760 MHz  
 WDW EM  
 SSB 0  
 LB 0.30 Hz  
 GB 0  
 PC 1.00

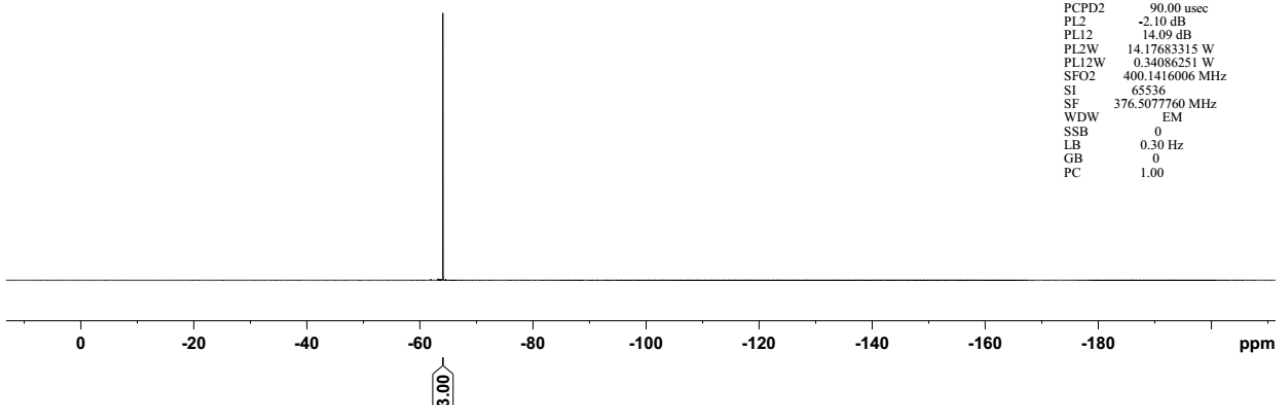

Monoisotopic Mass, Odd and Even Electron Ions

22 formula(e) evaluated with 1 results within limits (up to 50 best isotopic matches for each mass)

Elements Used:

C: 0-15 H: 0-16 O: 0-5 F: 0-3

default file

EI0126-H 1444 (10.362) Cm (1443:1444-1438:1440)

TOF MS EI+  
 1.09e+004

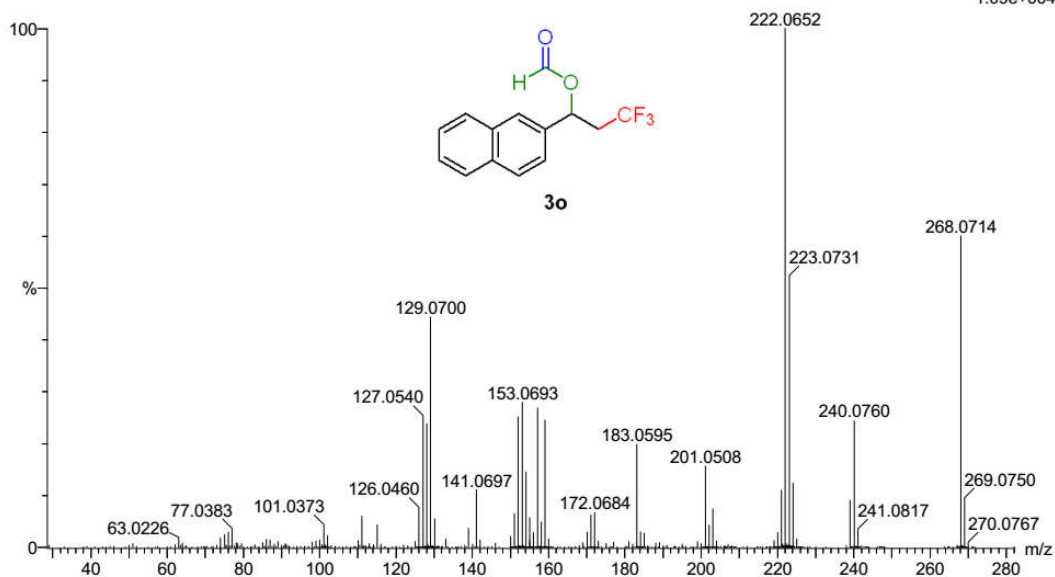

Minimum: -1.5  
 Maximum: 5.0 10.0 50.0

| Mass     | Calc. Mass | mDa | PPM | DBE | i-FIT | Formula       |
|----------|------------|-----|-----|-----|-------|---------------|
| 268.0714 | 268.0711   | 0.3 | 1.1 | 8.0 | 1.8   | C14 H11 O2 F3 |

GCH-I-053-1 CDCl3

NAME 180502  
EXPNO 2  
PROCNO 1  
Date\_ 20180502  
Time 11.00  
INSTRUM spect  
PROBHD 5 mm PABBO BB-  
PULPROG zg30  
TD 65536  
SOLVENT CDCl3  
NS 16  
DS 2  
SWH 8223.685 Hz  
FIDRES 0.125483 Hz  
AQ 3.9846387 sec  
RG 144  
DW 60.800 usec  
DE 6.50 usec  
TE -2268.4 K  
D1 1.0000000 sec  
TD0 1

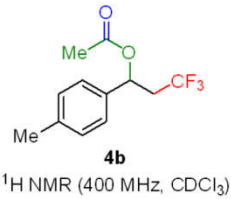

===== CHANNEL f1 =====  
NUC1 1H  
P1 14.77 usec  
PL1 -2.10 dB  
PL1W 14.17683315 W  
SFO1 400.1424710 MHz  
SI 32768  
SF 400.1400093 MHz  
WDW EM  
SSB 0  
LB 0.30 Hz  
GB 0  
PC 1.00

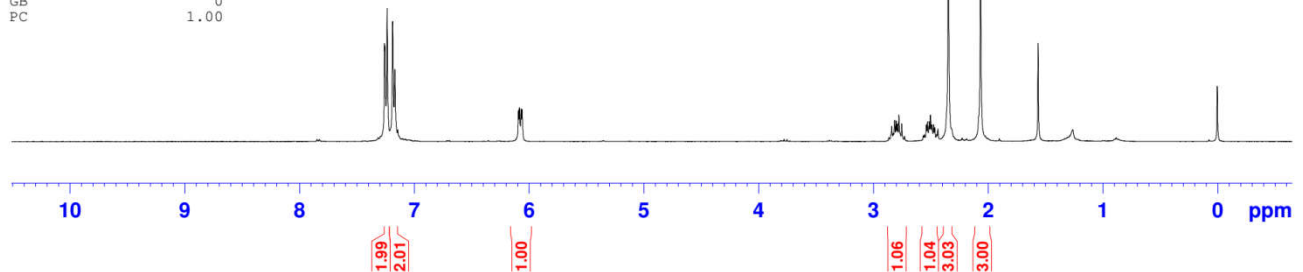

GCH-I-053-1 CDCl3

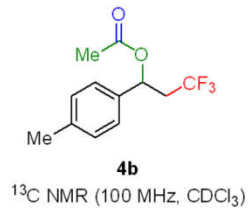

NAME 180502  
EXPNO 5  
PROCNO 1  
Date\_ 20180502  
Time 11.47  
INSTRUM spect  
PROBHD 5 mm PABBO BB-  
PULPROG zgpg30  
TD 65536  
SOLVENT CDCl3  
NS 400  
DS 4  
SWH 24038.461 Hz  
FIDRES 0.366798 Hz  
AQ 1.3631988 sec  
RG 203  
DW 20.800 usec  
DE 6.50 usec  
TE -1264.3 K  
D1 2.0000000 sec  
D11 0.0300000 sec  
TD0 1

===== CHANNEL f1 =====  
NUC1 13C  
P1 9.00 usec  
PL1 -2.00 dB  
PL1W 53.74446869 W  
SFO1 100.6253446 MHz

===== CHANNEL f2 =====  
CPDPRG2 waltz16  
NUC2 1H  
PCPD2 90.00 usec  
PL2 -2.10 dB  
PL12 13.60 dB  
PL13 13.52 dB  
PL2W 14.17683315 W  
PL12W 0.38157439 W  
PL13W 0.38866836 W  
SFO2 400.1416006 MHz  
SI 32768  
SF 100.6152970 MHz  
WDW EM  
SSB 0  
LB 1.00 Hz  
GB 0  
PC 1.40

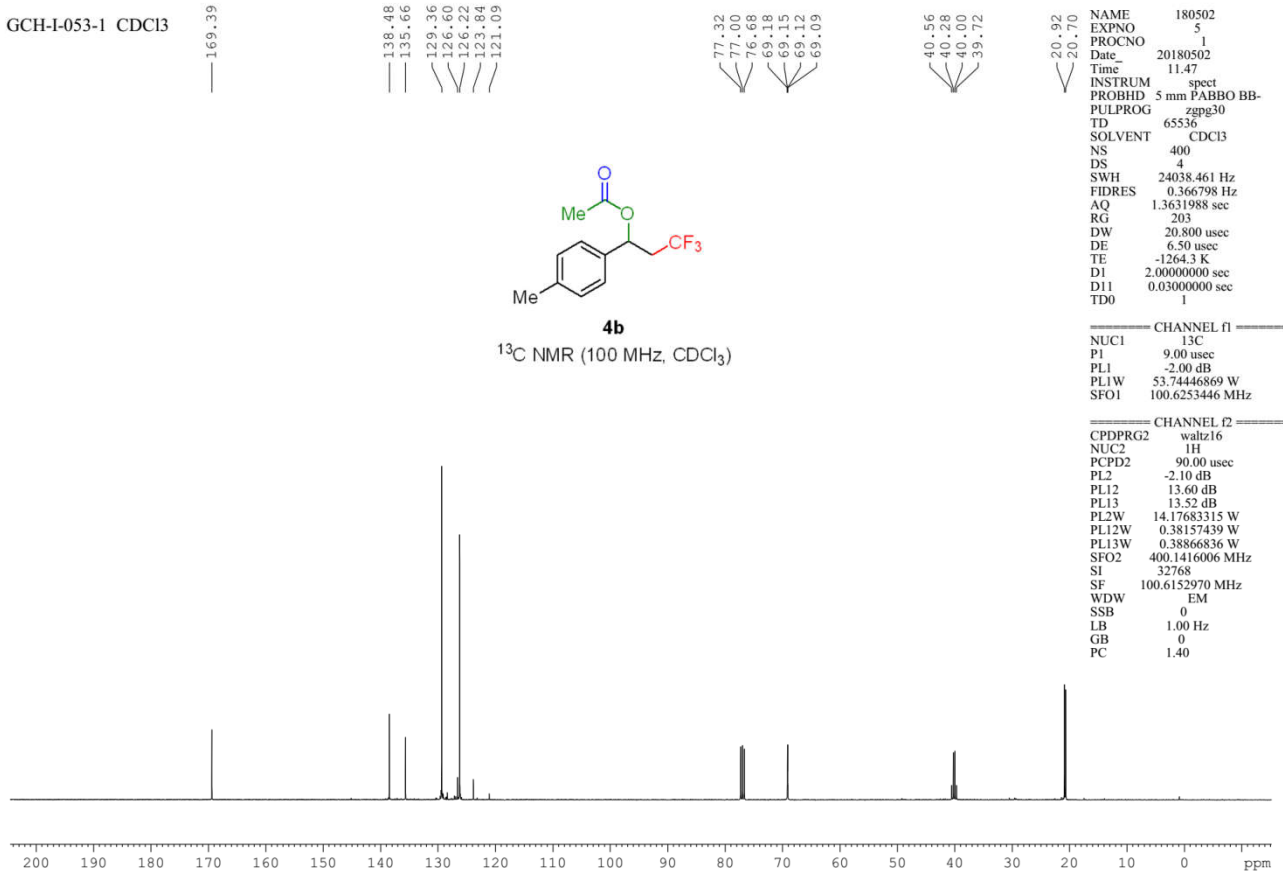

GCH-I-053-1 CDC13

-64.16

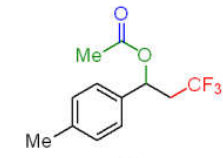

**4b**

<sup>19</sup>F NMR (376 MHz, CDCl<sub>3</sub>)

```

NAME      180502
EXPNO     3
PROCNO    1
Date_     20180502
Time      11.01
INSTRUM   spect
PROBHD    5 mm PABBO BB-
PULPROG   zgpg30
TD         131072
SOLVENT   CDCl3
NS         16
DS         4
SWH       89285.711 Hz
FIDRES    0.681196 Hz
AQ         0.7340532 sec
RG         203
DW         5.600 usec
DE         6.50 usec
TE         -2753.1 K
D1         1.00000000 sec
D11        0.03000000 sec
D12        0.00002000 sec
TD0        1
    
```

```

===== CHANNEL f1 =====
NUC1      19F
P1         14.80 usec
PL1        -3.00 dB
PL1W      19.39594650 W
SFO1      376.4701248 MHz
    
```

```

===== CHANNEL f2 =====
CPDPRG2   waltz16
NUC2      1H
PCPD2     90.00 usec
PL2        -2.10 dB
PL12       13.60 dB
PL12W     14.17683315 W
PL12W     0.38157439 W
SFO2      400.1416006 MHz
SI         65536
SF         376.5077760 MHz
WDW        EM
SSB         0
LB         0.30 Hz
GB         0
PC         1.00
    
```

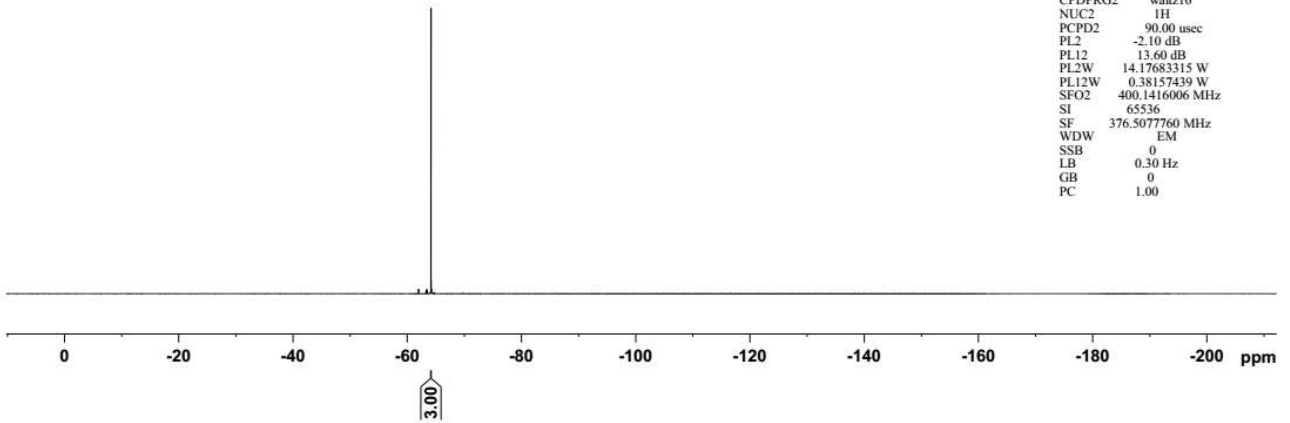

**Monoisotopic Mass, Odd and Even Electron Ions**

40 formula(e) evaluated with 1 results within limits (up to 50 best isotopic matches for each mass)

Elements Used:

C: 10-13 H: 0-60 O: 0-5 F: 0-3

default file

GCH-H-180504 788 (7.262) Cm (787:788-780:783)

TOF MS EI+  
6.66e+003

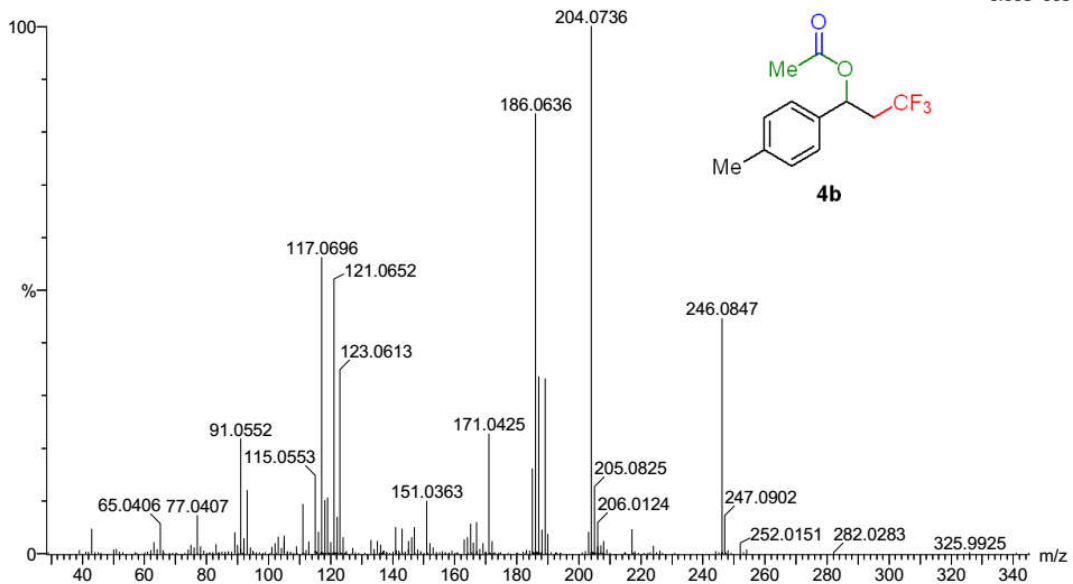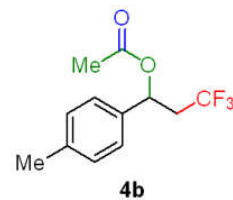

**4b**

| Mass     | Calc. Mass | mDa  | PPM  | DBE | i-FIT | Formula       |
|----------|------------|------|------|-----|-------|---------------|
| 246.0847 | 246.0868   | -2.1 | -8.5 | 5.0 | 4.5   | C12 H13 O2 F3 |

GCH-I-041-2 CDC13

7.396  
7.375  
7.268  
7.260

6.120  
6.111  
6.096  
6.087

2.870  
2.845  
2.832  
2.801  
2.801  
2.796  
2.782  
2.771  
2.758  
2.733  
2.733  
2.566  
2.557  
2.540  
2.514  
2.514  
2.504  
2.493  
2.475  
2.466  
2.449  
2.440  
1.563  
1.309

NAME 180330  
EXPNO 34  
PROCNO 1  
Date\_ 20180330  
Time 15.28  
INSTRUM spect  
PROBHD 5 mm PABBO BB-  
PULPROG zg30  
TD 65536  
SOLVENT CDC13  
NS 16  
DS 2  
SWH 8223.685 Hz  
FIDRES 0.125483 Hz  
AQ 3.9846387 sec  
RG 144  
DW 60.800 usec  
DE 6.50 usec  
TE -2415.6 K  
D1 1.00000000 sec  
TDO 1

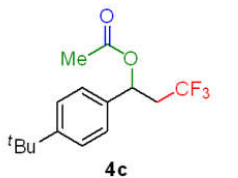

<sup>1</sup>H NMR (400 MHz, CDCl<sub>3</sub>)

===== CHANNEL f1 =====  
NUC1 1H  
P1 14.77 usec  
PL1 -2.10 dB  
PL1W 14.17683315 W  
SFO1 400.1424710 MHz  
SI 32768  
SF 400.1400091 MHz  
WDW EM  
SSB 0  
LB 0.30 Hz  
GB 0  
PC 1.00

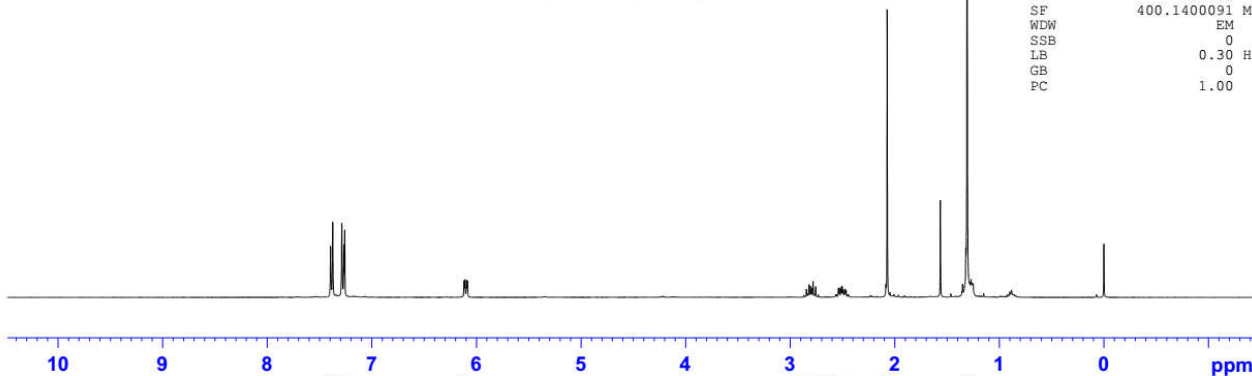

GCH-I-041-2 CDC13

169.42

151.63

135.60  
129.39  
126.64  
126.01  
125.63  
123.88  
121.12

77.32  
77.00  
76.68  
69.07  
69.04  
69.00  
68.97

40.59  
40.31  
40.03  
39.75  
34.49  
31.13

20.74

NAME 180330  
EXPNO 40  
PROCNO 1  
Date\_ 20180330  
Time 16.00  
INSTRUM spect  
PROBHD 5 mm PABBO BB-  
PULPROG zgpg30  
TD 65536  
SOLVENT CDC13  
NS 175  
DS 4  
SWH 24038.461 Hz  
FIDRES 0.366798 Hz  
AQ 1.3631988 sec  
RG 203  
DW 20.800 usec  
DE 6.50 usec  
TE -2286.6 K  
D1 2.00000000 sec  
D11 0.03000000 sec  
TDO 1

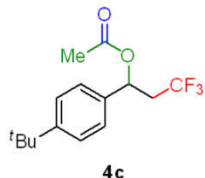

<sup>13</sup>C NMR (100 MHz, CDCl<sub>3</sub>)

===== CHANNEL f1 =====  
NUC1 13C  
P1 9.00 usec  
PL1 -2.00 dB  
PL1W 53.74446869 W  
SFO1 100.6253446 MHz

===== CHANNEL f2 =====  
CPDPRG2 waltz16  
NUC2 1H  
PCPD2 90.00 usec  
PL2 -2.10 dB  
PL12 13.60 dB  
PL13 13.52 dB  
PL2W 14.17683315 W  
PL12W 0.38157439 W  
PL13W 0.38666836 W  
SFO2 400.1416006 MHz  
SI 32768  
SF 100.6152948 MHz  
WDW EM  
SSB 0  
LB 1.00 Hz  
GB 0  
PC 1.40

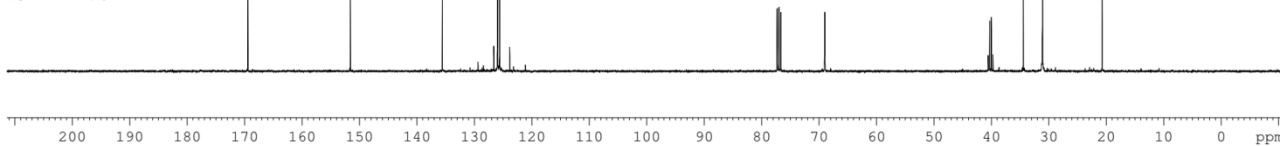

GCH-I-041-2 CDC13

-64.24

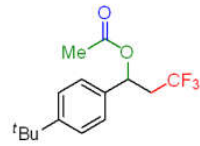

4c

<sup>19</sup>F NMR (376 MHz, CDCl<sub>3</sub>)

```

NAME      180330
EXPNO     35
PROCNO    1
Date_     20180330
Time      15.30
INSTRUM   spect
PROBHD    5 mm PABBO BB-
PULPROG   zgpg30
TD         131072
SOLVENT   CDCl3
NS         16
DS         4
SWH        89285.711 Hz
FIDRES     0.681196 Hz
AQ         0.7340532 sec
RG         203
DW         5.600 usec
DE         6.50 usec
TE         -2388.3 K
D1         1.00000000 sec
D11        0.03000000 sec
D12        0.00002000 sec
TD0        1
    
```

```

===== CHANNEL f1 =====
NUC1      19F
P1         14.80 usec
PL1        -3.00 dB
PL1W       19.39594650 W
SFO1       376.4701248 MHz
    
```

```

===== CHANNEL f2 =====
CPDPRG2   waltz16
NUC2       1H
PCPD2     90.00 usec
PL2        -2.10 dB
PL12       13.60 dB
PL2W       14.17683315 W
PL12W      0.38157439 W
SFO2       400.1416006 MHz
SI         65536
SF         376.5077760 MHz
WDW        EM
SSB         0
LB         0.30 Hz
GB          0
PC          1.00
    
```

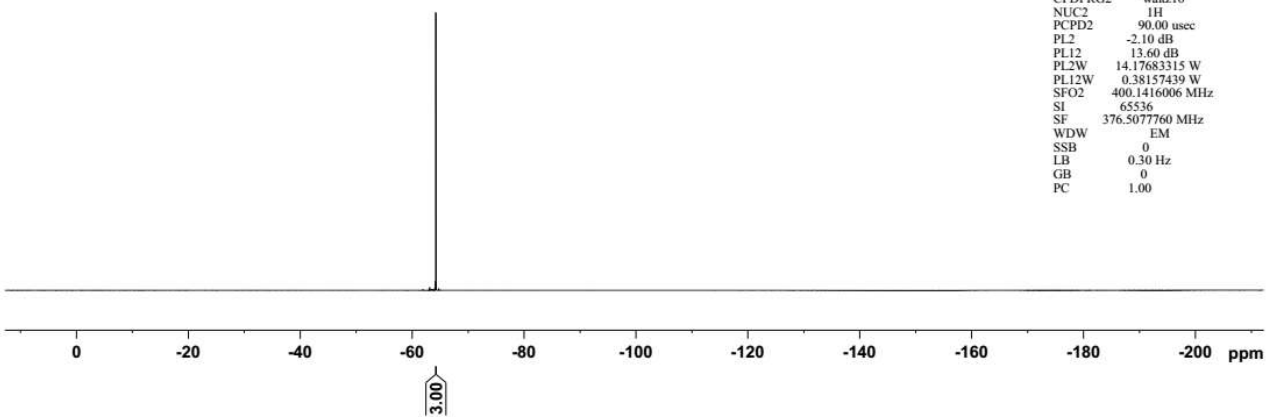

Monoisotopic Mass, Odd and Even Electron Ions

17 formula(e) evaluated with 1 results within limits (up to 50 best isotopic matches for each mass)

Elements Used:

C: 0-30 H: 0-50 O: 0-4 F: 3-3

default file

GCH-H 1036 (8.585) Cm (1036-(1033:1034+1046:1048))

TOF MS EI+  
2.83e+003

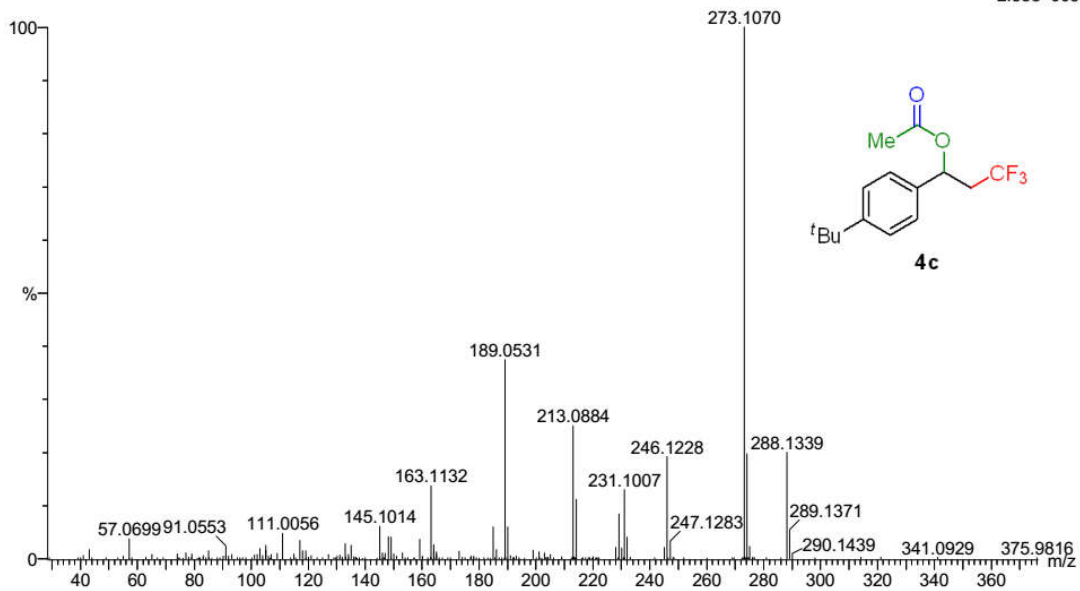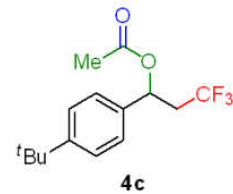

4c

| Mass     | Calc. Mass | mDa | PPM | DBE | i-FIT | Formula       |
|----------|------------|-----|-----|-----|-------|---------------|
| 288.1339 | 288.1337   | 0.2 | 0.7 | 5.0 | 11.9  | C15 H19 O2 F3 |

GCH-I-043-2 CDC13

NAME 180326  
EXPNO 46  
PROCNO 1  
Date\_ 20180326  
Time\_ 15.10  
INSTRUM spect  
PROBHD 5 mm PABBO BB-  
PULPROG zg30  
TD 65536  
SOLVENT CDC13  
NS 16  
DS 2  
SWH 8223.685 Hz  
FIDRES 0.125483 Hz  
AQ 3.9846387 sec  
RG 203  
DW 60.800 usec  
DE 6.50 usec  
TE -2606.9 K  
D1 1.0000000 sec  
TD0 1

7.607  
7.586  
7.564  
7.542  
7.485  
7.466  
7.439  
7.427  
7.419  
7.381  
7.362  
7.344  
7.260

6.171  
6.162  
6.148  
6.138

2.916  
2.891  
2.878  
2.867  
2.853  
2.842  
2.829  
2.818  
2.804  
2.779  
2.627  
2.607  
2.591  
2.575  
2.565  
2.553  
2.537  
2.527  
2.511  
2.501  
1.555

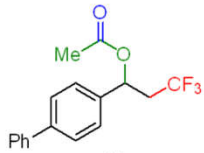

<sup>1</sup>H NMR (400 MHz, CDCl<sub>3</sub>)

===== CHANNEL f1 =====  
NUC1 1H  
P1 14.77 usec  
PL1 -2.10 dB  
PL1W 14.17683315 W  
SFO1 400.1424710 MHz  
SI 32768  
SF 400.1400090 MHz  
WDW EM  
SSB 0  
LB 0.30 Hz  
GB 0  
PC 1.00

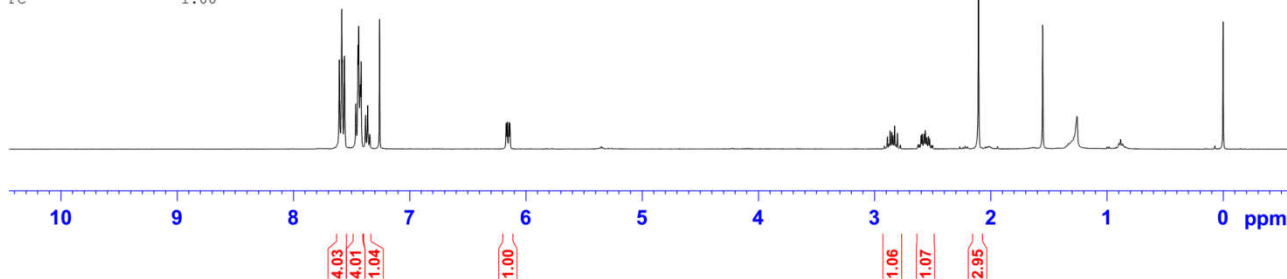

GCH-I-043-2 CDC13

NAME 180326  
EXPNO 53  
PROCNO 1  
Date\_ 20180326  
Time\_ 15.51  
INSTRUM spect  
PROBHD 5 mm PABBO BB-  
PULPROG zgpg30  
TD 65536  
SOLVENT CDC13  
NS 455  
DS 4  
SWH 24038.461 Hz  
FIDRES 0.366798 Hz  
AQ 1.3631988 sec  
RG 203  
DW 20.800 usec  
DE 6.50 usec  
TE -2783.2 K  
D1 2.0000000 sec  
D11 0.0300000 sec  
TD0 1

169.57

141.70  
140.36  
137.52  
129.33  
128.81  
127.56  
127.54  
127.09  
126.76  
126.57  
123.82  
121.06

77.32  
77.00  
76.68  
69.19  
69.16  
69.13  
69.10

40.71  
40.43  
40.15  
39.87

20.94

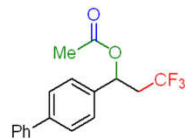

<sup>13</sup>C NMR (100 MHz, CDCl<sub>3</sub>)

===== CHANNEL f1 =====  
NUC1 13C  
P1 9.00 usec  
PL1 -2.00 dB  
PL1W 53.74446869 W  
SFO1 100.6253446 MHz

===== CHANNEL f2 =====  
CPDPRG2 waltz16  
NUC2 1H  
PCPD2 90.00 usec  
PL2 -2.10 dB  
PL12 13.60 dB  
PL13 13.52 dB  
PL2W 14.17683315 W  
PL12W 0.38157439 W  
PL13W 0.38866836 W  
SFO2 400.1416006 MHz  
SI 32768  
SF 100.6152890 MHz  
WDW EM  
SSB 0  
LB 1.00 Hz  
GB 0  
PC 1.40

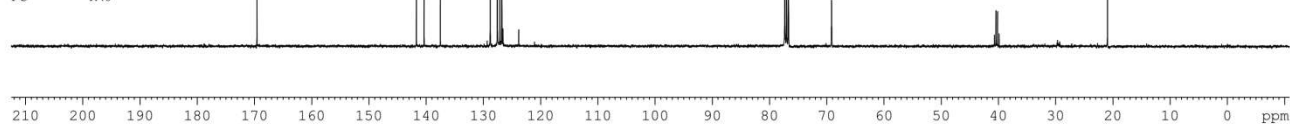

GCH-I-043-2 CDCl3

-64.11

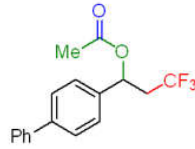

4d

<sup>19</sup>F NMR (376 MHz, CDCl<sub>3</sub>)

```

NAME      180326
EXPNO     47
PROCNO    1
Date_     20180326
Time      15.12
INSTRUM   spect
PROBHD    5 mm PABBO BB-
PULPROG   zgpg30
TD         131072
SOLVENT   CDCl3
NS         16
DS         4
SWH        89285.711 Hz
FIDRES     0.681196 Hz
AQ         0.7340532 sec
RG         203
DW         5.600 usec
DE         6.50 usec
TE         -2591.5 K
D1         1.00000000 sec
D11        0.03000000 sec
D12        0.00002000 sec
TD0        1
    
```

```

===== CHANNEL f1 =====
NUC1       19F
P1         14.80 usec
PL1        -3.00 dB
PL1W       19.39594650 W
SFO1       376.4701248 MHz
    
```

```

===== CHANNEL f2 =====
CPDPRG2    waltz16
NUC2        1H
PCPD2      90.00 usec
PL2         -2.10 dB
PL12        13.60 dB
PL2W       14.17683315 W
PL12W       0.38157439 W
SFO2       400.1416006 MHz
SI          65536
SF         376.5077760 MHz
WDW         EM
SSB         0
LB          0.30 Hz
GB          0
PC          1.00
    
```

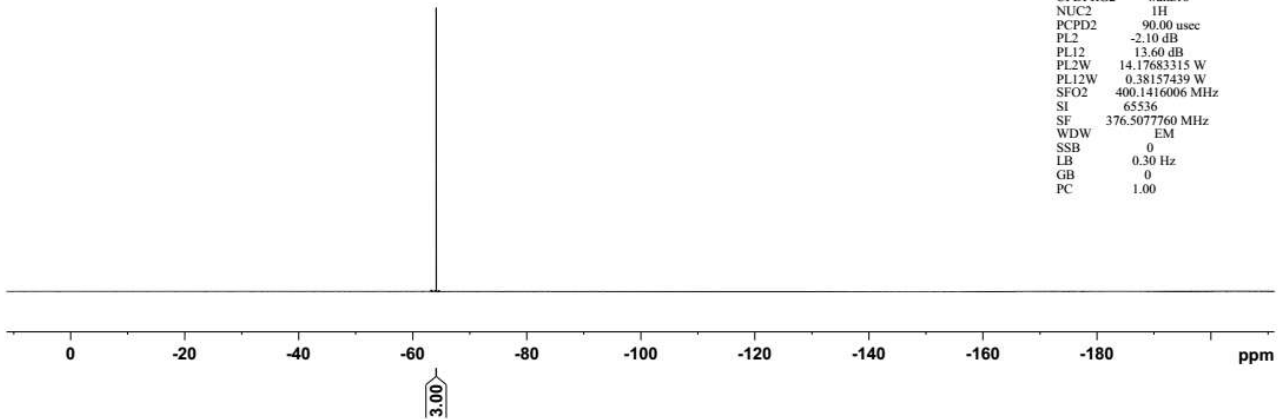

Monoisotopic Mass, Odd and Even Electron Ions  
 18 formula(e) evaluated with 1 results within limits (up to 50 best isotopic matches for each mass)  
 Elements Used:  
 C: 0-30 H: 0-50 O: 0-4 F: 3-3  
 default file  
 GCH-H 1490 (11.007) Cm (1490-1485:1487)

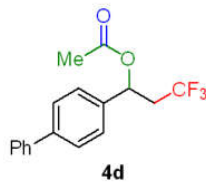

TOF MS EI+  
6.93e+003

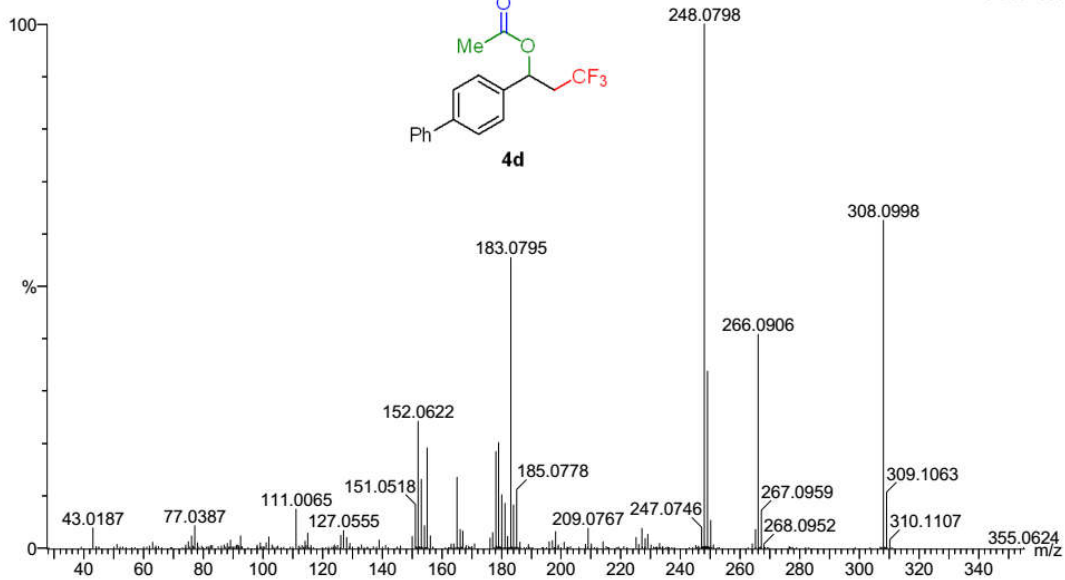

| Mass     | Calc. Mass | mDa  | PPM  | DBE | i-FIT | Formula       |
|----------|------------|------|------|-----|-------|---------------|
| 308.0998 | 308.1024   | -2.6 | -8.4 | 9.0 | 7.9   | C17 H15 O2 F3 |



Copper-Catalyzed Trifluoromethylation and Cyclization of Aromatic-Sulfonyl-Group-Tethered Alkenes for the Construction of 1,2-Benzothiazinane Dioxide Type Compounds

Xiang Dong,<sup>[a]</sup> Rui Sang,<sup>[a]</sup> Qiang Wang,<sup>[a,b]</sup> Xiang-Ying Tang,<sup>[a,b]</sup> and Min Shi<sup>[a,b]</sup>

Chem. Eur. J. 2013, 19, 16910–16915

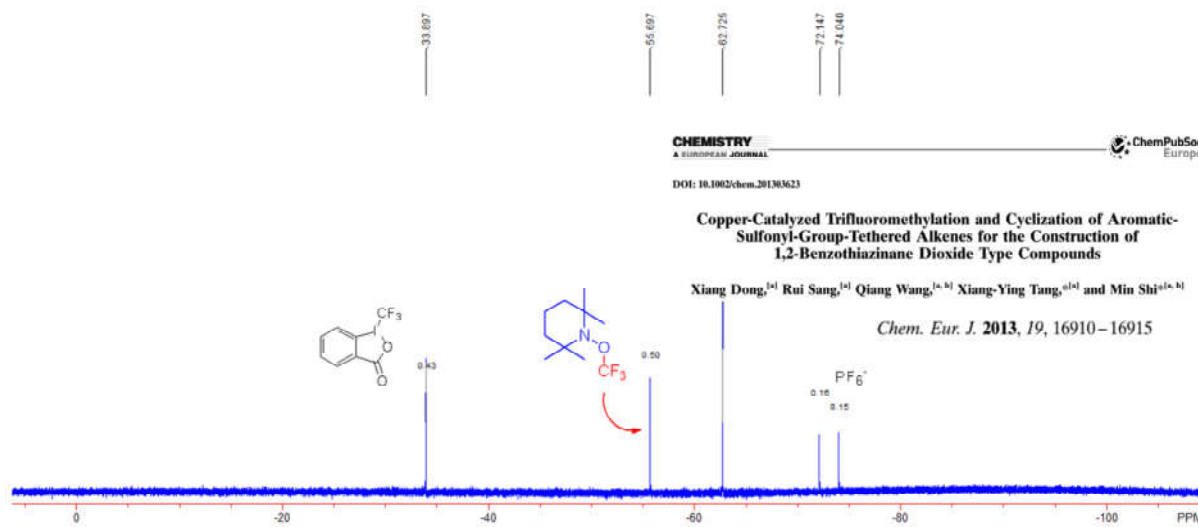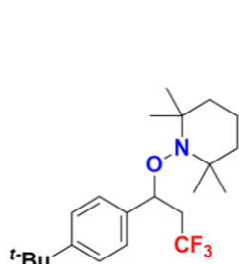

JACS  
JOURNAL OF THE AMERICAN CHEMICAL SOCIETY

Communication  
pubs.acs.org/JACS

Enantioselective Copper-Catalyzed Intermolecular Cyanotrifluoromethylation of Alkenes via Radical Process

Fei Wang,<sup>†</sup> Dinghai Wang,<sup>‡</sup> Xiaolong Wan,<sup>‡</sup> Lianqian Wu,<sup>†</sup> Pinhong Chen,<sup>†</sup> and Guosheng Liu<sup>\*,†</sup>

<sup>†</sup>State Key Laboratory of Organometallic Chemistry, Shanghai Institute of Organic Chemistry, University of Chinese Academy of Sciences, Chinese Academy of Sciences, 345 Lingling Road, Shanghai, China, 200032

<sup>‡</sup>Shanghai Institute of Organic Chemistry, Chinese Academy of Sciences, 345 Lingling Road, Shanghai, China, 200032

DOI: 10.1021/jacs.6b10468  
J. Am. Chem. Soc. 2016, 138, 15547–15550

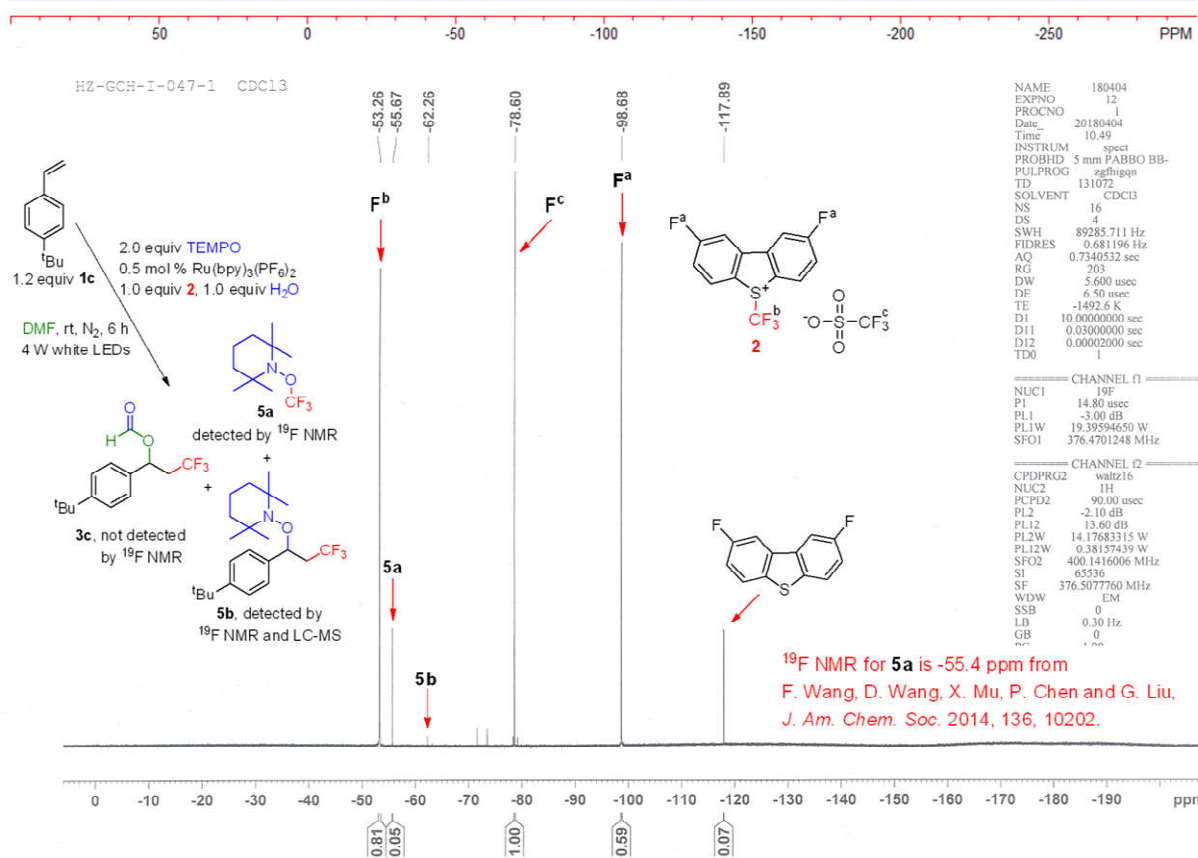

## Qualitative Analysis Report

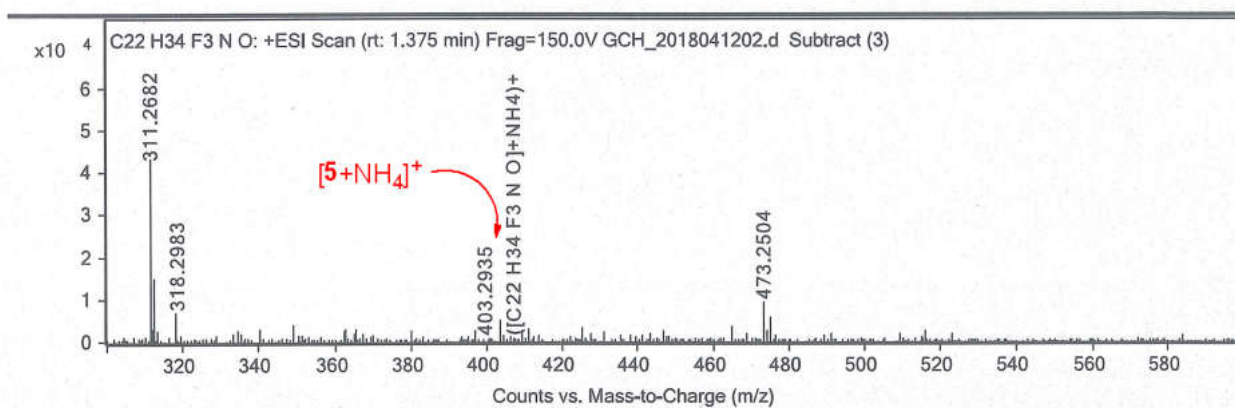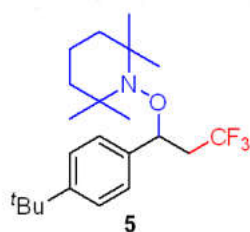

Chemical Formula: C<sub>22</sub>H<sub>34</sub>F<sub>3</sub>NO  
Exact Mass: 385.2592

[5+NH<sub>4</sub>]<sup>+</sup>

Chemical Formula: C<sub>22</sub>H<sub>38</sub>F<sub>3</sub>N<sub>2</sub>O  
Exact Mass: 403.2931

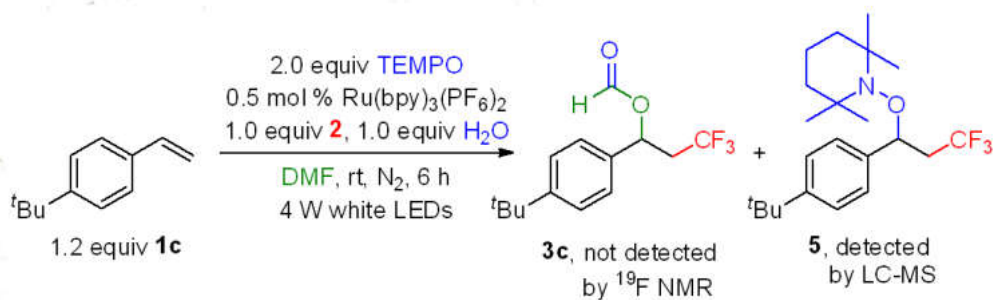

GCH-I-048-2 CDCl<sub>3</sub>

NAME 180418  
 EXPNO 11  
 PROCNO 1  
 Date\_ 20180418  
 Time 15.33  
 INSTRUM spect  
 PROBHD 5 mm PABBO BB-  
 PULPROG zg30  
 TD 65536  
 SOLVENT CDCl<sub>3</sub>  
 NS 16  
 DS 2  
 SWH 8223.685 Hz  
 FIDRES 0.125483 Hz  
 AQ 3.9846387 sec  
 RG 128  
 DW 60.800 usec  
 DE 6.50 usec  
 TE 3276.1 K  
 D1 1.00000000 sec  
 TD0 1

===== CHANNEL f1 =====  
 NUC1 1H  
 P1 14.77 usec  
 PL1 -2.10 dB  
 PL1W 14.17683315 W  
 SFO1 400.1424710 MHz  
 SI 32768  
 SF 400.1400091 MHz  
 WDW EM  
 SSB 0  
 LB 0.30 Hz  
 GB 0  
 PC 1.00

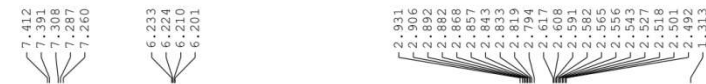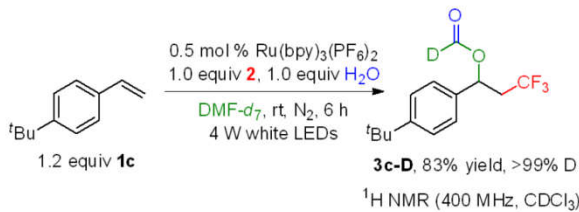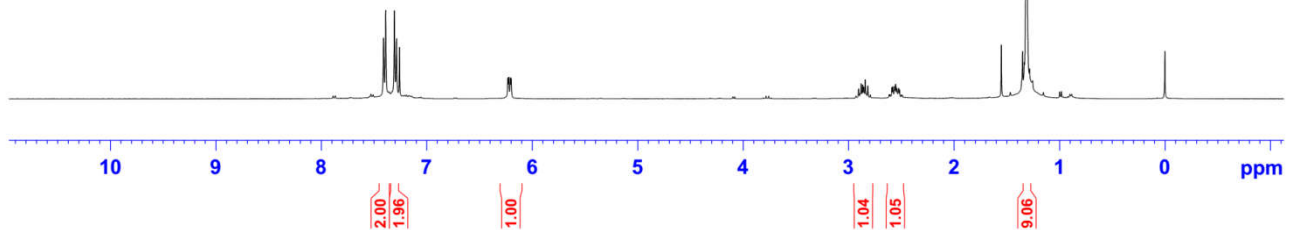

GCH-I-048-2 CDCl<sub>3</sub>

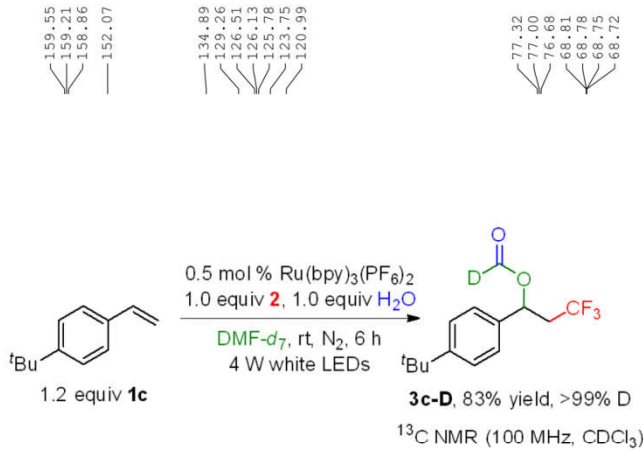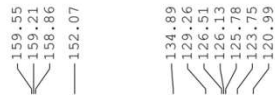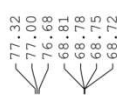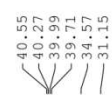

NAME 180418  
 EXPNO 21  
 PROCNO 1  
 Date\_ 20180418  
 Time 16.46  
 INSTRUM spect  
 PROBHD 5 mm PABBO BB-  
 PULPROG zgpg30  
 TD 65536  
 SOLVENT CDCl<sub>3</sub>  
 NS 378  
 DS 4  
 SWH 24038.461 Hz  
 FIDRES 0.366798 Hz  
 AQ 1.3631988 sec  
 RG 203  
 DW 20.800 usec  
 DE 6.50 usec  
 TE -3148.2 K  
 D1 2.00000000 sec  
 D11 0.03000000 sec  
 TD0 1

===== CHANNEL f1 =====  
 NUC1 13C  
 P1 9.00 usec  
 PL1 -2.10 dB  
 PL1W 53.74446869 W  
 SFO1 100.6253446 MHz

===== CHANNEL f2 =====  
 CPDPRG2 waltz16  
 NUC2 1H  
 PCPD2 90.00 usec  
 PL2 -2.10 dB  
 PL12 13.60 dB  
 PL13 13.52 dB  
 PL2W 14.17683315 W  
 PL12W 0.38157439 W  
 PL13W 0.38866836 W  
 SFO2 400.1416006 MHz  
 SI 32768  
 SF 100.6152911 MHz  
 WDW EM  
 SSB 0  
 LB 1.00 Hz  
 GB 0  
 PC 1.40

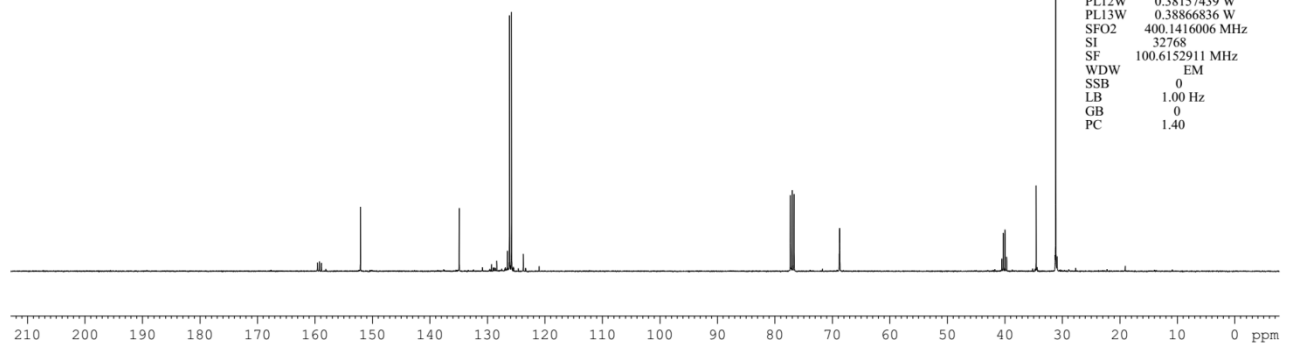

GCH-I-048-2 CDCL3

-64.21

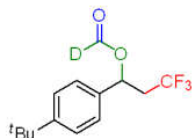

**3c-D**  
<sup>19</sup>F NMR (376 MHz, CDCl<sub>3</sub>)

```

NAME      180418
EXPNO     12
PROCNO    1
Date_     20180418
Time      15.34
INSTRUM   spect
PROBHD    5 mm PABBO BB-
PULPROG   zgpg30
TD         131072
SOLVENT   CDCl3
NS         16
DS         4
SWH        89285.711 Hz
FIDRES     0.681196 Hz
AQ         0.7340532 sec
RG         203
DW         5.600 usec
DE         6.50 usec
TE         3098.9 K
D1         1.00000000 sec
D11        0.03000000 sec
D12        0.00002000 sec
TD0        1
    
```

```

===== CHANNEL f1 =====
NUC1       19F
P1         14.80 usec
PL1        -3.00 dB
PL1W       19.39594650 W
SFO1       376.4701248 MHz
    
```

```

===== CHANNEL f2 =====
CPDPRG2    waltz16
NUC2        1H
PCPD2       90.00 usec
PL2         -2.10 dB
PL12        13.60 dB
PL2W        14.17683315 W
PL12W       0.38157439 W
SFO2        400.1416006 MHz
SI          65536
SF          376.5077760 MHz
WDW         EM
SSB         0
LB          0.30 Hz
GB          0
PC          1.00
    
```

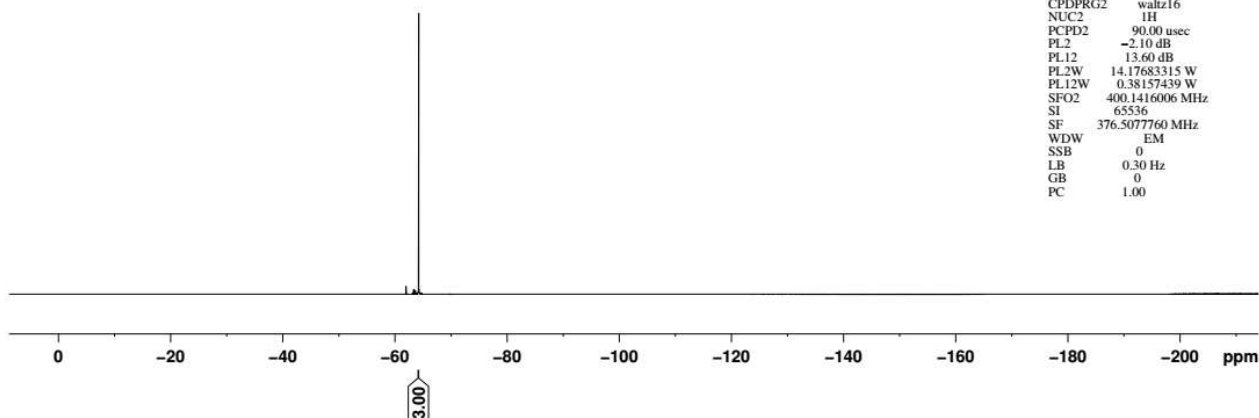

**Monoisotopic Mass, Odd and Even Electron Ions**

979 formula(e) evaluated with 1 results within limits (up to 50 best isotopic matches for each mass)

Elements Used:

C: 12-15 1H: 0-60 2H: 0-1 B: 0-1 O: 0-2 F: 0-3

default file

EI-20180427 799 (7.321) Cm (799:801-806:808)

TOF MS EI+  
 1.81e+004

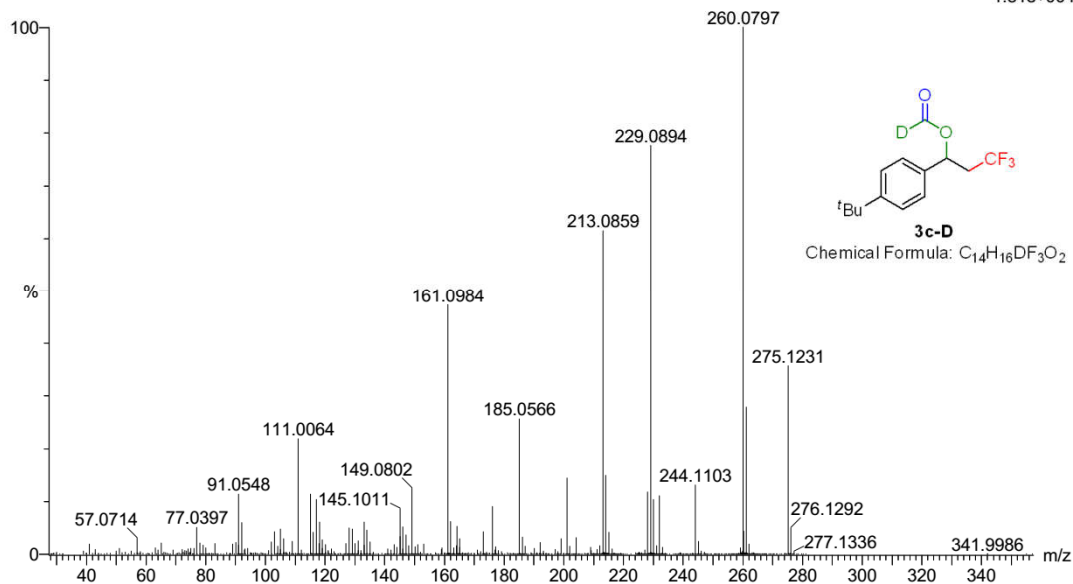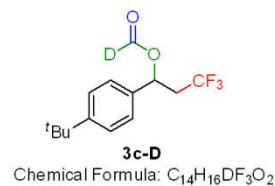

| Mass     | Calc. Mass | mDa  | PPM  | DBE | i-FIT | Formula           |
|----------|------------|------|------|-----|-------|-------------------|
| 275.1231 | 275.1243   | -1.2 | -4.4 | 5.0 | 37.5  | C14 1H16 2H 02 F3 |

GCH-I-059-2 CDCL3

NAME 180528  
 EXPNO 11  
 PROCNO 1  
 Date\_ 20180528  
 Time 15.41  
 INSTRUM spect  
 PROBHD 5 mm PABBO BB-  
 PULPROG zg30  
 TD 65536  
 SOLVENT CDCL3  
 NS 16  
 DS 2  
 SWH 8223.685 Hz  
 FIDRES 0.125483 Hz  
 AQ 3.9846387 sec  
 RG 203  
 DW 60.800 usec  
 DE 6.50 usec  
 TE 297.4 K  
 D1 1.00000000 sec  
 TD0 1

===== CHANNEL f1 =====  
 NUC1 1H  
 P1 14.77 usec  
 PL1 -2.10 dB  
 PL1W 14.17683315 W  
 SFO1 400.1424710 MHz  
 SI 32768  
 SF 400.1400091 MHz  
 WDW EM  
 SSB 0  
 LB 0.30 Hz  
 GB 0  
 PC 1.00

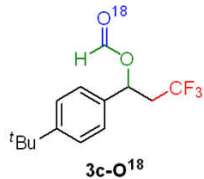

<sup>1</sup>H NMR (400 MHz, CDCl<sub>3</sub>)

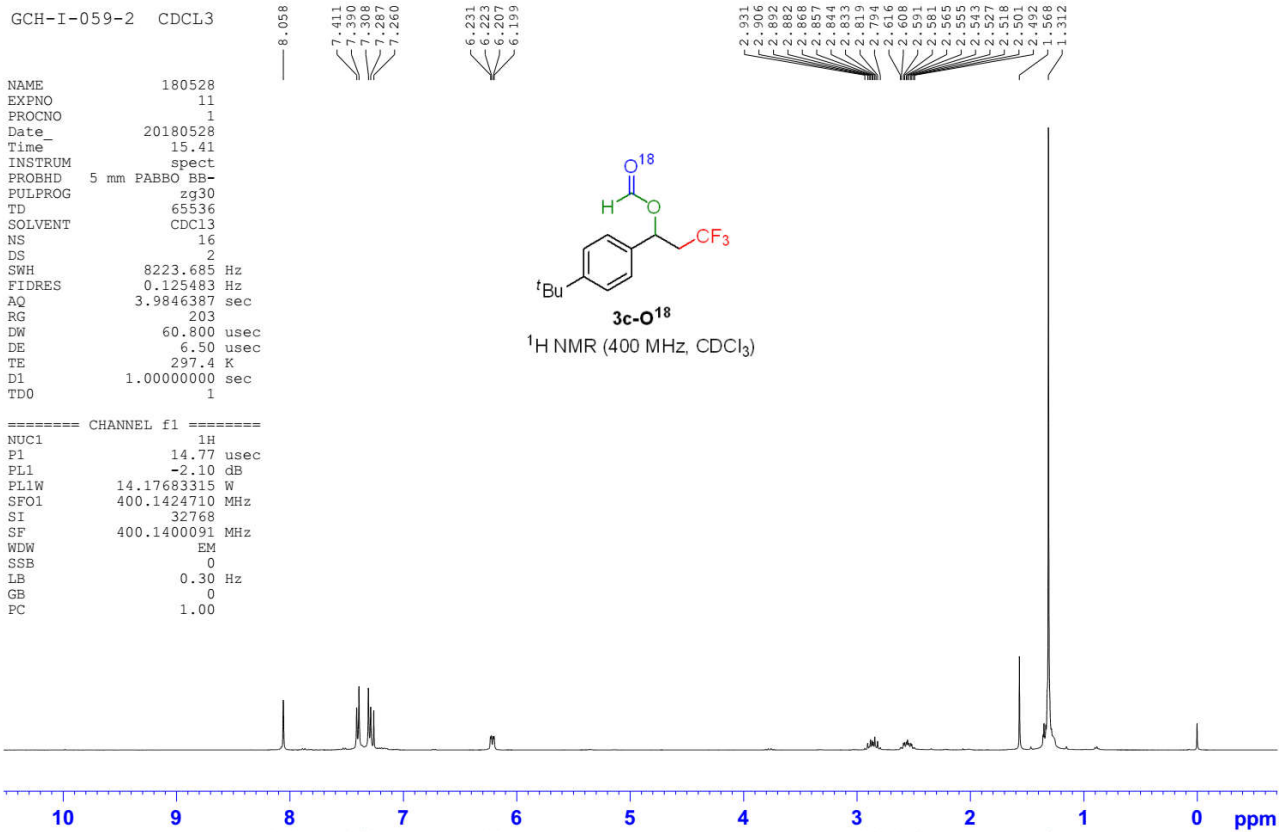

GCH-I-059-2 CDCL3

NAME 180528  
 EXPNO 12  
 PROCNO 1  
 Date\_ 20180528  
 Time 16.00  
 INSTRUM spect  
 PROBHD 5 mm PABBO BB-  
 PULPROG zgpg30  
 TD 65536  
 SOLVENT CDCL3  
 NS 120  
 DS 4  
 SWH 24038.461 Hz  
 FIDRES 0.366798 Hz  
 AQ 1.3631988 sec  
 RG 203  
 DW 20.800 usec  
 DE 6.50 usec  
 TE 298.2 K  
 D1 2.00000000 sec  
 D11 0.03000000 sec  
 TD0 1

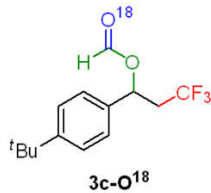

<sup>13</sup>C NMR (100 MHz, CDCl<sub>3</sub>)

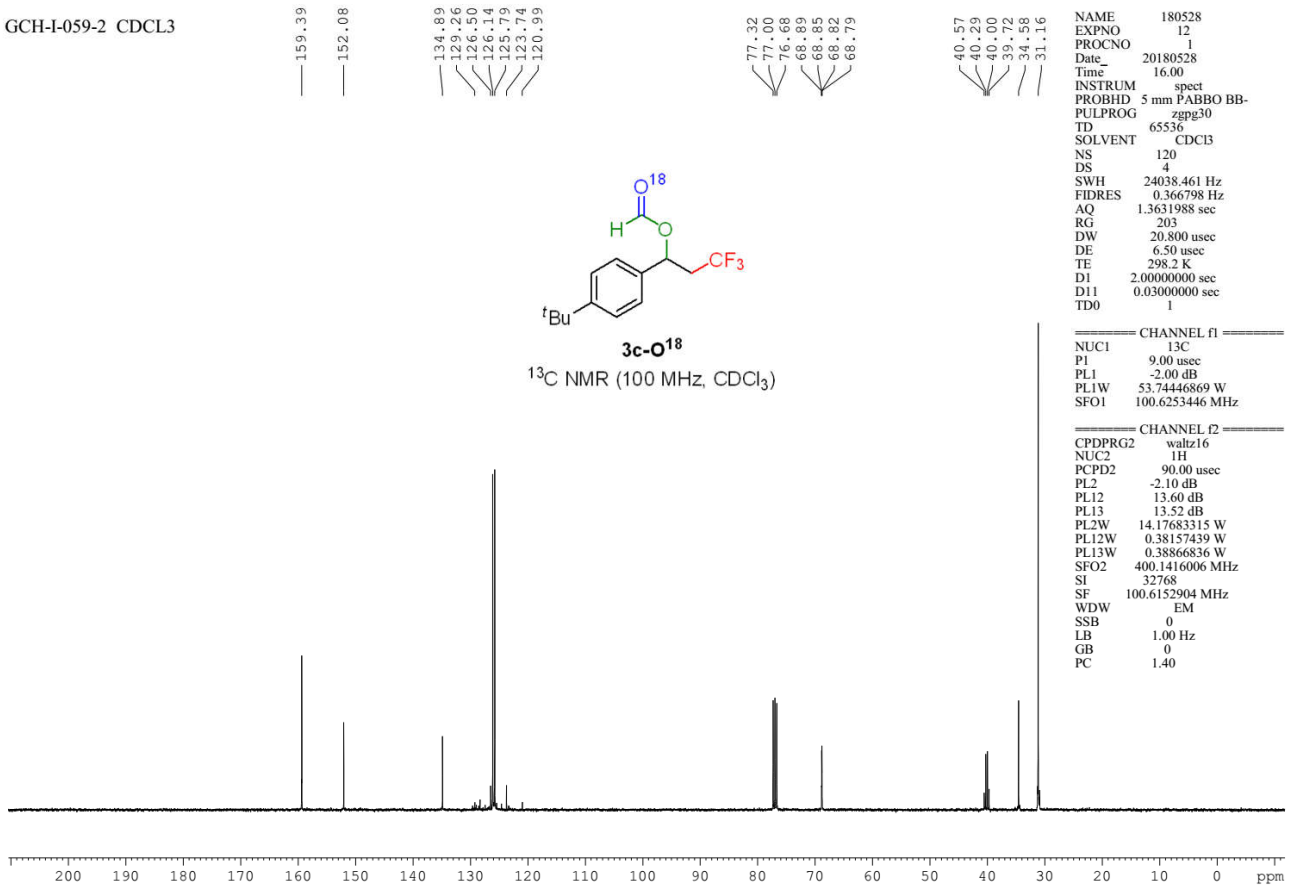

===== CHANNEL f1 =====  
 NUC1 13C  
 P1 9.00 usec  
 PL1 -2.00 dB  
 PL1W 53.74446869 W  
 SFO1 100.6253446 MHz

===== CHANNEL f2 =====  
 CPDPRG2 waltz16  
 NUC2 1H  
 PCPD2 90.00 usec  
 PL2 -2.10 dB  
 PL12 13.60 dB  
 PL13 13.52 dB  
 PL2W 14.17683315 W  
 PL12W 0.38157439 W  
 PL13W 0.38866836 W  
 SFO2 400.1416006 MHz  
 SI 32768  
 SF 100.6152904 MHz  
 WDW EM  
 SSB 0  
 LB 1.00 Hz  
 GB 0  
 PC 1.40

GCH-I-059-2 CDCL3

-64.21

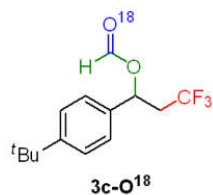

<sup>19</sup>F NMR (376 MHz, CDCl<sub>3</sub>)

```

NAME      180528
EXPNO     10
PROCNO    1
Date_     20180528
Time      15.39
INSTRUM   spect
PROBHHD   5 mm PABBO BB-
PULPROG   zgpg30
TD         131072
SOLVENT   CDCl3
NS         16
DS         4
SWH        89285.711 Hz
FIDRES     0.681196 Hz
AQ         0.7340532 sec
RG         203
DW         5.600 usec
DE         6.50 usec
TE         297.6 K
D1         1.0000000 sec
D11        0.0300000 sec
D12        0.0000200 sec
TD0        1
    
```

```

===== CHANNEL f1 =====
NUC1      19F
P1        14.80 usec
PL1       -3.00 dB
PL1W      19.39594650 W
SFO1      376.4701248 MHz
    
```

```

===== CHANNEL f2 =====
CPDPRG2   waltz16
NUC2      1H
PCPD2     90.00 usec
PL2       -2.10 dB
PL12      13.60 dB
PL2W      14.17683315 W
PL12W     0.38157439 W
SFO2      400.1416006 MHz
SI         65536
SF        376.5077760 MHz
WDW        EM
SSB        0
LB         0.30 Hz
GB         0
PC         1.00
    
```

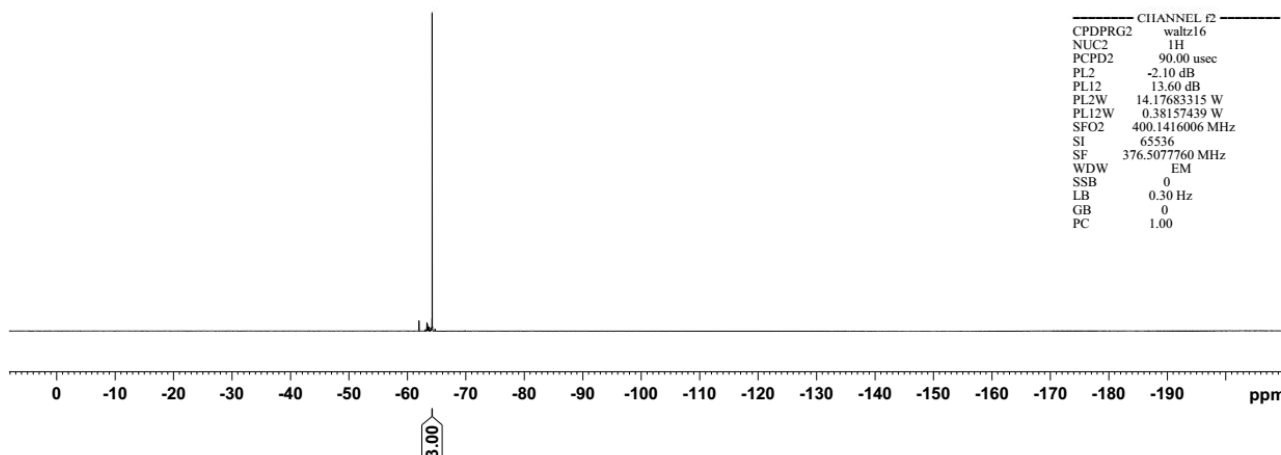

**Monoisotopic Mass, Odd and Even Electron Ions**

243 formula(e) evaluated with 1 results within limits (up to 50 best isotopic matches for each mass)

Elements Used:

C: 12-30 H: 0-60 16O: 1-2 17O: 0-2 18O: 0-2 F: 1-8

default file

GCH-0529 981 (8.292) Cm (978:981-962:973)

TOF MS EI+  
3.92e+004

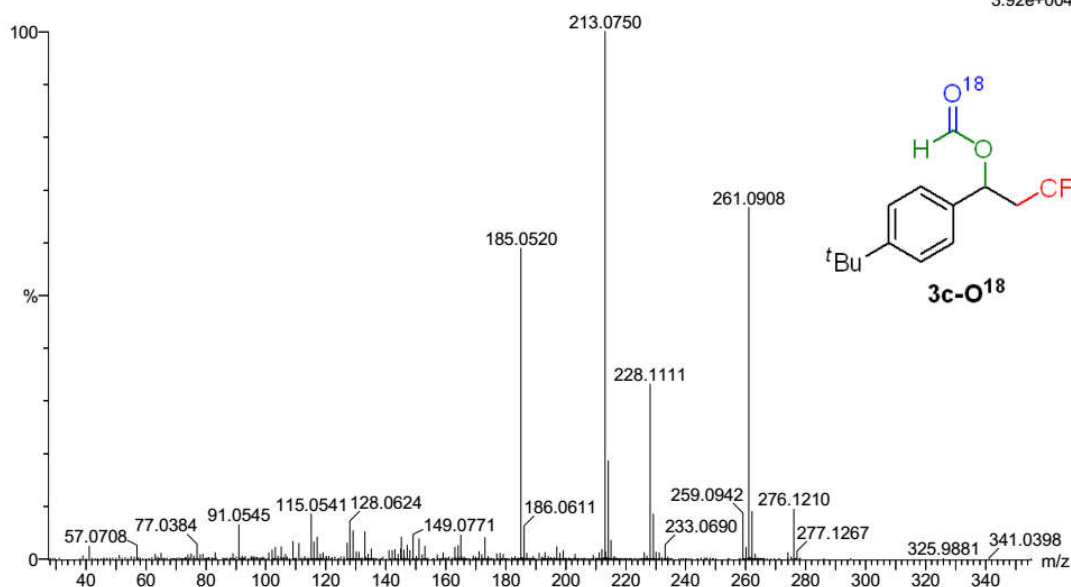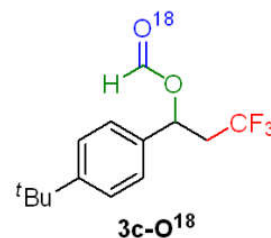

| Mass     | Calc. Mass | mDa  | PPM  | DBE | i-FIT | Formula            |
|----------|------------|------|------|-----|-------|--------------------|
| 276.1210 | 276.1223   | -1.3 | -4.7 | 5.0 | 63.3  | C14 H17 160 180 F3 |

GCH-I-061-2 CDCl3

NAME 180531  
EXPNO 2  
PROCNO 1  
Date\_ 20180531  
Time 11.26  
INSTRUM spect  
PROBHD 5 mm PABBO BB-  
PULPROG zg30  
TD 65536  
SOLVENT CDCl3  
NS 16  
DS 2  
SWH 8223.685 Hz  
FIDRES 0.125483 Hz  
AQ 3.9846387 sec  
RG 128  
DW 60.800 usec  
DE 6.50 usec  
TE 297.2 K  
D1 1.00000000 sec  
TD0 1

===== CHANNEL f1 =====  
NUC1 1H  
P1 14.77 usec  
PL1 -2.10 dB  
PL1W 14.17683315 W  
SFO1 400.1424710 MHz  
SI 32768  
SF 400.1400091 MHz  
WDW EM  
SSB 0  
LB 0.30 Hz  
GB 0  
PC 1.00

7.420  
7.389  
7.380  
7.299  
7.260  
5.083  
5.075  
5.067  
5.059  
5.052  
5.044  
2.710  
2.684  
2.672  
2.659  
2.652  
2.635  
2.622  
2.609  
2.597  
2.571  
2.514  
2.506  
2.486  
2.478  
2.459  
2.450  
2.431  
2.422  
2.413  
2.394  
2.386  
2.121  
2.115  
1.588  
1.323

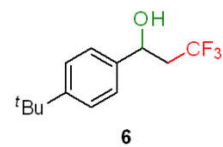

<sup>1</sup>H NMR (400 MHz, CDCl<sub>3</sub>)

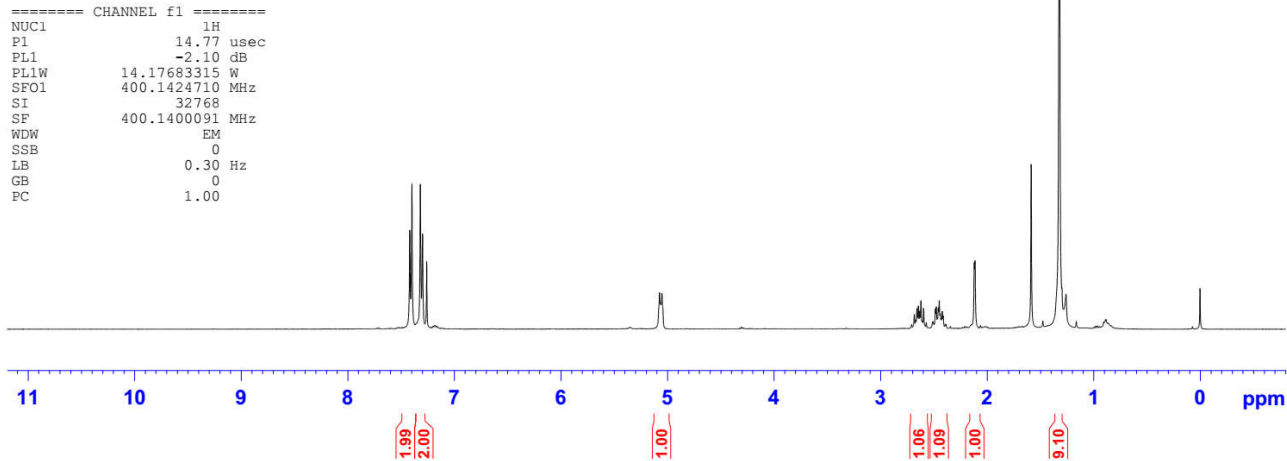

GCH-I-061-2 CDCl3

NAME 180531  
EXPNO 4  
PROCNO 1  
Date\_ 20180531  
Time 12.36  
INSTRUM spect  
PROBHD 5 mm PABBO BB-  
PULPROG zgpg30  
TD 65536  
SOLVENT CDCl3  
NS 1024  
DS 4  
SWH 24038.461 Hz  
FIDRES 0.366798 Hz  
AQ 1.3631988 sec  
RG 203  
DW 20.800 usec  
DE 6.50 usec  
TE 298.2 K  
D1 2.00000000 sec  
D11 0.03000000 sec  
TD0 1

===== CHANNEL f1 =====  
NUC1 13C  
P1 9.00 usec  
PL1 -2.00 dB  
PL1W 53.74446869 W  
SFO1 100.6253446 MHz  
===== CHANNEL f2 =====  
CPDPRG2 waltz16  
NUC2 1H  
PCPD2 90.00 usec  
PL2 -2.10 dB  
PL12 13.60 dB  
PL13 13.52 dB  
PL2W 14.17683315 W  
PL12W 0.38157439 W  
PL13W 0.38866836 W  
SFO2 400.1416006 MHz  
SI 32768  
SF 100.6152933 MHz  
WDW EM  
SSB 0  
LB 1.00 Hz  
GB 0  
PC 1.40

151.36  
139.40  
130.03  
127.28  
125.63  
125.41  
124.52  
121.76  
77.32  
77.00  
76.68  
68.46  
68.43  
68.40  
68.37  
42.91  
42.64  
42.37  
42.11  
34.50  
31.21

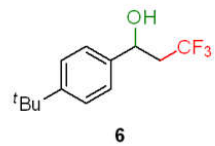

<sup>13</sup>C NMR (100 MHz, CDCl<sub>3</sub>)

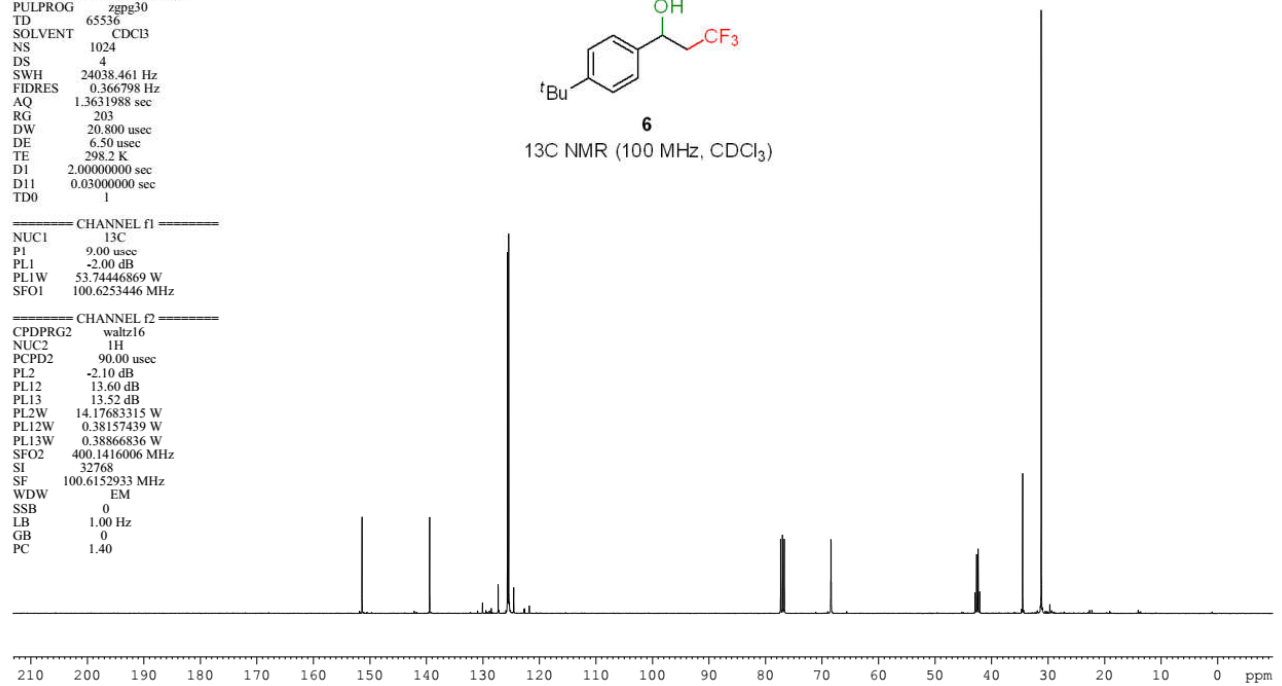

-63.77

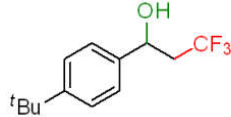

6

<sup>19</sup>F NMR (376 MHz, CDCl<sub>3</sub>)

```

NAME      180531
EXPNO     1
PROCNO    1
Date_     20180531
Time      11.24
INSTRUM   spect
PROBHD    5 mm PABBO BB-
PULPROG   zgpg30
TD         131072
SOLVENT   CDCl3
NS         16
DS         4
SWH        89285.711 Hz
FIDRES    0.681196 Hz
AQ         0.7340532 sec
RG         203
DW         5.600 usec
DE         6.50 usec
TE         297.4 K
D1         1.00000000 sec
D11        0.03000000 sec
D12        0.00002000 sec
TD0        1
    
```

```

===== CHANNEL f1 =====
NUC1       19F
PI         14.80 usec
PL1        -3.00 dB
PL1W       19.39594650 W
SFO1       376.4701248 MHz
    
```

```

===== CHANNEL f2 =====
CPDPRG2    waltz16
NUC2        1H
PCPD2       90.00 usec
PL2         -2.10 dB
PL12        13.60 dB
PL2W        14.17683315 W
PL12W       0.38157439 W
SFO2        400.1416006 MHz
SI          63536
SF          376.5077760 MHz
WDW         EM
SSB         0
LB          0.30 Hz
GB          0
PC          1.00
    
```

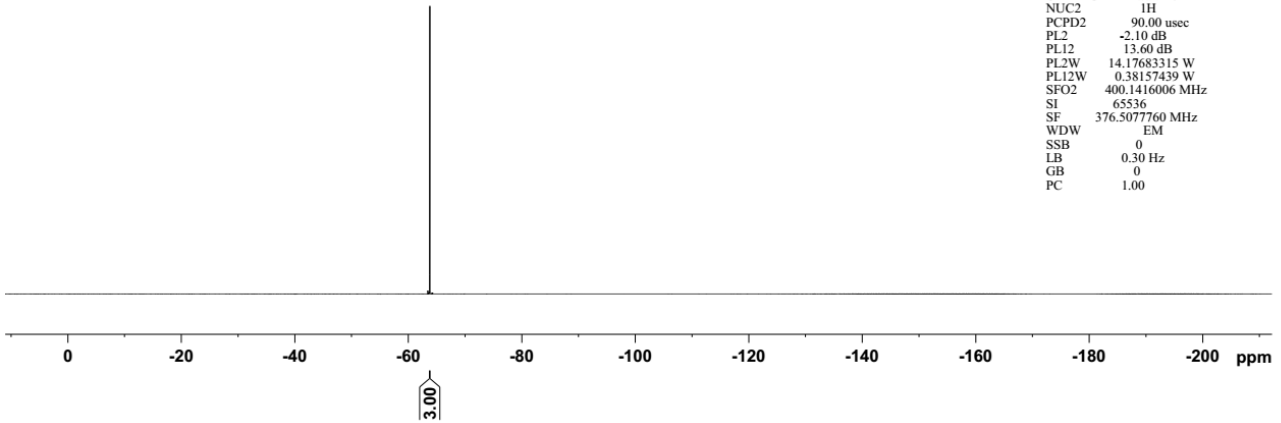

Monoisotopic Mass, Odd and Even Electron Ions

88 formula(e) evaluated with 1 results within limits (up to 50 best isotopic matches for each mass)

Elements Used:

C: 5-30 H: 0-60 O: 0-4 F: 1-8

default file

GCH-0531-3 1135 (9.113) Cm (1135-1127:1132)

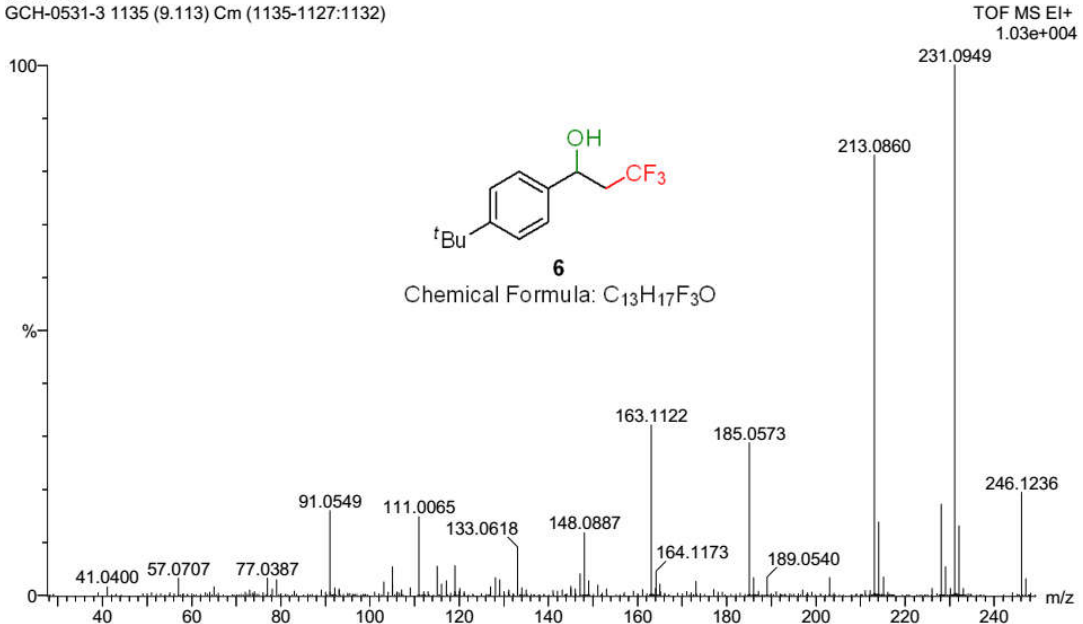

Chemical Formula: C<sub>13</sub>H<sub>17</sub>F<sub>3</sub>O

| Mass     | Calc. Mass | mDa | PPM | DBE | i-FIT | Formula      |
|----------|------------|-----|-----|-----|-------|--------------|
| 246.1236 | 246.1232   | 0.4 | 1.6 | 4.0 | 1.1   | C13 H17 O F3 |
